# Supplementary material for: One pot synthesis of trifluoromethyl aryl sulfoxides by trifluoromethylthiolation of arenes and subsequent oxidation with hydrogen peroxide
Source: Royal Society of Chemistry journal article supplement (doi:10.1039/d0ra04621c), 2020-01-01
Supplement: d0ra04621c1.pdf [file d0ra04621c1.pdf]

## Supporting Information

### **One pot synthesis of trifluoromethyl aryl sulfoxides by trifluoromethylthiolation of arenes and subsequent oxidation with hydrogen peroxide**

Monika Horvat, Gregor Kodrič, Marjan Jereb, Jernej Iskra\*

University of Ljubljana, Faculty of Chemistry and Chemical Technology, Večna pot 113, 1000 Ljubljana, Slovenia. [jernej.iskra@fkkt.uni-lj.si](mailto:jernej.iskra@fkkt.uni-lj.si)

\*corresponding author: [jernej.iskra@fkkt.uni-lj.si](mailto:jernej.iskra@fkkt.uni-lj.si)

## Table of contents

|                                                                                             |    |
|---------------------------------------------------------------------------------------------|----|
| General Information.....                                                                    | 3  |
| Characterization Data for products .....                                                    | 4  |
| Characterization Data for products – One-pot .....                                          | 14 |
| <sup>1</sup> H, <sup>13</sup> C and <sup>19</sup> F spectra.....                            | 19 |
| 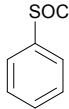 2a.....   | 19 |
|  3a.....   | 20 |
|  2b.....   | 21 |
|  2c.....   | 23 |
|  2d.....  | 24 |
|  2e..... | 26 |
|  2f..... | 27 |
|  2g..... | 29 |
|  2h..... | 30 |
|  2i..... | 32 |
|  2j..... | 33 |
|  2k..... | 35 |
|  2l..... | 36 |

|                                                                                   |           |    |
|-----------------------------------------------------------------------------------|-----------|----|
| 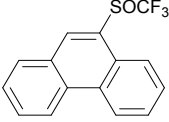 | 2m .....  | 38 |
|  | 2n .....  | 39 |
|  | 2o .....  | 41 |
|  | 2o' ..... | 42 |
|  | .....     | 44 |
| References .....                                                                  |           | 48 |

## Experimental section

### General Information

TLC was performed on Merck-60-F<sub>254</sub> plates using dichloromethane or mixtures of hexane:EtOAc (9:1). The crude products were purified by column chromatography on silica gel (63-200  $\mu\text{m}$ , 70-230 mesh ASTM; Fluka). The melting points were determined on OptiMelt MPA100. Products were characterized by <sup>1</sup>H, <sup>13</sup>C and <sup>19</sup>F NMR spectra, HRMS and melting points of solids. <sup>1</sup>H spectra were recorded on Bruker Avance 300 DPX, <sup>1</sup>H, <sup>13</sup>C and <sup>19</sup>F NMR spectra on Bruker Avance III 500 instruments, C, H, N analysis were performed on Analyzer Perkin-Elmer 2400 II. GC-MS was recorded on GC/MS Hewlett Packard 6890 (HP-1 MS column, initial temperature - 80 °C, 20 °C/min, final temperature - 270 °C).

**The effect of reaction conditions on the oxidation of 1 to 2:** To a solution of trifluoromethyl sulfide **1** (0.5 mmol) in 2 or 5 mL of solvent was added H<sub>2</sub>O<sub>2</sub> (1-2 equiv.) or *m*-CPBA (1.2 equiv.) and activator (10 mol%). The reaction mixture was stirred for 3-24 h. After reaction was complete, the reaction mixture was washed with NaHSO<sub>3</sub>, extracted with DCM (3×5 mL). The organic layer was dried over anhydrous Na<sub>2</sub>SO<sub>4</sub> and evaporated in vacuo. The product was analyzed by NMR spectroscopy. Results are presented in *Tables 1, 2, 3 and 4*.

### Oxidation of thianthrene with 1.2 and 2 equivalent of *m*-CPBA and with H<sub>2</sub>O<sub>2</sub>

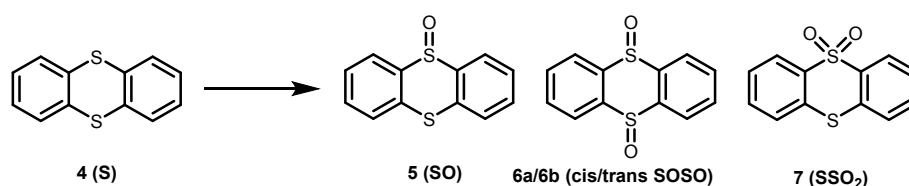

Table 1. Selectivity of oxidation of thianthrene **4**.

| Reaction conditions           |        |         |       |          | Conversion |               |                               |                                 |                             |
|-------------------------------|--------|---------|-------|----------|------------|---------------|-------------------------------|---------------------------------|-----------------------------|
| oxidant                       | equiv. | solvent | temp. | time [h] | <b>4</b>   | <b>5</b> (SO) | <b>6a</b> ( <i>cis</i> -SOSO) | <b>6b</b> ( <i>trans</i> -SOSO) | <b>7</b> (SO <sub>2</sub> ) |
| <i>m</i> -CPBA                | 1.2    | DCM     | r.t.  | 24       | 8          | 81            | 3                             | 7                               | 1                           |
| <i>m</i> -CPBA                | 1.2    | MeCN    | r.t.  | 24       | 15         | 67            | 5                             | 12                              | 1                           |
| <i>m</i> -CPBA                | 1.2    | TFA     | 0 °C  | 2.5      | 44         | 12            | 36                            | 8                               | 0                           |
| H <sub>2</sub> O <sub>2</sub> | 1.2    | TFA     | 0 °C  | 2.5      | 41         | 30            | 27                            | 2                               | 0                           |
| H <sub>2</sub> O <sub>2</sub> | 1.2    | TFA     | r.t.  | 2.5      | 39         | 26            | 32                            | 3                               | 0                           |
| H <sub>2</sub> O <sub>2</sub> | 1.2    | TFA     | r.t.  | 24       | 32         | 41            | 24                            | 3                               | 0                           |
| <i>m</i> -CPBA                | 2.0    | DCM     | r.t.  | 24       | 0          | 61            | 9                             | 25                              | 5                           |
| <i>m</i> -CPBA                | 2.0    | MeCN    | r.t.  | 24       | 0          | 57            | 8                             | 28                              | 7                           |
| <i>m</i> -CPBA                | 2.0    | TFA     | 0 °C  | 2.5      | 19         | 7             | 61                            | 13                              | 0                           |
| H <sub>2</sub> O <sub>2</sub> | 2.0    | TFA     | 0 °C  | 2.5      | 10         | 14            | 71                            | 5                               | 0                           |
| H <sub>2</sub> O <sub>2</sub> | 2.0    | TFA     | r.t.  | 2.5      | 9          | 25            | 47                            | 19                              | 0                           |
| H <sub>2</sub> O <sub>2</sub> | 2.0    | TFA     | r.t.  | 24       | 7          | 27            | 53                            | 13                              | 0                           |

Reaction conditions: **4** (0.5 mmol), oxidant (1.0 mmol), solvent (5 mL), time. Product distribution was determined by <sup>1</sup>H NMR spectroscopy.

## Characterization Data for products

### ((trifluoromethyl)sulfinyl)benzene (2a)<sup>[1]</sup>

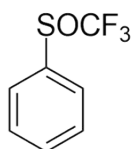

To a solution of phenyl(trifluoromethyl)sulfane (89 mg, 0.5 mmol) in 2 mL of solvent TFA at 0 °C was added 30% H<sub>2</sub>O<sub>2</sub> (68 mg, 0.6 mmol). The reaction mixture was stirred at 0 °C for 6 h. Reaction time was determined with GC-MS. After reaction was complete, the reaction mixture was washed with NaHSO<sub>3</sub> and extracted with DCM (3×5 mL). The organic layer was dried over anhydrous Na<sub>2</sub>SO<sub>4</sub> and evaporated under vacuum to provide the product (84 mg, 87%) as colorless, viscous liquid.

|                                                          |                                                                                                            |
|----------------------------------------------------------|------------------------------------------------------------------------------------------------------------|
| yield                                                    | 84 mg, 87%                                                                                                 |
| <sup>1</sup> H NMR (500 MHz, CDCl <sub>3</sub> , 25 °C)  | δ = 7.81 (d, <i>J</i> = 7.5 Hz, 2H), 7.59-7.72 (m, 3H) ppm.                                                |
| <sup>13</sup> C NMR (126 MHz, CDCl <sub>3</sub> , 25 °C) | δ = 133.9, 131.3, 130.2, 126.5, 121.6 (q, <i>J</i> = 333 Hz) ppm.                                          |
| <sup>19</sup> F NMR (471 MHz, CDCl <sub>3</sub> , 25 °C) | δ = -74.5 (s, 3F) ppm.                                                                                     |
| ESI-HRMS                                                 | C <sub>7</sub> H <sub>6</sub> F <sub>3</sub> OS (M + H) <sup>+</sup><br>calcd: 195.0086<br>found: 195.0084 |
| IR                                                       | 3065, 1788, 1584, 1447, 1172, 1085, 750, 686 cm <sup>-1</sup> .                                            |

### **((trifluoromethyl)sulfonyl)benzene (3a)**<sup>[2]</sup>

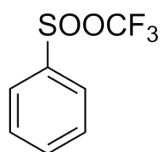

To a solution of phenyl(trifluoromethyl)sulfane (89 mg, 0.5 mmol) in 2 mL of solvent TFA was added 30% H<sub>2</sub>O<sub>2</sub> (340 mg, 3.0 mmol). The reaction mixture was stirred at 25 °C for 5 h. Reaction time was determined with GC-MS. After reaction was complete, the reaction mixture was washed with NaHSO<sub>3</sub> and extracted with DCM (3×5 mL). The organic layer was dried over anhydrous Na<sub>2</sub>SO<sub>4</sub> and evaporated under vacuum to provide the product (100 mg, 95%) as colorless, viscous liquid.

|                                                         |                                                                                                            |
|---------------------------------------------------------|------------------------------------------------------------------------------------------------------------|
| yield                                                   | 100 mg, 95%                                                                                                |
| <sup>1</sup> H NMR (500 MHz, CDCl <sub>3</sub> , 25°C)  | δ = 8.06 (d, <i>J</i> = 7.5 Hz, 2H), 7.85 (t, <i>J</i> = 7.5 Hz, 1H), 7.69 (t, <i>J</i> = 7.5 Hz, 2H) ppm. |
| <sup>13</sup> C NMR (126 MHz, CDCl <sub>3</sub> , 25°C) | δ = 136.5, 131.4, 130.8, 129.9, 119.8 (q, <i>J</i> = 324 Hz) ppm.                                          |
| <sup>19</sup> F NMR (471 MHz, CDCl <sub>3</sub> , 25°C) | δ = -78.9 (s, 3F) ppm.                                                                                     |
| GC-MS                                                   | <i>m/z</i> (%) = 210 [M <sup>+</sup> ] (100).                                                              |
| IR                                                      | 3072, 1584, 1450, 1190, 1071, 720, 682 cm <sup>-1</sup> .                                                  |

### **3-((trifluoromethyl)sulfinyl)-[1,1'-biphenyl]-4-ol (2b)**<sup>[3]</sup>

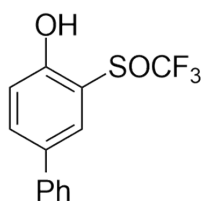

To a solution of 3-((trifluoromethyl)thio)-[1,1'-biphenyl]-4-ol (55 mg, 0.2 mmol) in 2 mL of solvent TFA at 0 °C was added 30% H<sub>2</sub>O<sub>2</sub> (27 mg, 0.24 mmol). The reaction mixture was stirred at 0 °C for 24 h. Reaction time was determined with GC-MS. After reaction was complete, the reaction mixture was washed with NaHSO<sub>3</sub> and extracted with DCM (3×5 mL). The organic layer was dried over anhydrous Na<sub>2</sub>SO<sub>4</sub> and evaporated under vacuum to provide the product (48 mg, 84%) as white solid.

|                                                         |                                                                                                                            |
|---------------------------------------------------------|----------------------------------------------------------------------------------------------------------------------------|
| yield                                                   | 48 mg, 84%                                                                                                                 |
| <sup>1</sup> H NMR (500 MHz, CDCl <sub>3</sub> , 25°C)  | δ = 9.42 (s, 1H), 7.75 (dd, <i>J</i> = 9.0, 2.5 Hz, 1H), 7.35-7.52 (m, 6H), 7.10 (d, <i>J</i> = 8.5 Hz, 1H) ppm.           |
| <sup>13</sup> C NMR (126 MHz, CDCl <sub>3</sub> , 25°C) | δ = 156.7, 156.6, 140.0, 134.6, 134.0, 129.8, 128.2, 127.2, 126.3 (q, <i>J</i> = 337 Hz), 124.7, 117.9 ppm.                |
| <sup>19</sup> F NMR (471 MHz, CDCl <sub>3</sub> , 25°C) | δ = -74.5 (s, 3F) ppm.                                                                                                     |
| ESI-HRMS                                                | C <sub>13</sub> H <sub>10</sub> F <sub>3</sub> O <sub>2</sub> S (M + H) <sup>+</sup><br>calcd: 287.0354<br>found: 287.0350 |
| IR                                                      | 3181, 2919, 2378, 1608, 1484, 1035, 760, 696 cm <sup>-1</sup> .                                                            |

### 1-(2,6-dihydroxy-3-((trifluoromethyl)sulfinyl)phenyl)ethanone (2c)

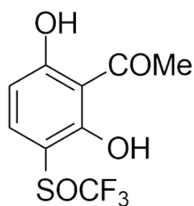

To a solution of 1-(2,6-dihydroxy-3-((trifluoromethyl)thio)phenyl)ethanone (63 mg, 0.25 mmol) in 2 mL of solvent TFA at 0 °C was added 30% H<sub>2</sub>O<sub>2</sub> (34 mg, 0.3 mmol). The reaction mixture was stirred at 0 °C for 24 h. Reaction time was determined with GC-MS. After reaction was complete, the reaction mixture was washed with NaHSO<sub>3</sub> and extracted with DCM (3×5 mL). The organic layer was dried over anhydrous Na<sub>2</sub>SO<sub>4</sub> and evaporated under vacuum to provide the product (57 mg, 85%) as yellow solid.

|                                                         |                                                                                                                           |
|---------------------------------------------------------|---------------------------------------------------------------------------------------------------------------------------|
| yield                                                   | 57 mg, 85%                                                                                                                |
| <sup>1</sup> H NMR (500 MHz, CDCl <sub>3</sub> , 25°C)  | δ = 14.10 (s, 1H), 11.31 (s, 1H), 7.83 (d, <i>J</i> = 8.5 Hz, 1H), 6.86 (d, <i>J</i> = 8.5 Hz, 1H), 2.76 (s, 3H) ppm.     |
| <sup>13</sup> C NMR (126 MHz, CDCl <sub>3</sub> , 25°C) | δ = 206.9, 166.4, 164.5, 134.0, 126.4 (q, <i>J</i> = 335 Hz), 113.1, 110.6, 109.9, 33.6 ppm.                              |
| <sup>19</sup> F NMR (471 MHz, CDCl <sub>3</sub> , 25°C) | δ = -75.4 (s, 3F) ppm.                                                                                                    |
| ESI-HRMS                                                | C <sub>9</sub> H <sub>8</sub> F <sub>3</sub> O <sub>4</sub> S (M + H) <sup>+</sup><br>calcd: 269.0095<br>found: 269.0098. |

### 1-((trifluoromethyl)sulfinyl)naphthalen-2-ol (2d)

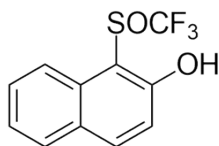

To a solution of 1-((trifluoromethyl)thio)naphthalen-2-ol (73 mg, 0.3 mmol) in 2 mL of solvent TFA at 0 °C was added 30% H<sub>2</sub>O<sub>2</sub> (41 mg, 0.36 mmol). The reaction mixture was stirred at 0 °C for 22 h. Reaction time was determined with GC-MS. After reaction was complete, the reaction mixture was washed with NaHSO<sub>3</sub> and extracted with DCM (3×5 mL). The organic layer was dried over anhydrous Na<sub>2</sub>SO<sub>4</sub> and evaporated under vacuum to provide the product (64 mg, 82%) as colorless, viscous liquid.

|                                                         |                                                                                                                                                                                                                    |
|---------------------------------------------------------|--------------------------------------------------------------------------------------------------------------------------------------------------------------------------------------------------------------------|
| yield                                                   | 64 mg, 82%                                                                                                                                                                                                         |
| <sup>1</sup> H NMR (500 MHz, CDCl <sub>3</sub> , 25°C)  | δ = 10.71 (s, 1H), 7.97 (d, <i>J</i> = 9 Hz, 1H), 7.82 (d, <i>J</i> = 8 Hz, 1H), 7.77 (d, <i>J</i> = 8.5 Hz, 1H), 7.56 (t, <i>J</i> = 8 Hz, 1H), 7.44 (t, <i>J</i> = 8 Hz, 1H), 7.14 (d, <i>J</i> = 9 Hz, 1H) ppm. |
| <sup>13</sup> C NMR (126 MHz, CDCl <sub>3</sub> , 25°C) | δ = 163.3, 136.5, 131.4, 129.1, 128.8, 128.2, 126.0 (q, <i>J</i> = 335 Hz), 124.7, 121.1, 119.9, 103.4 ppm.                                                                                                        |
| <sup>19</sup> F NMR (471 MHz, CDCl <sub>3</sub> , 25°C) | δ = -72.3 (s, 3F) ppm.                                                                                                                                                                                             |
| ESI-HRMS                                                | C <sub>11</sub> H <sub>8</sub> F <sub>3</sub> O <sub>2</sub> S (M + H) <sup>+</sup><br>calcd: 261.0197<br>found: 261.0193                                                                                          |
| IR                                                      | 3094, 2928, 1621, 1178, 1118, 821, 744 cm <sup>-1</sup> .                                                                                                                                                          |

### 1-methoxy-4-((trifluoromethyl)sulfinyl)benzene (2e)<sup>[1]</sup>

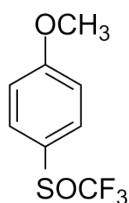

To a solution of (4-methoxyphenyl)(trifluoromethyl)sulfane (112 mg, 0.5 mmol) in 5 mL of solvent TFA at 0 °C was added 30% H<sub>2</sub>O<sub>2</sub> (68 mg, 0.6 mmol). The reaction mixture was stirred at 0 °C for 2 h. Reaction time was determined with GC-MS. After reaction was complete, the reaction mixture was washed with NaHSO<sub>3</sub> and extracted with DCM (3×5 mL). The organic layer was dried over anhydrous Na<sub>2</sub>SO<sub>4</sub> and evaporated under vacuum. The crude reaction was subjected to column chromatography with mobile phase dichloromethane. Solvent was evaporated in vacuo to provide the product (89 mg, 79%) as yellow, viscous liquid.

|                                                         |                                                                                                                          |
|---------------------------------------------------------|--------------------------------------------------------------------------------------------------------------------------|
| yield                                                   | 89 mg, 79%                                                                                                               |
| <sup>1</sup> H NMR (500 MHz, CDCl <sub>3</sub> , 25°C)  | δ = 7.70 (d, <i>J</i> = 8.8 Hz, 2H), 7.07 (d, <i>J</i> = 8.9 Hz, 2H), 3.86 (s, 3H) ppm.                                  |
| <sup>13</sup> C NMR (126 MHz, CDCl <sub>3</sub> , 25°C) | δ = 164.1, 128.2, 126.2, 124.8 (q, <i>J</i> = 335 Hz), 115.2, 55.7 ppm.                                                  |
| <sup>19</sup> F NMR (471 MHz, CDCl <sub>3</sub> , 25°C) | δ = -75.7 (s, 3F) ppm.                                                                                                   |
| ESI-HRMS                                                | C <sub>8</sub> H <sub>8</sub> F <sub>3</sub> O <sub>2</sub> S (M + H) <sup>+</sup><br>calcd: 225.0192<br>found: 225.0190 |

### (4-((trifluoromethyl)sulfinyl)phenyl)methanol (2f)

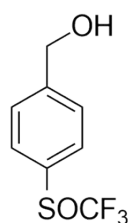

To a solution of (4-((trifluoromethyl)thio)phenyl)methanol (104 mg, 0.5 mmol) in 2 mL of solvent TFA at 0 °C was added 30% H<sub>2</sub>O<sub>2</sub> (68 mg, 0.6 mmol). The reaction mixture was stirred at 0 °C for 5.5 h. and at 25 °C for 1 h. Reaction time was determined with GC-MS. After that the reaction mixture was washed with NaHSO<sub>3</sub>. The solvent was evaporated under vacuum. To the reaction mixture were added MeCN and distilled water. The solution was stirred at 25 °C for 24 h. After reaction was complete, the reaction mixture was extracted with DCM (3×5 mL). The organic layer was dried over anhydrous Na<sub>2</sub>SO<sub>4</sub> and evaporated under vacuum to provide the product (102 mg, 91%) as colorless, viscous liquid.

|                                                         |                                                                                                                          |
|---------------------------------------------------------|--------------------------------------------------------------------------------------------------------------------------|
| yield                                                   | 102 mg, 91%                                                                                                              |
| <sup>1</sup> H NMR (500 MHz, CDCl <sub>3</sub> , 25°C)  | δ = 7.78 (d, <i>J</i> = 8.5 Hz, 2H), 7.62 (d, <i>J</i> = 8.5 Hz, 2H), 4.83 (s, 2H), 2.96 (s, 1H) ppm.                    |
| <sup>13</sup> C NMR (126 MHz, CDCl <sub>3</sub> , 25°C) | δ = 147.1, 134.3, 127.6, 126.2, 124.6 (q, <i>J</i> = 333 Hz), 64.2 ppm.                                                  |
| <sup>19</sup> F NMR (471 MHz, CDCl <sub>3</sub> , 25°C) | δ = -75.0 (s, 3F) ppm.                                                                                                   |
| ESI-HRMS                                                | C <sub>8</sub> H <sub>8</sub> F <sub>3</sub> O <sub>2</sub> S (M + H) <sup>+</sup><br>calcd: 225.0192<br>found: 225.0191 |
| IR                                                      | 3416, 2876, 1780, 1447, 1172, 1131, 807, 652 cm <sup>-1</sup> .                                                          |



### 1-bromo-4-((trifluoromethyl)sulfinyl)benzene (2g)

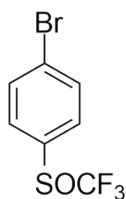

To a solution of (4-bromophenyl)(trifluoromethyl)sulfane (129 mg, 0.5 mmol) in 2 mL of solvent TFA at 0 °C was added 30% H<sub>2</sub>O<sub>2</sub> (68 mg, 0.6 mmol). The reaction mixture was stirred at 0 °C for 8.5 h and at 25 °C for 40 min. Reaction time was determined with GC-MS. After reaction was complete, the reaction mixture was washed with NaHSO<sub>3</sub> and extracted with DCM (3×5 mL). The organic layer was dried over anhydrous Na<sub>2</sub>SO<sub>4</sub> and evaporated under vacuum to provide the product (130 mg, 95%) as colorless, viscous liquid.

|                                                         |                                                                                                              |
|---------------------------------------------------------|--------------------------------------------------------------------------------------------------------------|
| yield                                                   | 130 mg, 95%                                                                                                  |
| <sup>1</sup> H NMR (500 MHz, CDCl <sub>3</sub> , 25°C)  | δ = 7.77 (d, <i>J</i> = 8.5 Hz, 2H), 7.67 (d, <i>J</i> = 8 Hz, 2H) ppm.                                      |
| <sup>13</sup> C NMR (126 MHz, CDCl <sub>3</sub> , 25°C) | δ = 134.7, 133.0, 128.7, 127.4, 124.4 (q, <i>J</i> = 333 Hz) ppm.                                            |
| <sup>19</sup> F NMR (471 MHz, CDCl <sub>3</sub> , 25°C) | δ = -74.9 (s, 3F) ppm.                                                                                       |
| ESI-HRMS                                                | C <sub>7</sub> H <sub>5</sub> BrF <sub>3</sub> OS (M + H) <sup>+</sup><br>calcd: 272.9191<br>found: 272.9189 |
| IR                                                      | 3081, 2919, 1570, 1470, 1388, 1130, 1058, 726 cm <sup>-1</sup> .                                             |

### 4-(*tert*-butyl)-2-((trifluoromethyl)sulfinyl)phenol (2h)

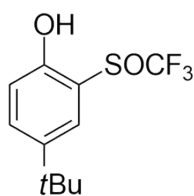

To a solution of 4-(*tert*-butyl)-2-((trifluoromethyl)thio)phenol (133 mg, 0.5 mmol) in 5 mL of solvent TFA at 0 °C was added 30% H<sub>2</sub>O<sub>2</sub> (68 mg, 0.6 mmol). The reaction mixture was stirred at 0 °C for 3 h. Reaction time was determined with GC-MS. After reaction was complete, the reaction mixture was washed with NaHSO<sub>3</sub> and extracted with DCM (3×5 mL). The organic layer was dried over anhydrous Na<sub>2</sub>SO<sub>4</sub> and evaporated under vacuum. The crude reaction was subjected to column chromatography with mobile phase dichloromethane. Solvent was evaporated in vacuo to provide the product (102 mg, 77%) as brown, viscous liquid.

|                                                         |                                                                                                                                              |
|---------------------------------------------------------|----------------------------------------------------------------------------------------------------------------------------------------------|
| yield                                                   | 102 mg, 77%                                                                                                                                  |
| <sup>1</sup> H NMR (500 MHz, CDCl <sub>3</sub> , 25°C)  | δ = 9.18 (s, 1H), 7.55 (dd, <i>J</i> = 8.8, 2.4 Hz, 1H), 7.19 (d, <i>J</i> = 2.1 Hz, 1H), 6.95 (d, <i>J</i> = 8.8 Hz, 1H), 1.29 (s, 9H) ppm. |
| <sup>13</sup> C NMR (126 MHz, CDCl <sub>3</sub> , 25°C) | δ = 158.8, 143.9, 133.2, 125.2 (q, <i>J</i> = 336 Hz), 123.6, 119.6, 113.0, 34.5, 31.3 ppm.                                                  |
| <sup>19</sup> F NMR (471 MHz, CDCl <sub>3</sub> , 25°C) | δ = -74.0 (s, 3F) ppm.                                                                                                                       |
| ESI-HRMS                                                | C <sub>11</sub> H <sub>14</sub> F <sub>3</sub> O <sub>2</sub> S (M + H) <sup>+</sup><br>calcd: 267.0661<br>found: 267.0664                   |
| GC-MS                                                   | 266 (M, 20 %), 197 (100 %), 182 (48 %), 149 (20 %).                                                                                          |

#### 4-bromo-2-((trifluoromethyl)sulfinyl)phenol (2i)

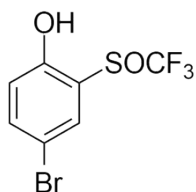

To a solution of 4-bromo-2-((trifluoromethyl)thio)phenol (145 mg, 0.5 mmol) in 5 mL of solvent TFA at 0 °C was added 30% H<sub>2</sub>O<sub>2</sub> (68 mg, 0.6 mmol). The reaction mixture was stirred at 0 °C for 4 h. Reaction time was determined with GC-MS. After reaction was complete, the reaction mixture was washed with NaHSO<sub>3</sub> and extracted with DCM (3×5 mL). The organic layer was dried over anhydrous Na<sub>2</sub>SO<sub>4</sub> and evaporated under vacuum. The crude reaction was subjected to column chromatography with mobile phase dichloromethane. Solvent was evaporated in vacuo to provide the product (124 mg, 86%) as brown solid. Mp 131.4–135.6 °C (Mp<sub>lit</sub> = 140.0 °C).<sup>[3]</sup>

|                                                         |                                                                                                                                |
|---------------------------------------------------------|--------------------------------------------------------------------------------------------------------------------------------|
| yield                                                   | 124 mg, 86%                                                                                                                    |
| <sup>1</sup> H NMR (500 MHz, CDCl <sub>3</sub> , 25°C)  | δ = 9.29 (s, 1H), 7.60 (dd, <i>J</i> = 8.9, 2.4 Hz, 1H), 7.38 (d, <i>J</i> = 2.1 Hz, 1H), 6.91 (d, <i>J</i> = 8.9 Hz, 1H) ppm. |
| <sup>13</sup> C NMR (126 MHz, CDCl <sub>3</sub> , 25°C) | δ = 160.0, 138.5, 129.6, 125.2 (q, <i>J</i> = 336 Hz), 121.8, 115.6, 112.3 ppm.                                                |
| <sup>19</sup> F NMR (471 MHz, CDCl <sub>3</sub> , 25°C) | δ = -73.5 (s, 3F) ppm.                                                                                                         |
| ESI-HRMS                                                | C <sub>7</sub> H <sub>5</sub> BrF <sub>3</sub> O <sub>2</sub> S (M + H) <sup>+</sup><br>calcd: 288.9140, found: 288.9139       |
| GC-MS                                                   | 290 (M+2, 18 %), 221 (100 %), 193 (24 %), 143 (23 %), 112 (12 %), 95 (26 %), 69 (18 %).                                        |

#### 4-(*tert*-butyl)-1-methyl-2-((trifluoromethyl)sulfinyl)benzene (2j)

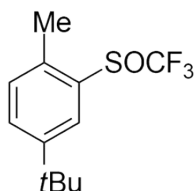

To a solution of (5-(*tert*-butyl)-2-methylphenyl)(trifluoromethyl)sulfane (132 mg, 0.5 mmol) in 5 mL of solvent TFA at 0 °C was added 30% H<sub>2</sub>O<sub>2</sub> (68 mg, 0.6 mmol). The reaction mixture was stirred at 0 °C for 2.5 h. Reaction time was determined with GC-MS. After reaction was complete, the reaction mixture was washed with NaHSO<sub>3</sub> and extracted with DCM (3×5 mL). The organic layer was dried over anhydrous Na<sub>2</sub>SO<sub>4</sub> and evaporated under vacuum. The crude reaction was subjected to column chromatography with mobile phase dichloromethane. Solvent was evaporated in vacuo to provide the product (117 mg, 89%) as colorless, viscous liquid.

|                                                         |                                                                                                                                              |
|---------------------------------------------------------|----------------------------------------------------------------------------------------------------------------------------------------------|
| yield                                                   | 117 mg, 89%                                                                                                                                  |
| <sup>1</sup> H NMR (500 MHz, CDCl <sub>3</sub> , 25°C)  | δ = 8.02 (d, <i>J</i> = 1.3 Hz, 1H), 7.54 (dd, <i>J</i> = 8.0, 2.1 Hz, 1H), 7.24 (d, <i>J</i> = 8.0 Hz, 1H), 2.43 (s, 3H), 1.35 (s, 9H) ppm. |
| <sup>13</sup> C NMR (126 MHz, CDCl <sub>3</sub> , 25°C) | δ = 150.8, 134.9, 133.4, 131.1, 130.4, 125.3 (q, <i>J</i> = 335 Hz), 122.5, 35.0, 31.1, 17.7 ppm.                                            |
| <sup>19</sup> F NMR (471 MHz, CDCl <sub>3</sub> , 25°C) | δ = -74.1 (s, 3F) ppm.                                                                                                                       |
| ESI-HRMS                                                | C <sub>12</sub> H <sub>16</sub> F <sub>3</sub> OS (M + H) <sup>+</sup><br>calcd: 265.0868, found: 265.0869                                   |
| GC-MS                                                   | 264 (M, 10 %), 195 (100 %), 180 (38 %), 165 (14 %), 115 (15 %), 91 (16 %), 69 (15 %), 57 (54 %).                                             |

### 2,6-dimethoxy-3-((trifluoromethyl)sulfinyl)phenol (2k)

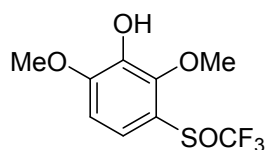

To a solution of 2,6-dimethoxy-4-((trifluoromethyl)thio)phenol (135 mg, 0.5 mmol) in 5 mL of solvent TFA at 0 °C was added 30% H<sub>2</sub>O<sub>2</sub> (68 mg, 0.6 mmol). The reaction mixture was stirred at 0 °C for 5 h. Reaction time was determined with GC-MS. After reaction was complete, the reaction mixture was washed with NaHSO<sub>3</sub> and extracted with DCM (3×5 mL). The organic layer was dried over anhydrous Na<sub>2</sub>SO<sub>4</sub> and evaporated under vacuum. The crude reaction was subjected to column chromatography with mobile phase dichloromethane. Solvent was evaporated in vacuo to provide the product (117 mg, 87%) as brown solid. Mp 116.2–119.1 °C.

|                                                          |                                                                                                                           |
|----------------------------------------------------------|---------------------------------------------------------------------------------------------------------------------------|
| yield                                                    | 117 mg, 87%                                                                                                               |
| <sup>1</sup> H NMR (500 MHz, CDCl <sub>3</sub> , 25 °C)  | δ = 7.42 (d, <i>J</i> = 8.8 Hz, 1H), 6.86 (d, <i>J</i> = 8.8 Hz, 1H), 4.03 (s, 3H), 3.98 (s, 3H) ppm.                     |
| <sup>13</sup> C NMR (126 MHz, CDCl <sub>3</sub> , 25 °C) | δ = 152.0, 145.3, 138.0, 125.1 (q, <i>J</i> = 337 Hz), 120.7, 117.7, 106.6, 61.2, 56.7 ppm.                               |
| <sup>19</sup> F NMR (471 MHz, CDCl <sub>3</sub> , 25 °C) | δ = -75.1 (s, 3F) ppm.                                                                                                    |
| ESI-HRMS                                                 | C <sub>9</sub> H <sub>10</sub> F <sub>3</sub> O <sub>4</sub> S (M + H) <sup>+</sup><br>calcd: 271.0246<br>found: 271.0243 |
| GC-MS                                                    | 270 (M, 10 %), 254 (12 %), 201 (100 %), 143 (13 %), 125 (14 %).                                                           |

### 1,3,5-trimethyl-2-((trifluoromethyl)sulfinyl)benzene (2l)

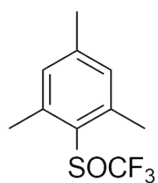

To a solution of mesityl(trifluoromethyl)sulfane (118 mg, 0.5 mmol) in 5 mL of solvent TFA at 0 °C was added 30% H<sub>2</sub>O<sub>2</sub> (68 mg, 0.6 mmol). The reaction mixture was stirred at 0 °C for 15 h. Reaction time was determined with GC-MS. After reaction was complete, the reaction mixture was washed with NaHSO<sub>3</sub> and extracted with DCM (3×5 mL). The organic layer was dried over anhydrous Na<sub>2</sub>SO<sub>4</sub> and evaporated under vacuum. The crude reaction was subjected to column chromatography with mobile phase dichloromethane. Solvent was evaporated in vacuo to provide the product (92 mg, 78%) as colorless, viscous liquid.

|                                                          |                                                                                                              |
|----------------------------------------------------------|--------------------------------------------------------------------------------------------------------------|
| yield                                                    | 92 mg, 78%                                                                                                   |
| <sup>1</sup> H NMR (500 MHz, CDCl <sub>3</sub> , 25 °C)  | δ = 6.93 (s, 2H), 2.55 (s, 6H), 2.32 (s, 3H) ppm.                                                            |
| <sup>13</sup> C NMR (126 MHz, CDCl <sub>3</sub> , 25 °C) | δ = 143.8, 130.7, 127.6, 126.6 (q, <i>J</i> = 338 Hz), 122.6, 21.3, 19.4 ppm.                                |
| <sup>19</sup> F NMR (471 MHz, CDCl <sub>3</sub> , 25 °C) | δ = -70.5 (s, 3F) ppm.                                                                                       |
| ESI-HRMS                                                 | C <sub>10</sub> H <sub>12</sub> F <sub>3</sub> OS (M + H) <sup>+</sup><br>calcd: 237.0555<br>found: 237.0556 |

## 9-((trifluoromethyl)sulfinyl)phenanthrene (2m)

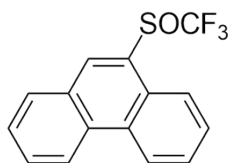

To a solution of phenanthren-9-yl(trifluoromethyl)sulfane (147 mg, 0.5 mmol) in 5 mL of solvent TFA at 0 °C was added 30% H<sub>2</sub>O<sub>2</sub> (68 mg, 0.6 mmol). The reaction mixture was stirred at 0 °C for 15 h. Reaction time was determined with GC-MS. After reaction was complete, the reaction mixture was washed with NaHSO<sub>3</sub> and extracted with DCM (3×5 mL). The organic layer was dried over anhydrous Na<sub>2</sub>SO<sub>4</sub> and evaporated under vacuum. The crude reaction was subjected to column chromatography with mobile phase dichloromethane. Solvent was evaporated in vacuo to provide the product (125 mg, 85%) as brown, viscous liquid.

|                                                         |                                                                                                                                                                                                                                  |
|---------------------------------------------------------|----------------------------------------------------------------------------------------------------------------------------------------------------------------------------------------------------------------------------------|
| yield                                                   | 125 mg, 85%                                                                                                                                                                                                                      |
| <sup>1</sup> H NMR (500 MHz, CDCl <sub>3</sub> , 25°C)  | δ = 8.79 (d, <i>J</i> = 8.3 Hz, 1H), 8.73 (d, <i>J</i> = 8.4 Hz, 1H), 8.61 (s, 1H), 8.14 (d, <i>J</i> = 8.2 Hz, 1H), 8.09 (d, <i>J</i> = 7.9 Hz, 1H), 7.85-7.81 (m, 1H), 7.79 (t, <i>J</i> = 7.7 Hz, 1H), 7.75-7.68 (m, 2H) ppm. |
| <sup>13</sup> C NMR (126 MHz, CDCl <sub>3</sub> , 25°C) | δ = 132.3, 130.9, 130.4, 130.3, 129.9, 129.0, 128.1, 128.0, 128.0, 127.8, 125.4 (q, <i>J</i> = 337 Hz), 123.8, 123.1, 122.9, 122.9 ppm.                                                                                          |
| <sup>19</sup> F NMR (471 MHz, CDCl <sub>3</sub> , 25°C) | δ = -72.9 (s, 3F) ppm.                                                                                                                                                                                                           |
| ESI-HRMS                                                | C <sub>15</sub> H <sub>10</sub> F <sub>3</sub> OS (M + H) <sup>+</sup><br>calcd: 295.0399, found: 295.0400                                                                                                                       |
| GC-MS                                                   | 294 (M, 11 %), 278 (69 %), 225 (100 %), 209 (35 %), 181 (22 %), 165 (98 %).                                                                                                                                                      |

### 3-((trifluoromethyl)sulfinyl)-1*H*-indole (2n)

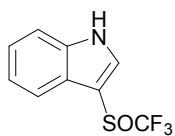

To a solution of 3-((trifluoromethyl)thio)-1*H*-indole (108 mg, 0.5 mmol) in 5 mL of solvent TFA at 0 °C was added 30% H<sub>2</sub>O<sub>2</sub> (68 mg, 0.6 mmol). The reaction mixture was stirred at 0 °C for 4 h. Reaction time was determined with GC-MS. After reaction was complete, the reaction mixture was washed with NaHSO<sub>3</sub> and extracted with DCM (3×5 mL). The organic layer was dried over anhydrous Na<sub>2</sub>SO<sub>4</sub> and evaporated under vacuum. The crude reaction was subjected to column chromatography with mobile phase heptane/ethyl acetate (2/1). Solvent was evaporated in vacuo to provide the product (38 mg, 33%) as black-brown, viscous liquid.

|                                                         |                                                                                                                                 |
|---------------------------------------------------------|---------------------------------------------------------------------------------------------------------------------------------|
| yield                                                   | 38 mg, 33%                                                                                                                      |
| <sup>1</sup> H NMR (500 MHz, CDCl <sub>3</sub> , 25°C)  | δ = 7.98 (d, J = 8.0 Hz, 1H), 7.82 (d, J = 3.1 Hz, 1H), 7.52 (d, J = 8.0 Hz, 1H), 7.40 – 7.36 (m, 1H), 7.34 – 7.31 (m, 1H) ppm. |
| <sup>13</sup> C NMR (126 MHz, CDCl <sub>3</sub> , 25°C) | 136.7, 130.3, 127.0, 124.7, 124.5 (q, J = 337 Hz), 122.9, 120.6, 112.4, 109.4 ppm.                                              |
| <sup>19</sup> F NMR (471 MHz, CDCl <sub>3</sub> , 25°C) | δ = -73.78 (s, 3F) ppm.                                                                                                         |
| ESI-HRMS                                                | C <sub>9</sub> H <sub>6</sub> F <sub>3</sub> NOS (M + H) <sup>+</sup><br>calcd: 234.0195<br>found: 234.0195                     |

### 3-((trifluoromethyl)sulfinyl)benzo[*b*]thiophene (2o)

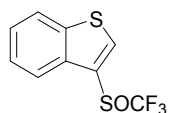

To a solution of 3-((trifluoromethyl)thio)benzo[*b*]thiophene (117 mg, 0.5 mmol) in 5 mL of solvent TFA at 0 °C was added 30% H<sub>2</sub>O<sub>2</sub> (68 mg, 0.6 mmol). The reaction mixture was stirred at 0 °C for 1.5 h. Reaction time was determined with GC-MS. After reaction was complete, the reaction mixture was washed with NaHSO<sub>3</sub> and extracted with DCM (3×5 mL). The organic layer was dried over anhydrous Na<sub>2</sub>SO<sub>4</sub> and evaporated in vacuum. The crude reaction was subjected to column chromatography with mobile phase heptane/ethyl acetate (6/1). Solvent was evaporated in vacuo to provide the product (28 mg, 23%) as white solid.

|                                                         |                                                                                                                         |
|---------------------------------------------------------|-------------------------------------------------------------------------------------------------------------------------|
| yield                                                   | 28 mg, 23%                                                                                                              |
| <sup>1</sup> H NMR (500 MHz, CDCl <sub>3</sub> , 25°C)  | δ = 8.33 (s, 1H), 8.10 (m, 1H), 7.98 (m, 1H), 7.55 – 7.50 (m, 2H) ppm.                                                  |
| <sup>13</sup> C NMR (126 MHz, CDCl <sub>3</sub> , 25°C) | δ = 140.8, 135.0, 134.3, 126.3, 126.3 (q, J = 338 Hz), 126.0, 123.3, 122.6, 122.6 ppm.                                  |
| <sup>19</sup> F NMR (471 MHz, CDCl <sub>3</sub> , 25°C) | δ = -73.4 (s, 3F) ppm.                                                                                                  |
| ESI-HRMS                                                | C <sub>9</sub> H <sub>5</sub> F <sub>3</sub> OS <sub>2</sub> (M + H) <sup>+</sup><br>calcd: 250.9807<br>found: 250.9806 |

### 3-((trifluoromethyl)thio)benzo[*b*]thiophene 1-oxide (2o')

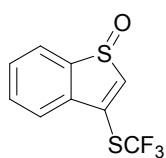

To a solution of 3-((trifluoromethyl)thio)benzo[*b*]thiophene (117 mg, 0.5 mmol) in 5 mL of solvent TFA at 0 °C was added 30% H<sub>2</sub>O<sub>2</sub> (68 mg, 0.6 mmol). The reaction mixture was stirred at 0 °C for 1.5 h. Reaction time was determined with GC-MS. After reaction was complete, the reaction mixture was washed with NaHSO<sub>3</sub> and extracted with DCM (3×5 mL). The organic layer was dried over anhydrous Na<sub>2</sub>SO<sub>4</sub> and evaporated in vacuum. The crude reaction was subjected to column chromatography with mobile phase heptane/ethyl acetate (from 6/1 to 0/1). Solvent was evaporated in vacuo to provide the product (43 mg, 34%) as white solid.

|                                           |                                                                                                                         |
|-------------------------------------------|-------------------------------------------------------------------------------------------------------------------------|
| yield                                     | 43 mg, 34%                                                                                                              |
| <sup>1</sup> H NMR (500 MHz, DMSO, 25°C)  | δ = 8.12 (m, 2H), 7.78 – 7.73 (m, 2H), 7.70 – 7.66 (m, 1H) ppm.                                                         |
| <sup>13</sup> C NMR (126 MHz, DMSO, 25°C) | δ = 144.7, 144.0, 136.2, 133.2, 131.5, 130.4, 129.1 (q, J = 336 Hz), 127.2, 124.0 ppm.                                  |
| <sup>19</sup> F NMR (471 MHz, DMSO, 25°C) | δ = –39.6 (s, 3F) ppm.                                                                                                  |
| ESI-HRMS                                  | C <sub>9</sub> H <sub>5</sub> F <sub>3</sub> OS <sub>2</sub> (M + H) <sup>+</sup><br>calcd: 250.9807<br>found: 250.9811 |

### 3-((trifluoromethyl)thio)-2-((3-((trifluoromethyl)thio)-3*H*-114-benzo[*b*]thiophen-1-yl)oxy)benzo[*b*]thiophene 1-oxide

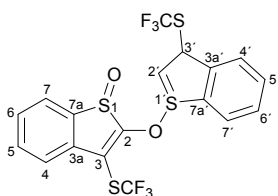

|                                                         |                                                                                                                                                                                                                          |
|---------------------------------------------------------|--------------------------------------------------------------------------------------------------------------------------------------------------------------------------------------------------------------------------|
| the appearance of the sample                            | white solid                                                                                                                                                                                                              |
| <sup>1</sup> H NMR (500 MHz, CDCl <sub>3</sub> , 25°C)  | δ = 8.12 (d, J = 7.8 Hz, 4), 7.99 (d, J = 7.8 Hz, 4'), 7.81 (d, J = 7.8 Hz, 7), 7.77 (m, 5), 7.64 (m, 6), 7.43 (m, 5'), 7.36 (d, J = 6.7 Hz, 2'), 7.29 (m, 6'), 7.08 (d, J = 7.7 Hz, 7'), 4.70 (d, J = 6.7 Hz, 3') ppm.  |
| <sup>13</sup> C NMR (126 MHz, CDCl <sub>3</sub> , 25°C) | δ = 144.3 (3a), 140.0 (7a), 134.9 (2'), 131.9 (5), 131.8 (7a'), 130.4 (5'), 130.2 (6), 130.2 (6'), 129.4 (3a'), 128.9 (q), 128.9 (q), 128.6 (7'), 128.4 (4), 128.2 (3), 127.7 (2), 127.6 (4'), 126.1 (7), 79.2 (3') ppm. |
| <sup>19</sup> F NMR (471 MHz, CDCl <sub>3</sub> , 25°C) | δ = –37.5 (s, 3F), –41.7 (s, 3F) ppm.                                                                                                                                                                                    |
| ESI-HRMS                                                | C <sub>18</sub> H <sub>10</sub> F <sub>6</sub> O <sub>2</sub> S <sub>4</sub> (M + H) <sup>+</sup><br>calcd: 500.9541<br>found: 500.9554                                                                                  |

## Characterization Data for products – One-pot

### 1-((trifluoromethyl)sulfinyl)naphthalen-2-ol (2d)

To a solution of naphthalen-2-ol (72 mg, 0.5 mmol) in 5 mL of DCM was added reagent 4-ClC<sub>6</sub>H<sub>4</sub>NHSCF<sub>3</sub> (126 mg, 0.65 mmol) and TfOH (98 mg, 0.65 mmol). The reagent and TfOH were added in one portion. The reaction mixture was stirred at room temperature for 21 h. Conversion was followed by GC-MS. After reaction was complete to a mixture 5 mL of solvent TFA and 30% H<sub>2</sub>O<sub>2</sub> (85 mg, 0.75 mmol) was added. The reaction mixture was stirred at 25 °C for 8 h. Reaction time was determined with GC-MS. After reaction was complete, the reaction mixture was washed first with water (5 mL), then with NaHSO<sub>3</sub>, with aqueous HCl (5 mL), with water (5 mL) and with aqueous NaHCO<sub>3</sub> (5 mL). The organic layer was dried over anhydrous Na<sub>2</sub>SO<sub>4</sub> and evaporated in vacuum. The crude reaction was subjected to column chromatography with mobile phase hexane/EtOH (9/1). Solvent was evaporated in vacuum to provide the product (102 mg, 78%) as colorless, viscous liquid.

### 1-methoxy-4-((trifluoromethyl)sulfinyl)benzene (2e)<sup>[1]</sup>

To a solution of anisole (54.1 mg, 0.5 mmol) in dichloromethane (5 mL) was reagent 4-ClC<sub>6</sub>H<sub>4</sub>NHSCF<sub>3</sub> (148.0 mg, 0.65 mmol) and the TfOH (58 µL, 0.65 mmol) added slowly in 6 portions every 1 h. The mixture was stirred at room temperature for 20 h. Conversion was checked by GC-MS. After reaction was complete to a mixture 5 mL of solvent TFA and 30% H<sub>2</sub>O<sub>2</sub> (68 mg, 0.6 mmol) was added. The reaction mixture was stirred at 0 °C for 2 h. Reaction time was determined with GC-MS. After reaction was complete, the reaction mixture was washed first with water (5 mL), then with NaHSO<sub>3</sub>, with aqueous HCl (5 mL), with water (5 mL) and with aqueous NaHCO<sub>3</sub> (5 mL). The organic layer was dried over anhydrous Na<sub>2</sub>SO<sub>4</sub> and evaporated in vacuum. The crude reaction was subjected to column chromatography with mobile phase dichloromethane. Solvent was evaporated in vacuo to provide the product (99 mg, 88%) as yellow, viscous liquid.

### 4-(*tert*-butyl)-2-((trifluoromethyl)sulfinyl)phenol (2h)

To a solution of 4-*tert*-butylphenol (75.1 mg, 0.5 mmol) in dichloromethane (5 mL) was reagent 4-ClC<sub>6</sub>H<sub>4</sub>NHSCF<sub>3</sub> (148.0 mg, 0.65 mmol) and the TfOH (58 µL, 0.65 mmol) added slowly in 5 portions every 1 h. The mixture was stirred at room temperature for 20 h. Conversion was checked by GC-MS. After reaction was complete to a mixture 5 mL of solvent TFA and 30% H<sub>2</sub>O<sub>2</sub> (68 mg, 0.6 mmol) was added. The reaction mixture was stirred at 0 °C for 3 h. Reaction time was determined with GC-MS. After reaction was complete, the reaction mixture was washed first with water (5 mL), then with NaHSO<sub>3</sub>, with aqueous HCl (5 mL), with water (5 mL) and with aqueous NaHCO<sub>3</sub> (5 mL). The organic layer was dried over anhydrous Na<sub>2</sub>SO<sub>4</sub> and evaporated in vacuum. The crude reaction was subjected to column chromatography with mobile phase dichloromethane. Solvent was evaporated in vacuo to provide the product (120 mg, 90%) as brown, viscous liquid.

#### **4-bromo-2-((trifluoromethyl)sulfinyl)phenol (2i)<sup>[3]</sup>**

To a solution of 4-bromophenol (86.5 mg, 0.5 mmol) in hexane (5 mL) was reagent 4-ClC<sub>6</sub>H<sub>4</sub>NHSCF<sub>3</sub> (227.7 mg, 1.0 mmol), and the TfOH (134 μL, 1.5 mmol) added slowly in 6 portions every 1 h. The mixture was stirred at room temperature for 20 h. Conversion was checked by GC-MS. After reaction was complete to a mixture 5 mL of solvent TFA and 30% H<sub>2</sub>O<sub>2</sub> (68 mg, 0.6 mmol) was added. The reaction mixture was stirred at 0 °C for 4 h. Reaction time was determined with GC-MS. After reaction was complete, the reaction mixture was washed first with water (5 mL), then with NaHSO<sub>3</sub>, with aqueous HCl (5 mL), with water (5 mL) and with aqueous NaHCO<sub>3</sub> (5 mL). The organic layer was dried over anhydrous Na<sub>2</sub>SO<sub>4</sub> and evaporated in vacuum. The crude reaction was subjected to column chromatography with mobile phase dichloromethane. Solvent was evaporated in vacuo to provide the product (131 mg, 91%) as brown solid.

#### **4-(*tert*-butyl)-1-methyl-2-((trifluoromethyl)sulfinyl)benzene (2j)**

To a solution of 4-*tert*-butyltoluene (74.1 mg, 0.5 mmol) in trifluoroacetic acid (5 mL) was reagent 4-ClC<sub>6</sub>H<sub>4</sub>NHSCF<sub>3</sub> (227.7 mg, 1.0 mmol) and the TfOH (134 μL, 1.5 mmol) added slowly in 6 portions every 1 h. The mixture was stirred at room temperature for 20 h. Conversion was checked by GC-MS. After reaction was complete to a mixture 5 mL of solvent TFA and 30% H<sub>2</sub>O<sub>2</sub> (68 mg, 0.6 mmol) was added. The reaction mixture was stirred at 0 °C for 2.5 h. Reaction time was determined with GC-MS. After reaction was complete, the reaction mixture was washed first with water (5 mL), then with NaHSO<sub>3</sub>, with aqueous HCl (5 mL), with water (5 mL) and with aqueous NaHCO<sub>3</sub> (5 mL). The organic layer was dried over anhydrous Na<sub>2</sub>SO<sub>4</sub> and evaporated in vacuum. The crude reaction was subjected to column chromatography with mobile phase dichloromethane. Solvent was evaporated in vacuum to provide the product (123 mg, 93%) as colorless, viscous liquid.

#### **2,6-dimethoxy-3-((trifluoromethyl)sulfinyl)phenol (2k)**

To a solution of 2,6-dimethoxyphenol (77.1 mg, 0.5 mmol) in dichloromethane (5 mL) was added reagent 4-ClC<sub>6</sub>H<sub>4</sub>NHSCF<sub>3</sub> (148.0 mg, 0.65 mmol) and the TfOH (58 μL, 0.65 mmol). The mixture was stirred at room temperature for 20 h. Conversion was checked by GC-MS. After reaction was complete to a mixture 5 mL of solvent TFA and 30% H<sub>2</sub>O<sub>2</sub> (68 mg, 0.6 mmol) was added. The reaction mixture was stirred at 0 °C for 5 h. Reaction time was determined with GC-MS. After reaction was complete, the reaction mixture was washed first with water (5 mL), then with NaHSO<sub>3</sub>, with aqueous HCl (5 mL), with water (5 mL) and with aqueous NaHCO<sub>3</sub> (5 mL). The organic layer was dried over anhydrous Na<sub>2</sub>SO<sub>4</sub> and evaporated in vacuum. The crude reaction was subjected to column chromatography with mobile phase dichloromethane. Solvent was evaporated in vacuum to provide the product (124 mg, 92%) as brown solid.



### **1,3,5-trimethyl-2-((trifluoromethyl)sulfinyl)benzene (2l)**

To a solution of mesitylene (60.1 mg, 0.5 mmol) in dichloromethane (5 mL) was reagent 4-ClC<sub>6</sub>H<sub>4</sub>NHSCF<sub>3</sub> (148.0 mg, 0.65 mmol) and the TfOH (58 μL, 0.65 mmol) added slowly in 5 portions every 1 h. The mixture was stirred at room temperature for 20 h. Conversion was checked by GC-MS. After reaction was complete to a mixture 5 mL of solvent TFA and 30% H<sub>2</sub>O<sub>2</sub> (68 mg, 0.6 mmol) was added. The reaction mixture was stirred at 0 °C for 15 h. Reaction time was determined with GC-MS. After reaction was complete, the reaction mixture was washed first with water (5 mL), then with NaHSO<sub>3</sub>, with aqueous HCl (5 mL), with water (5 mL) and with aqueous NaHCO<sub>3</sub> (5 mL). The organic layer was dried over anhydrous Na<sub>2</sub>SO<sub>4</sub> and evaporated in vacuum. The crude reaction was subjected to column chromatography with mobile phase dichloromethane. Solvent was evaporated in vacuo to provide the product (101 mg, 86%) as colorless, viscous liquid.

### **9-((trifluoromethyl)sulfinyl)phenanthrene (2m)**

To a solution of phenanthrene (89.0 mg, 0.5 mmol) in dichloromethane (5 mL) was reagent 4-ClC<sub>6</sub>H<sub>4</sub>NHSCF<sub>3</sub> (148.0 mg, 0.65 mmol) and the TfOH (58 μL, 0.65 mmol) added slowly in 6 portions every 1 h. The mixture was stirred at room temperature for 20 h. Conversion was checked by GC-MS. After reaction was complete to a mixture 5 mL of solvent TFA and 30% H<sub>2</sub>O<sub>2</sub> (68 mg, 0.6 mmol) was added. The reaction mixture was stirred at 0 °C for 15 h. Reaction time was determined with GC-MS. After reaction was complete, the reaction mixture was washed first with water (5 mL), then with NaHSO<sub>3</sub>, with aqueous HCl (5 mL), with water (5 mL) and with aqueous NaHCO<sub>3</sub> (5 mL). The organic layer was dried over anhydrous Na<sub>2</sub>SO<sub>4</sub> and evaporated in vacuum. The crude reaction was subjected to column chromatography with mobile phase dichloromethane. Solvent was evaporated in vacuo to provide the product (133 mg, 90%) as brown, viscous liquid.

### **3-((trifluoromethyl)sulfinyl)-1*H*-indole (2n)**

To a solution of 1*H*-indole (59 mg, 0.5 mmol) in dichloromethane (5 mL) was reagent 4-ClC<sub>6</sub>H<sub>4</sub>NHSCF<sub>3</sub> (148.0 mg, 0.65 mmol) and the TfOH (58 μL, 0.65 mmol) added slowly in 3 portions every 1 h. The mixture was stirred at room temperature for 6 h. Conversion was checked by GC-MS. After reaction was complete to a mixture 5 mL of solvent TFA and 30% H<sub>2</sub>O<sub>2</sub> (68 mg, 0.6 mmol) was added. The reaction mixture was stirred at 0 °C for 4 h. Reaction time was determined with GC-MS. After reaction was complete, the reaction mixture was washed first with water (5 mL), then with NaHSO<sub>3</sub>, with aqueous HCl (5 mL), with water (5 mL) and with aqueous NaHCO<sub>3</sub> (5 mL). The organic layer was dried over anhydrous Na<sub>2</sub>SO<sub>4</sub> and evaporated in vacuum. The crude reaction was subjected to column chromatography with mobile phase heptane/ethyl acetate (2/1). Solvent was evaporated in vacuo to provide the product (43 mg, 37%) as black-brown, viscous liquid.

### **3-((trifluoromethyl)sulfinyl)benzo[*b*]thiophene (2o)**

To a solution of benzo[*b*]thiophene (67 mg, 0.5 mmol) in dichloromethane (5 mL) was reagent 4-ClC<sub>6</sub>H<sub>4</sub>NHSCF<sub>3</sub> (148.0 mg, 0.65 mmol) and the TfOH (58 μL, 0.65 mmol) added slowly in 3 portions every 1 h. The mixture was stirred at room temperature for 24 h. Conversion was checked by GC-MS. After reaction was complete to a mixture 5 mL of solvent TFA and 30% H<sub>2</sub>O<sub>2</sub> (68 mg, 0.6 mmol) was added. The reaction mixture was stirred at 0 °C for 1.5 h. Reaction time was determined with GC-MS. After reaction was complete, the reaction mixture was washed first with water (5 mL), then with NaHSO<sub>3</sub>, with aqueous HCl (5 mL), with water (5 mL) and with aqueous NaHCO<sub>3</sub> (5 mL). The organic layer was dried over anhydrous Na<sub>2</sub>SO<sub>4</sub> and evaporated in vacuum. The crude reaction was subjected to column chromatography with mobile phase heptane/ethyl acetate (6/1). Solvent was evaporated in vacuo to provide the product (31 mg, 25%) as white solid.

## The effect of reaction conditions on the oxidation of thianthrene 4

To a suspension of thianthrene 4 (0.5 mmol, 1 equiv.) in 5 mL of solvent (MeCN or TFA) was added oxidant ( $\text{H}_2\text{O}_2$  or *m*-CPBA (0.5 mmol, 1.2 equiv.)). The reaction mixture was stirred for 2.5 or 24 h at 0 °C or rt. After reaction was complete, the reaction mixture was washed with  $\text{NaHSO}_3$ , extracted with DCM (3×5 mL). The organic layer was dried over anhydrous  $\text{Na}_2\text{SO}_4$  and evaporated in vacuo. The crude reaction mixture was analyzed by NMR spectroscopy and product distribution determined from the NMR data in comparison with those in the literature. Results are presented in **Napaka! Vira sklicevanja ni bilo mogoče najti.**

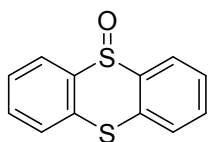

thianthrene 5-oxide (**5**).<sup>[4]</sup>  $^1\text{H}$  NMR (500 MHz,  $\text{CDCl}_3$ , 25 °C):  $\delta$  7.94 (d,  $J$  = 7.8 Hz, 2H), 7.63 (d,  $J$  = 7.6 Hz, 2H), 7.56 (m, 2H), 7.43 (m, 2H).

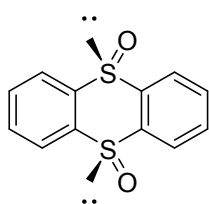

*cis*-thianthrene 5,10-dioxide (**6a**).<sup>[4]</sup>  $^1\text{H}$  NMR (500 MHz,  $\text{CDCl}_3$ , 25 °C):  $\delta$  8.07-8.09 (m, 4H), 7.72-7.74 (m, 4H).

*trans*-  
 $\text{CDCl}_3$ , 25 °C):

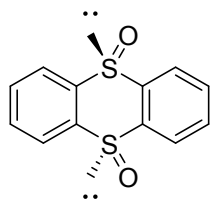

thianthrene 5,10-dioxide (**6b**).<sup>[4]</sup>  $^1\text{H}$  NMR (500 MHz,  $\delta$  8.10-8.11 (m, 4H), 7.66-7.67 (m, 4H).

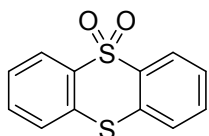

thianthrene 5,5-dioxide (**7**).<sup>[4]</sup>  $^1\text{H}$  NMR (500 MHz,  $\text{CDCl}_3$ , 25 °C):  $\delta$  8.26-8.20 (m, 2H), 7.75-7.61 (m, 2H), 7.59-7.53 (m, 4H).

# 1H, 13C and 19F spectra

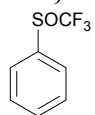

2a

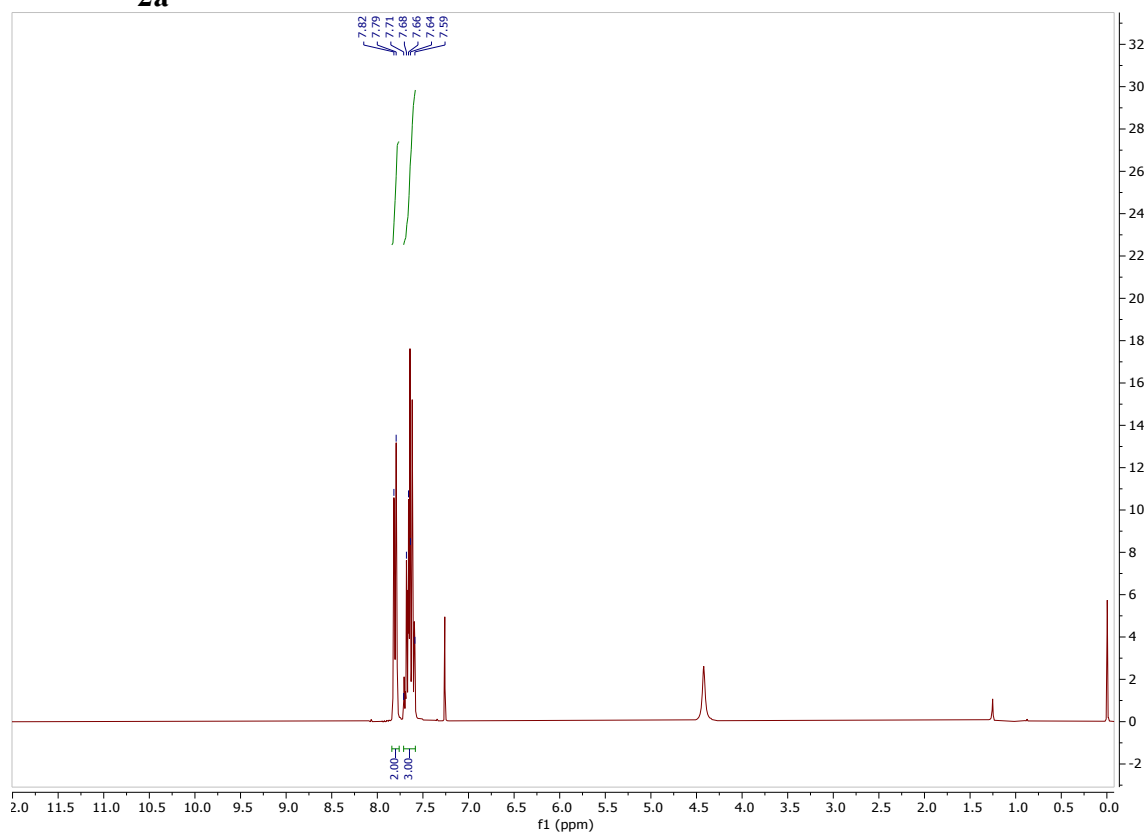

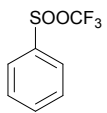

**3a**

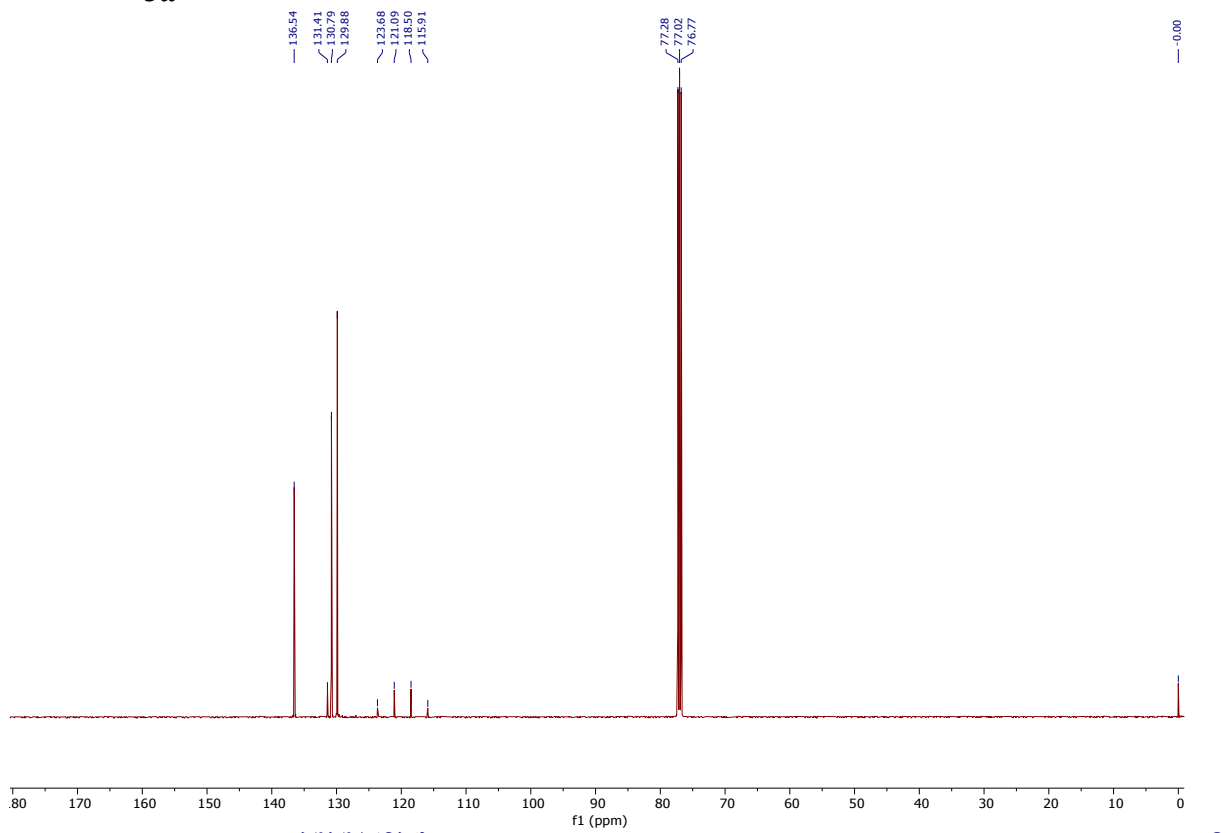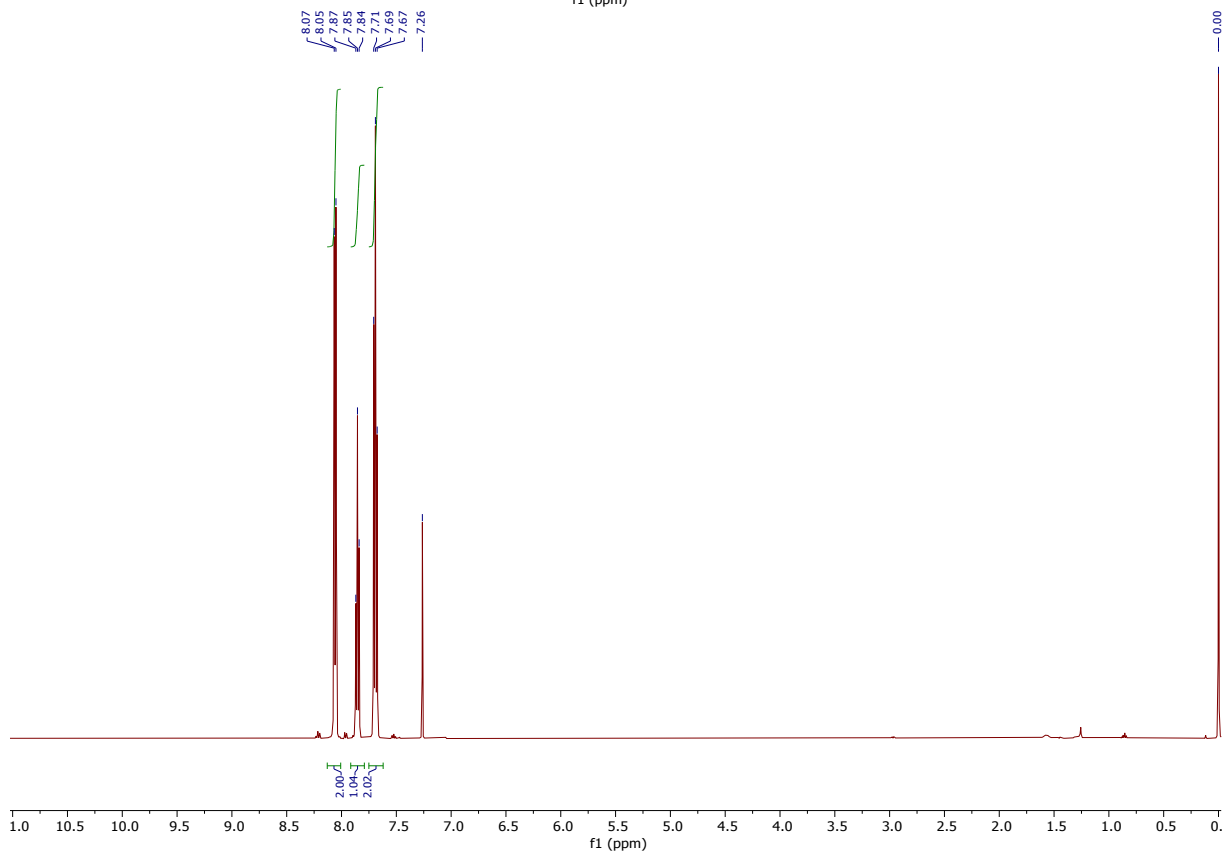

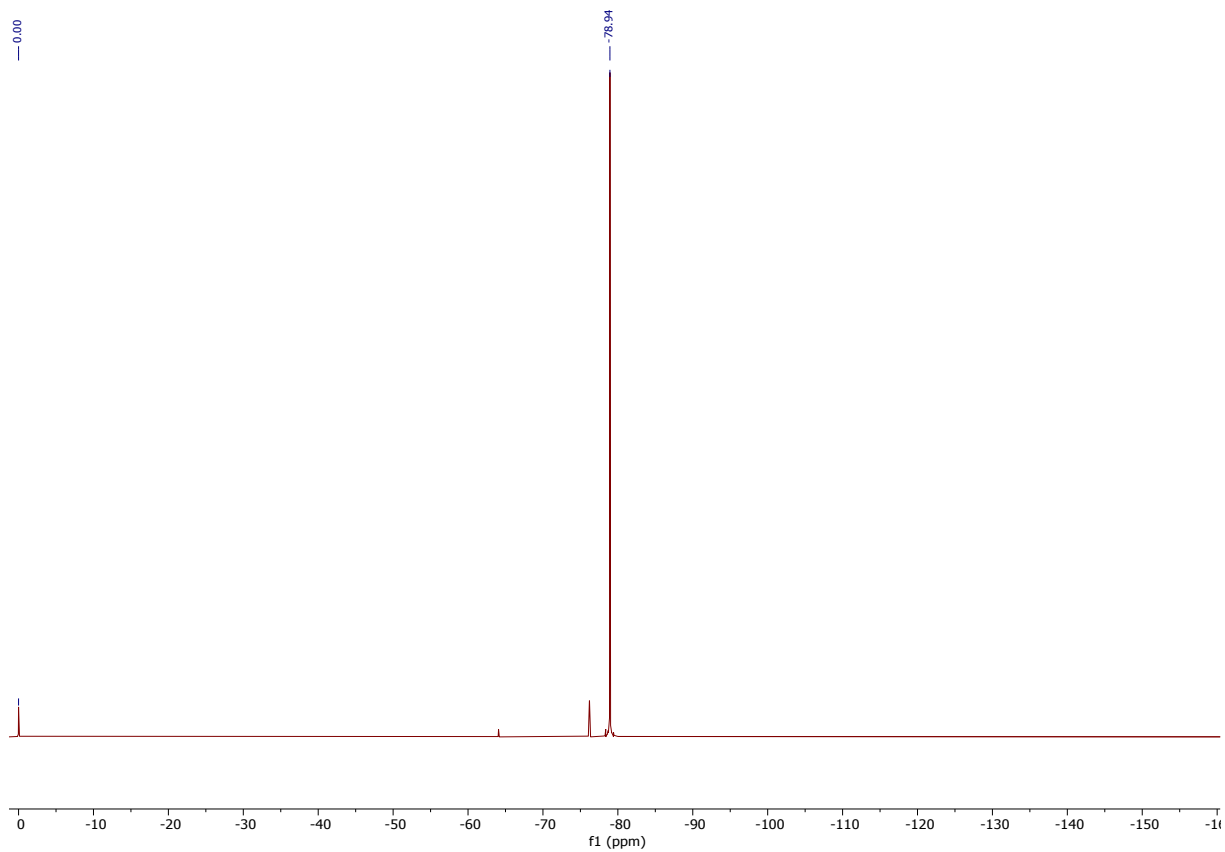

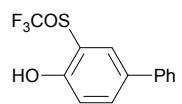

**2b**

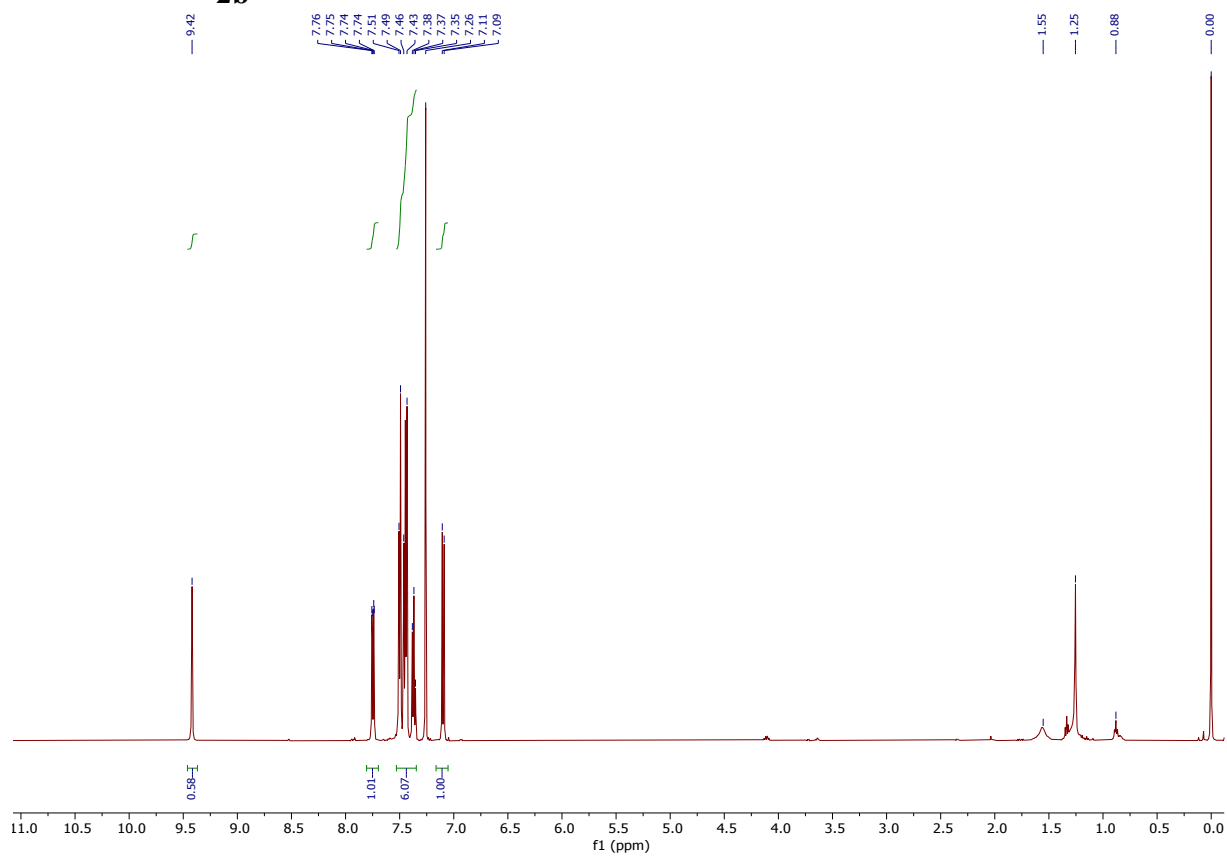

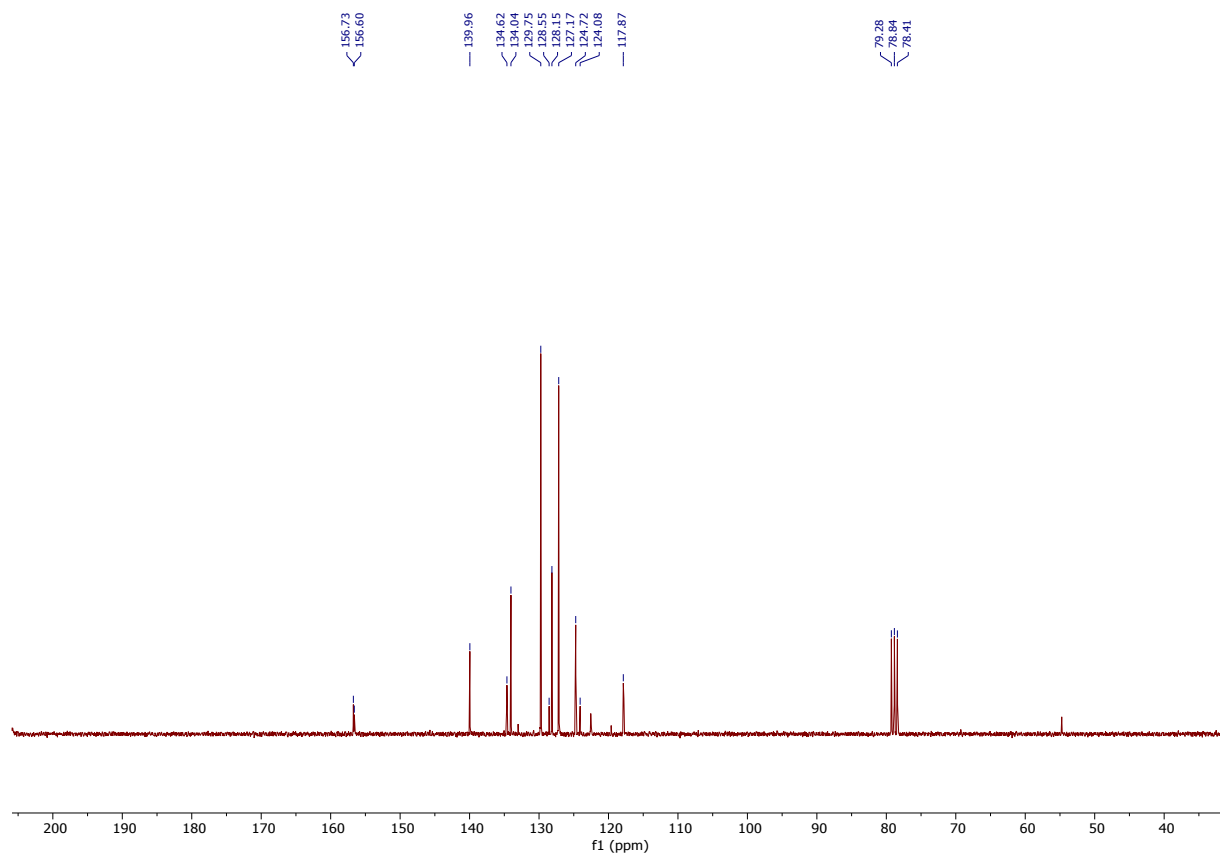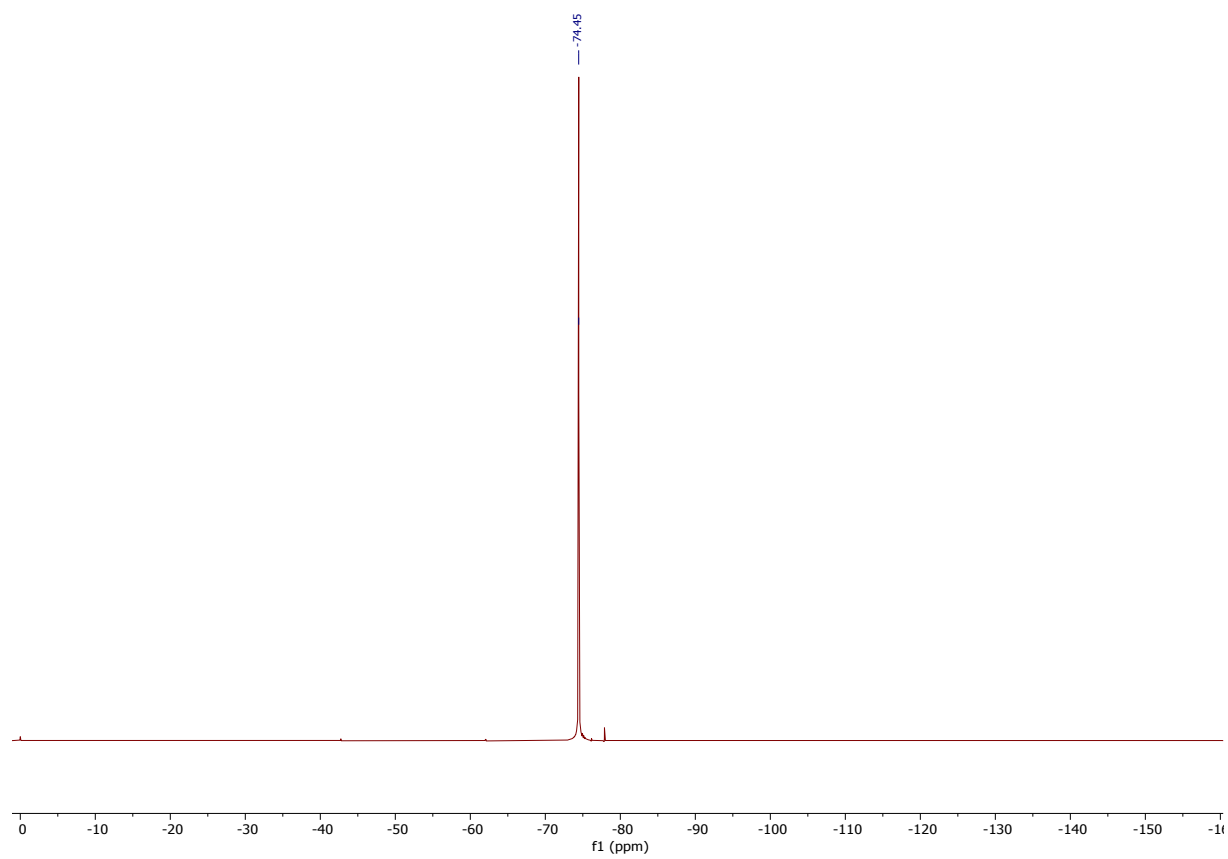



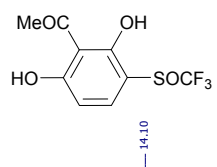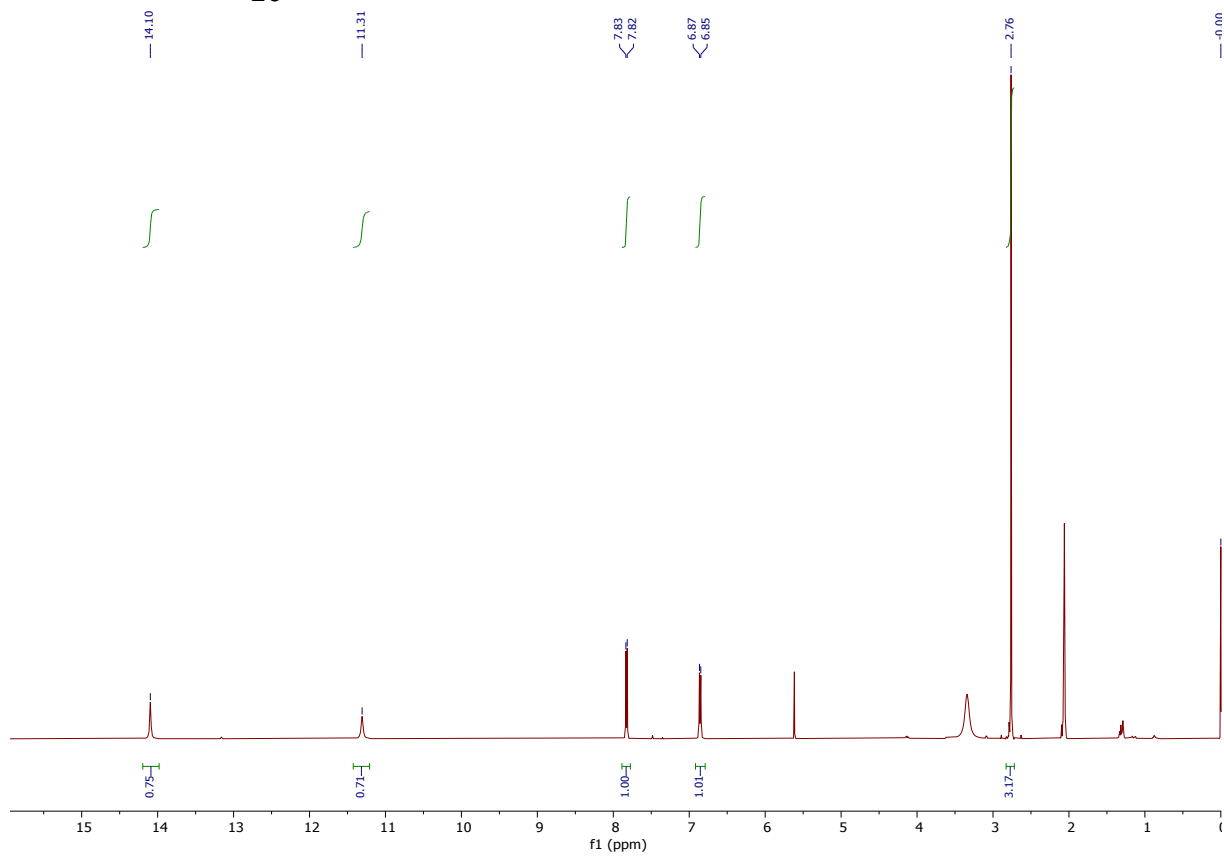

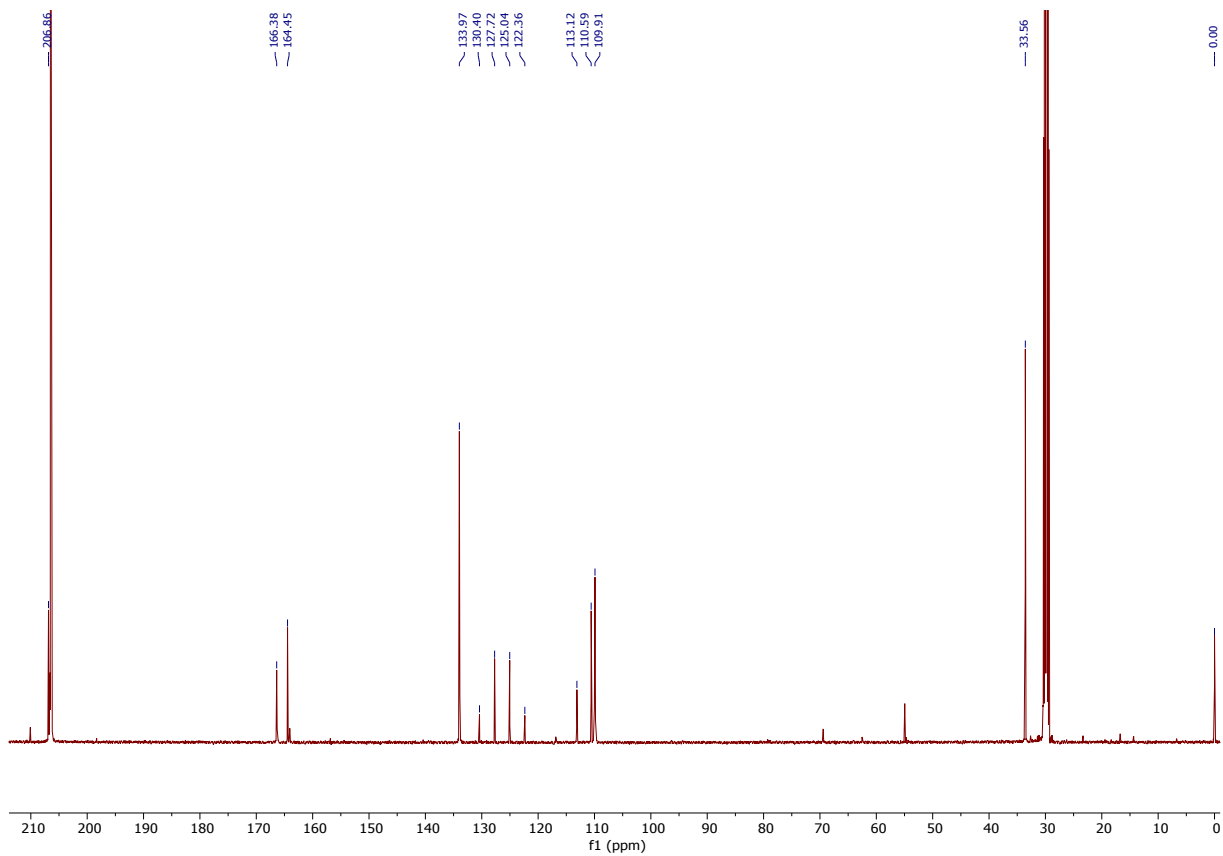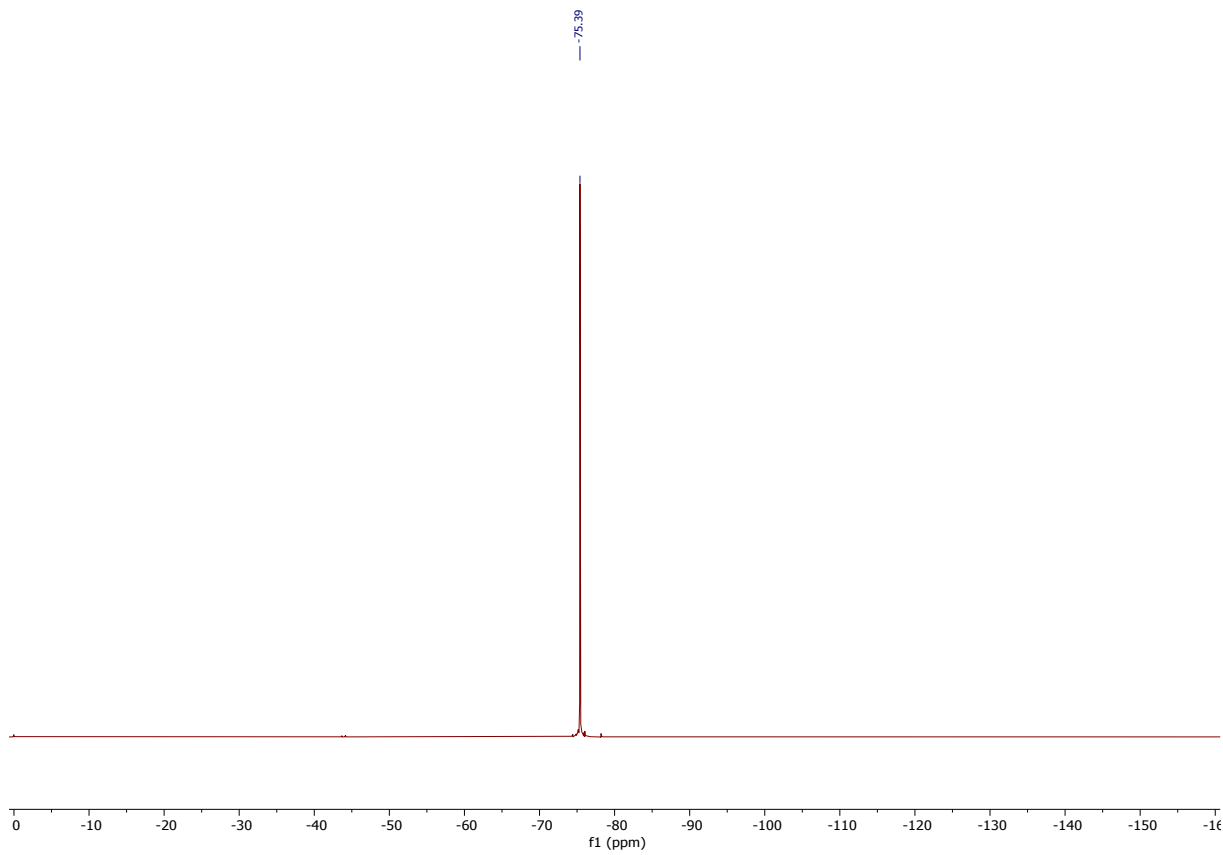

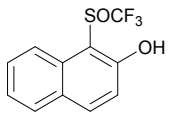

2d

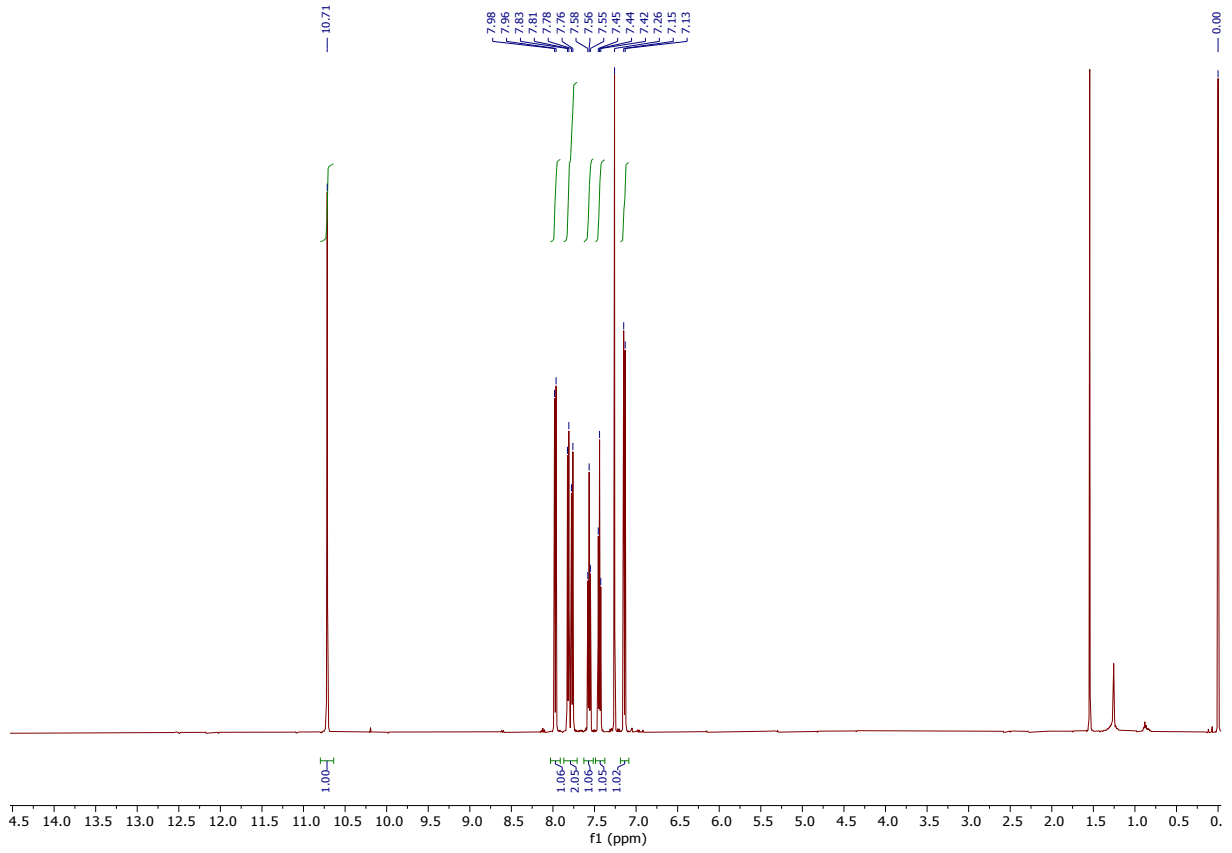

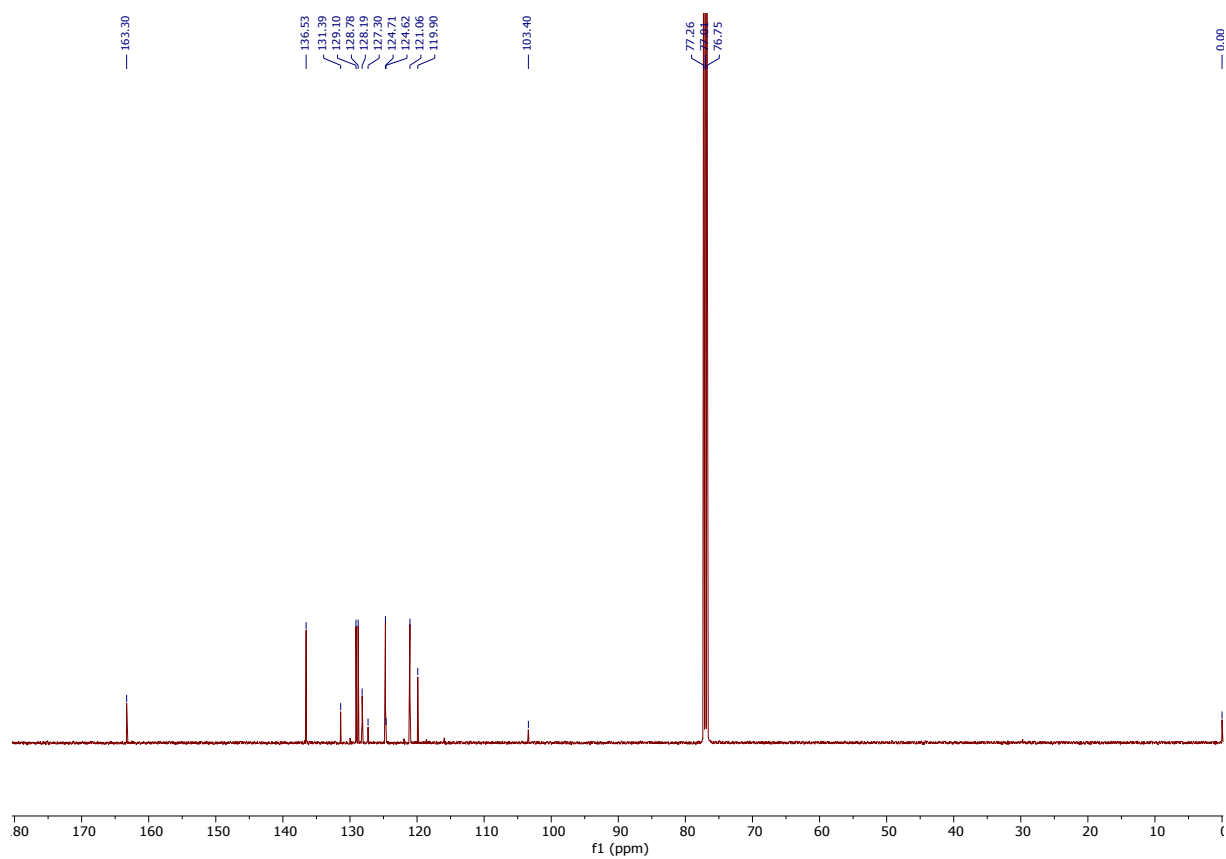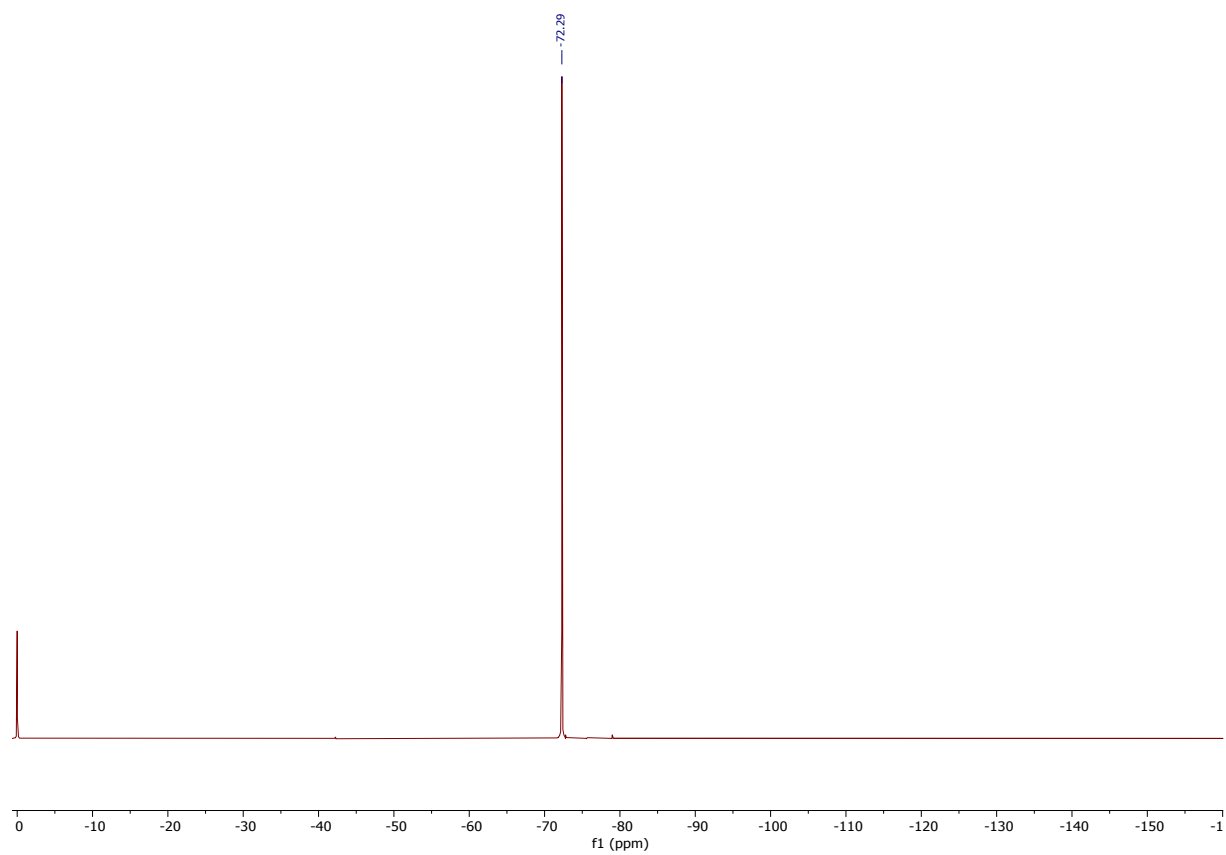

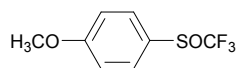

2e

hm249a  
hm249a

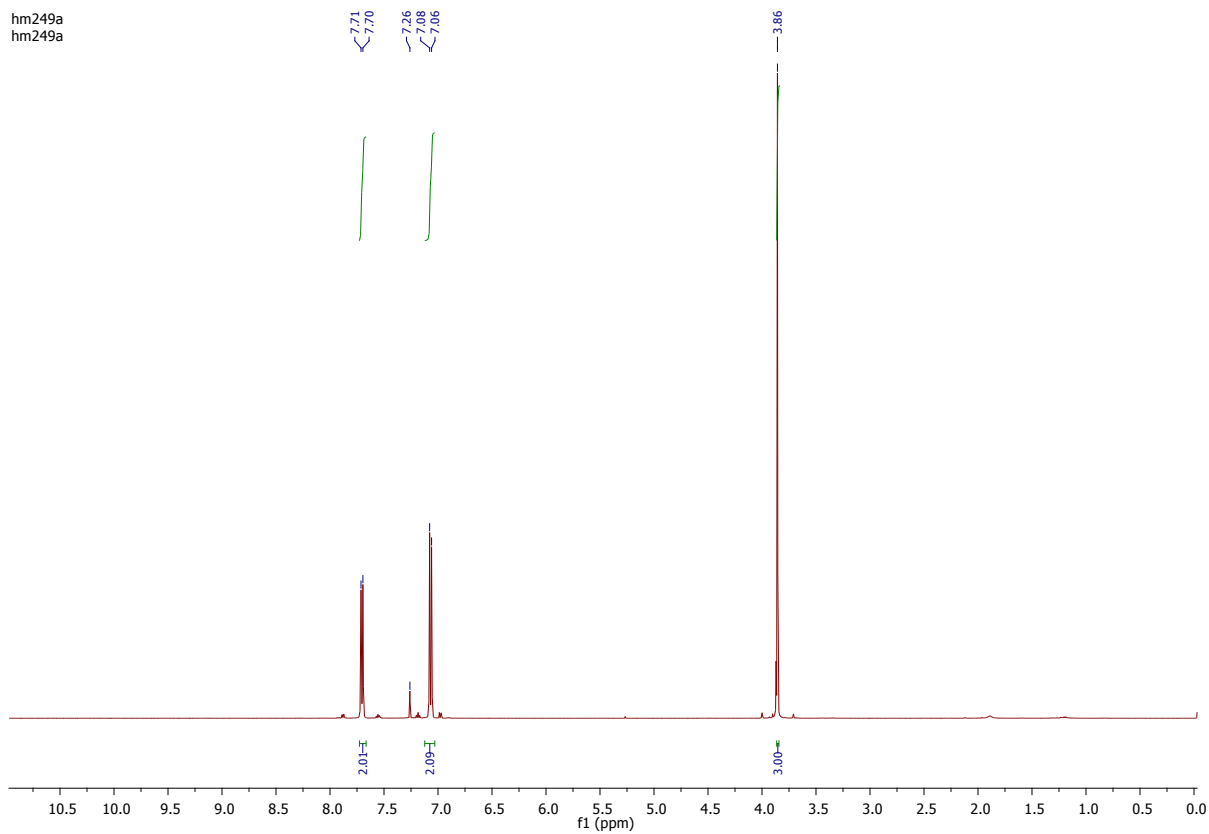

hm249a  
hm249a

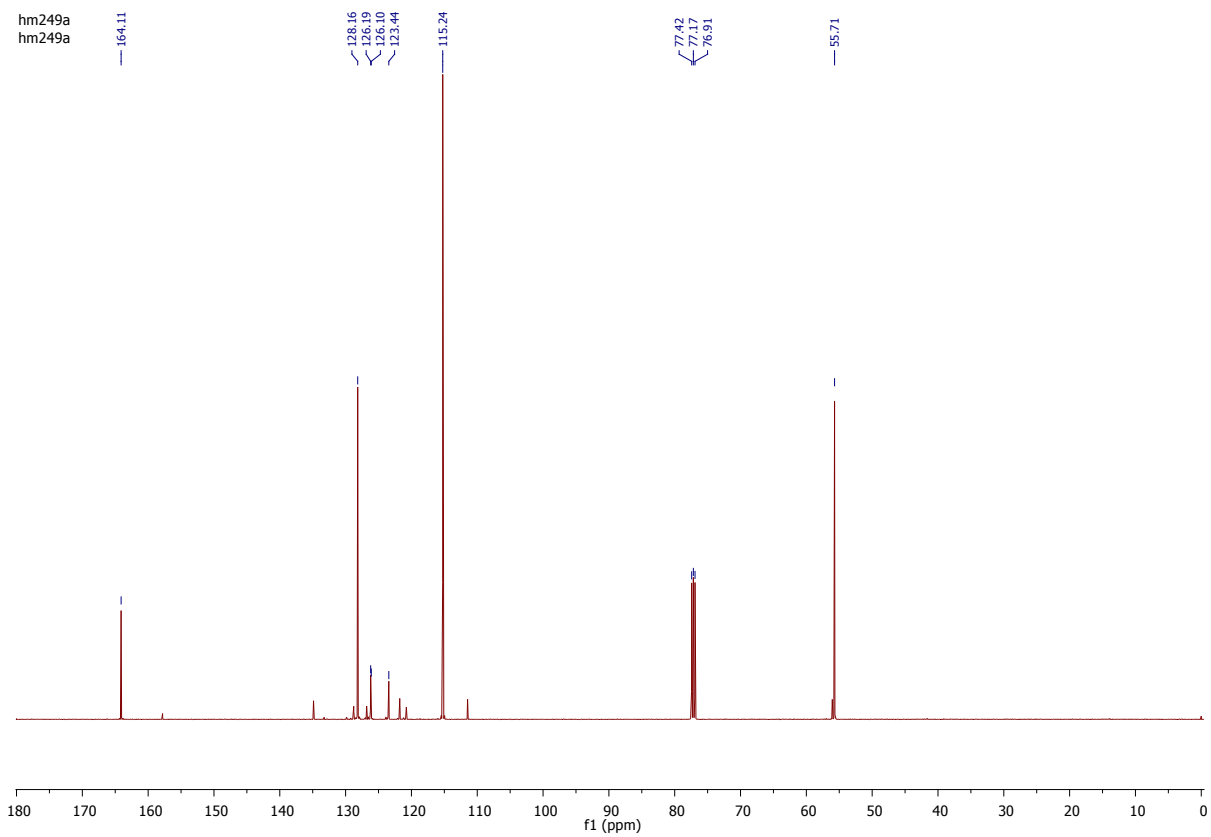

hm249a  
hm249a

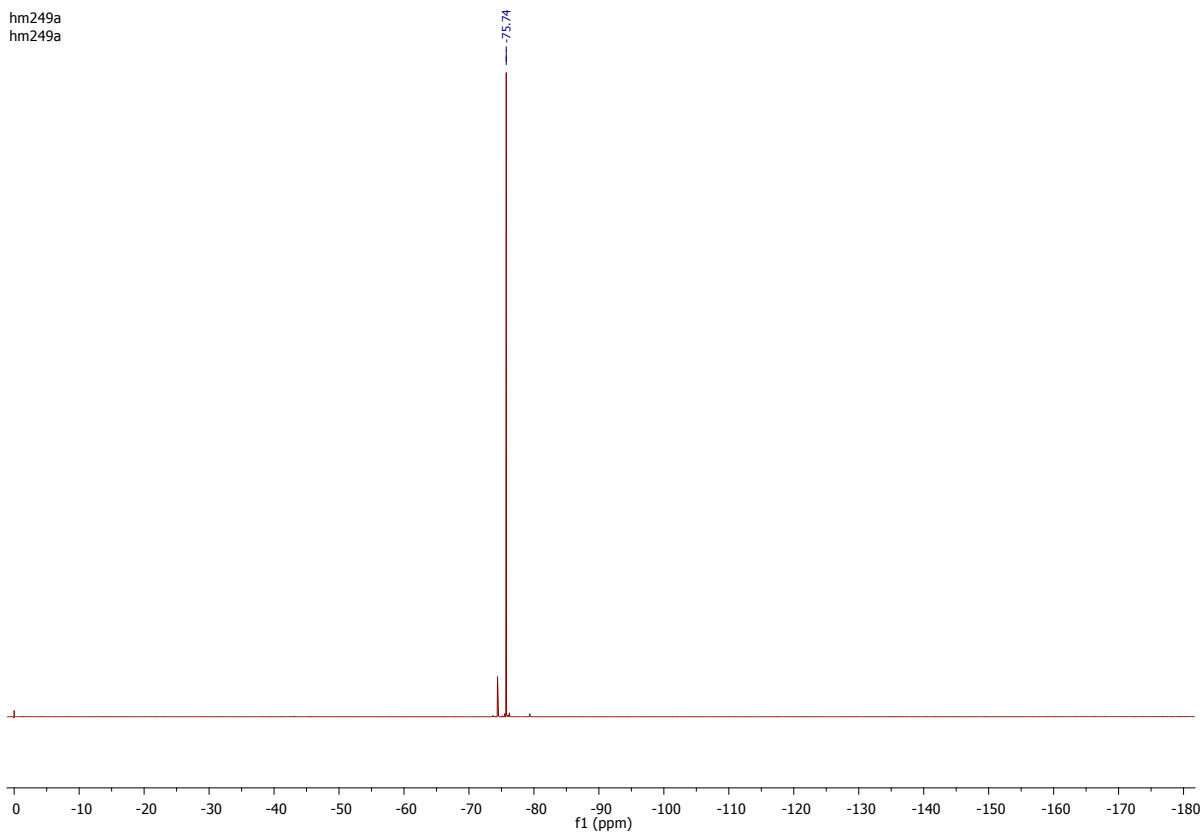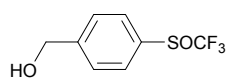

**2f**

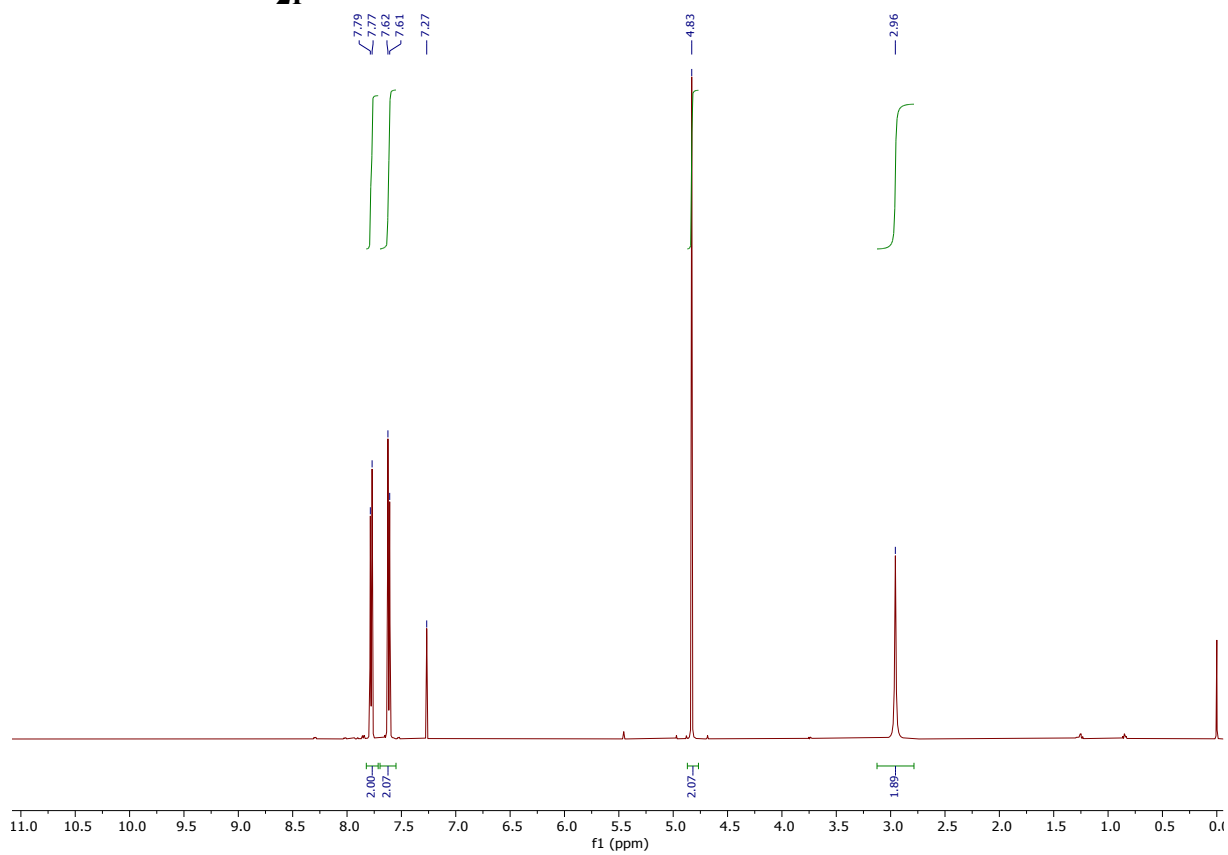

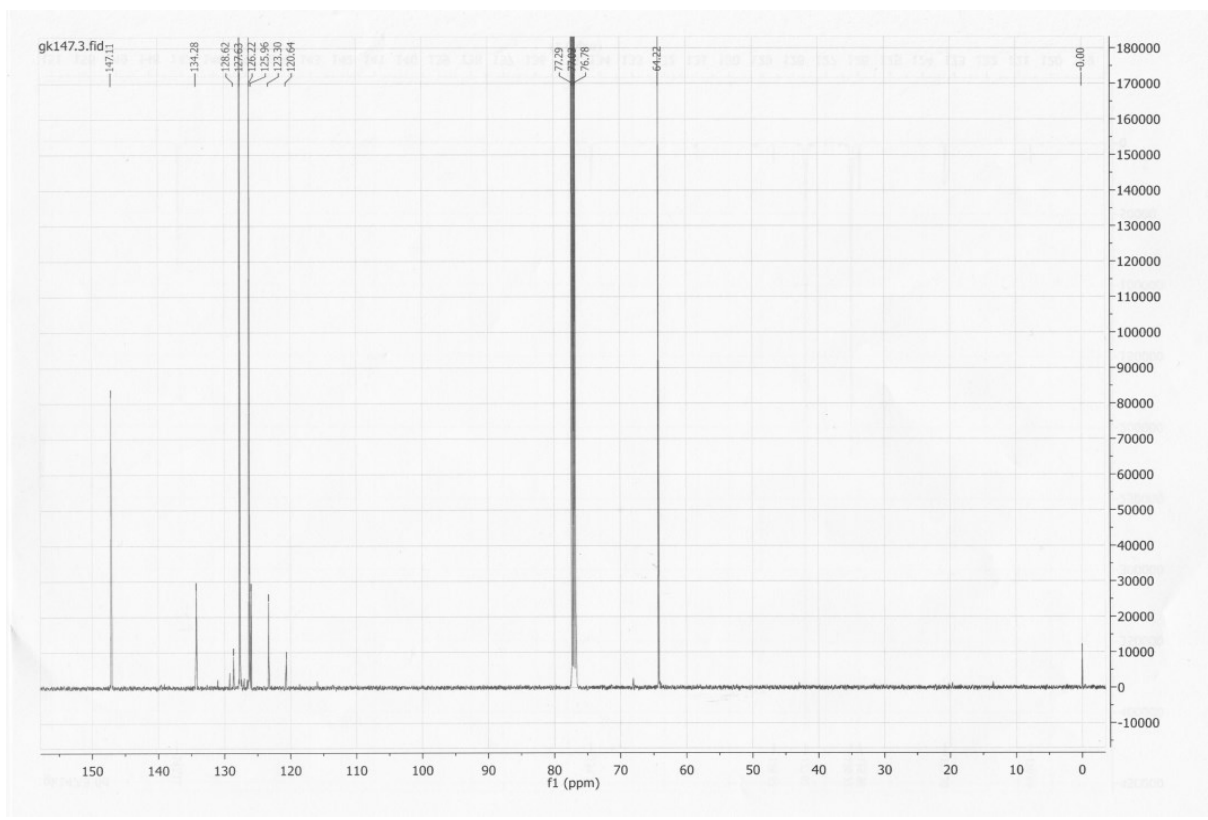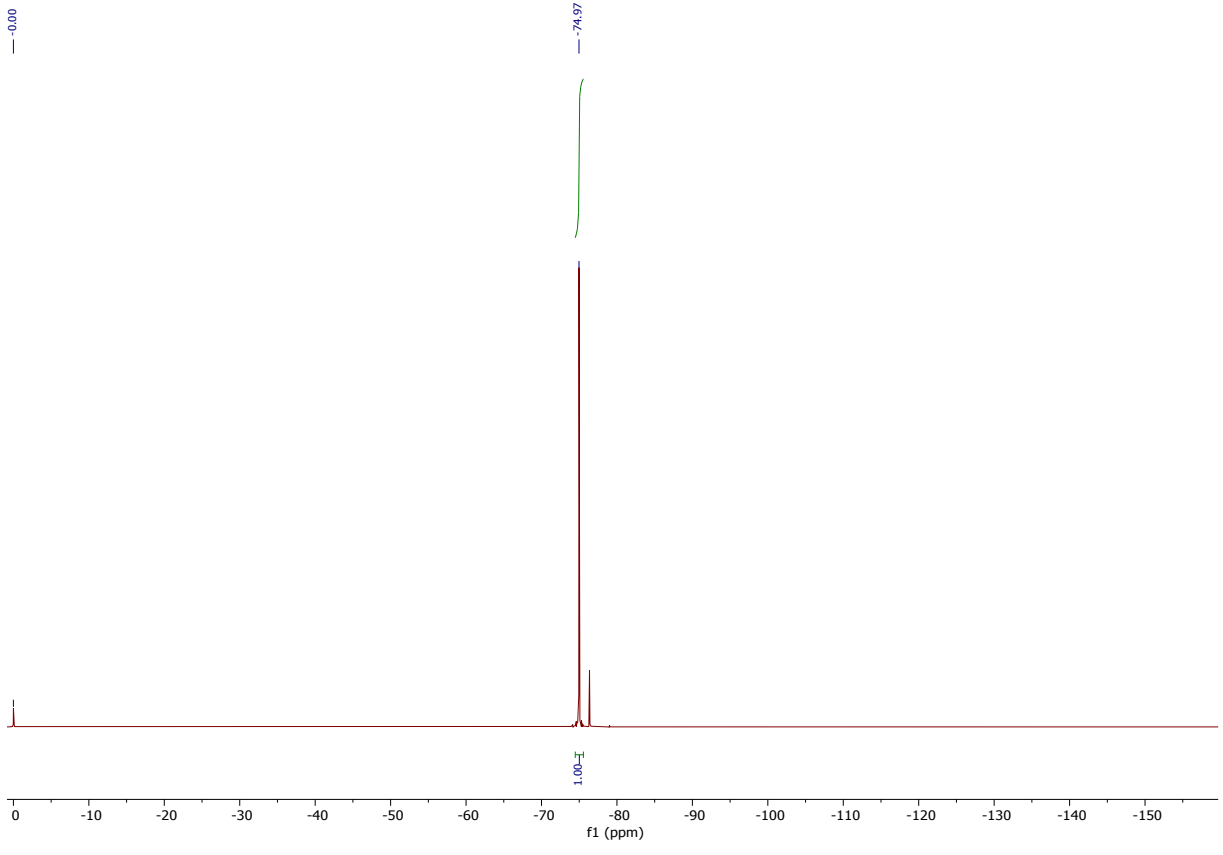

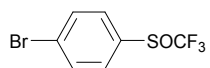

2g

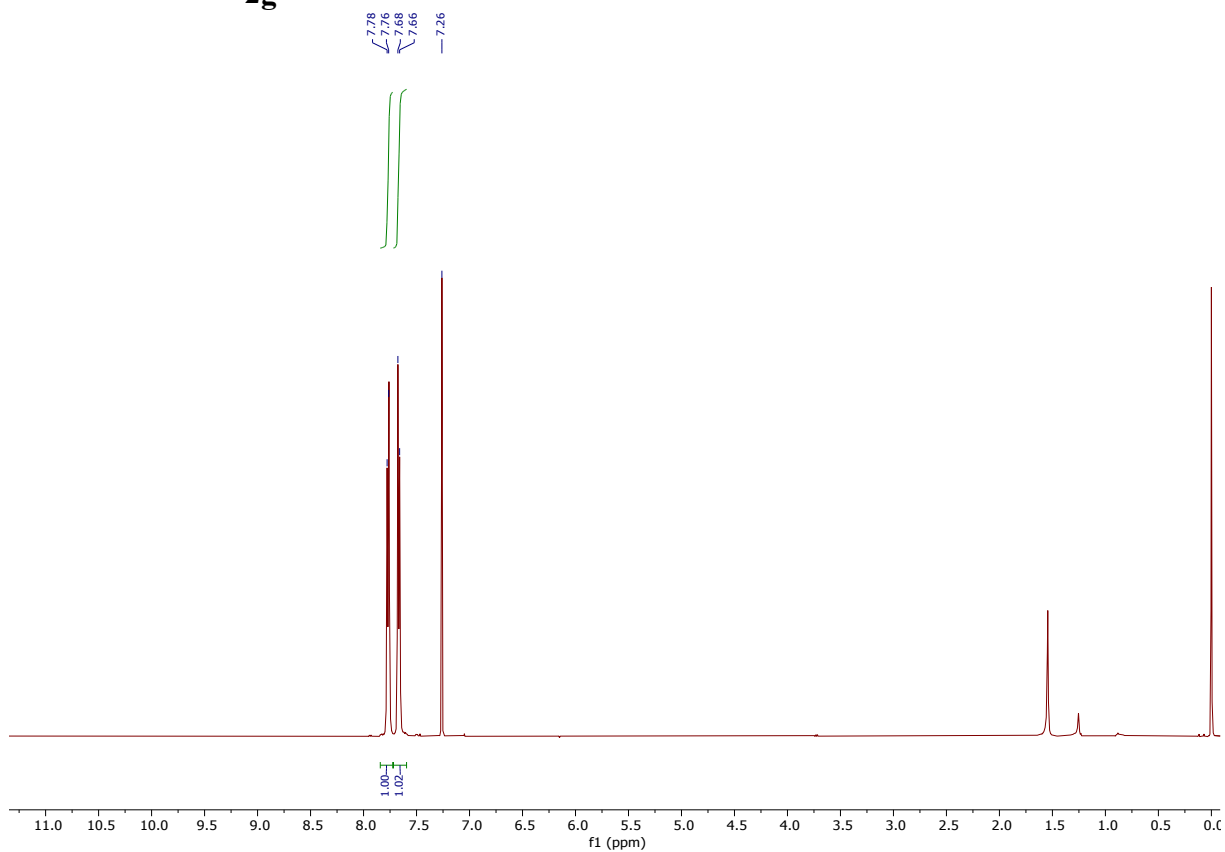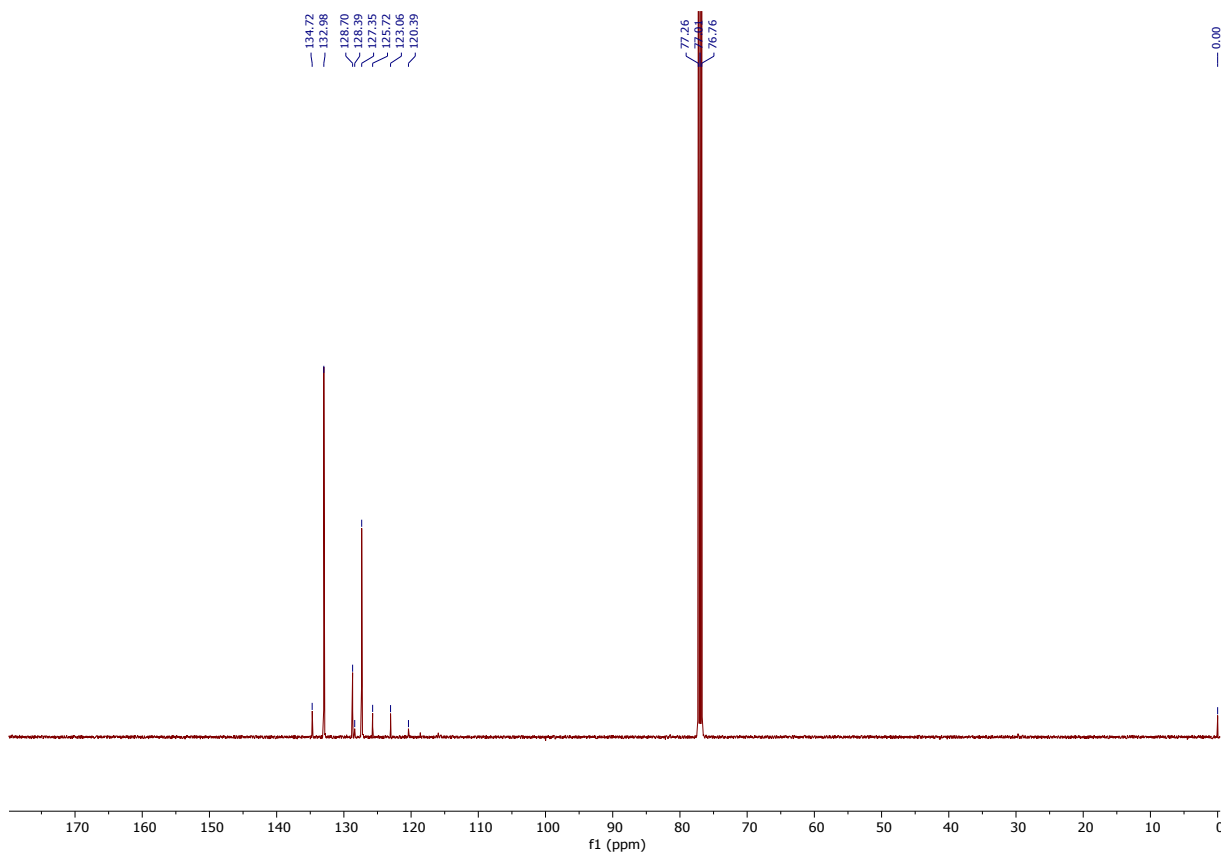



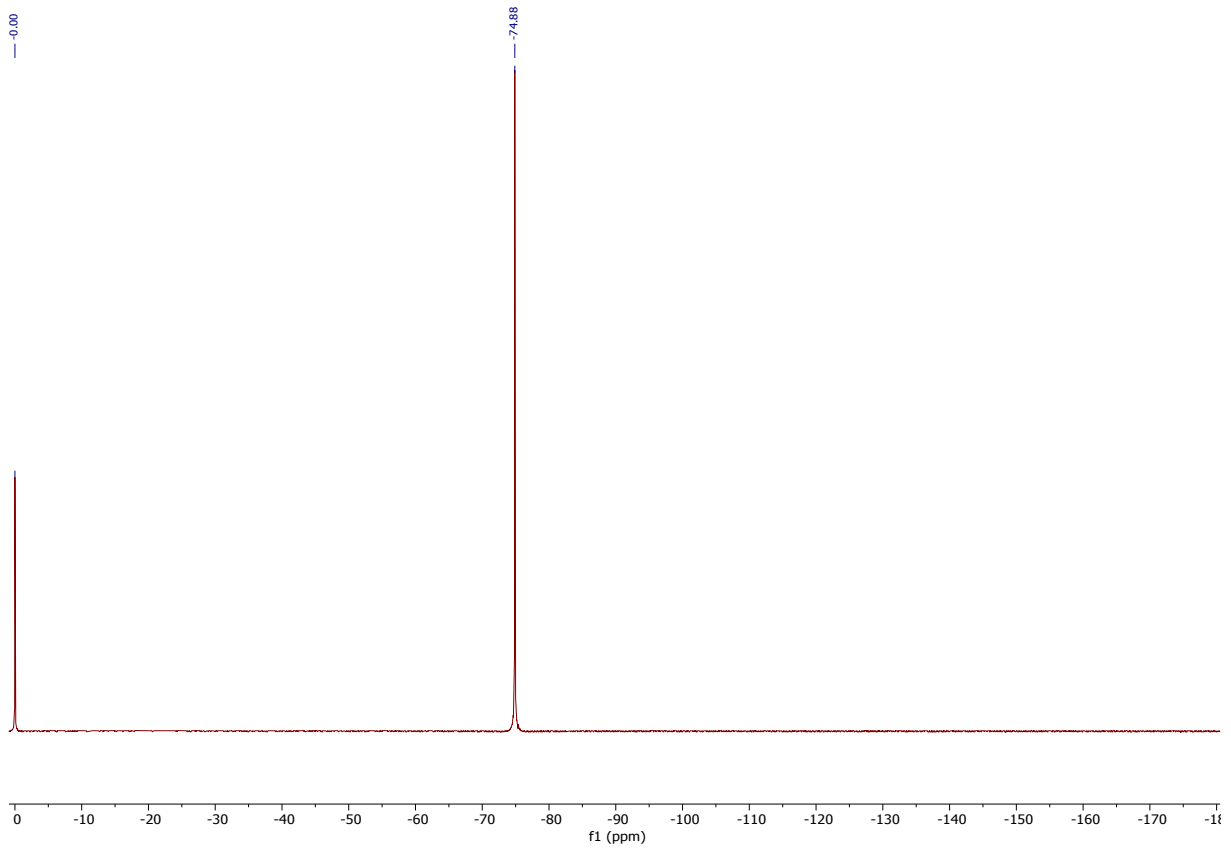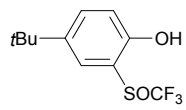

**2h**

hm126c  
hm126c

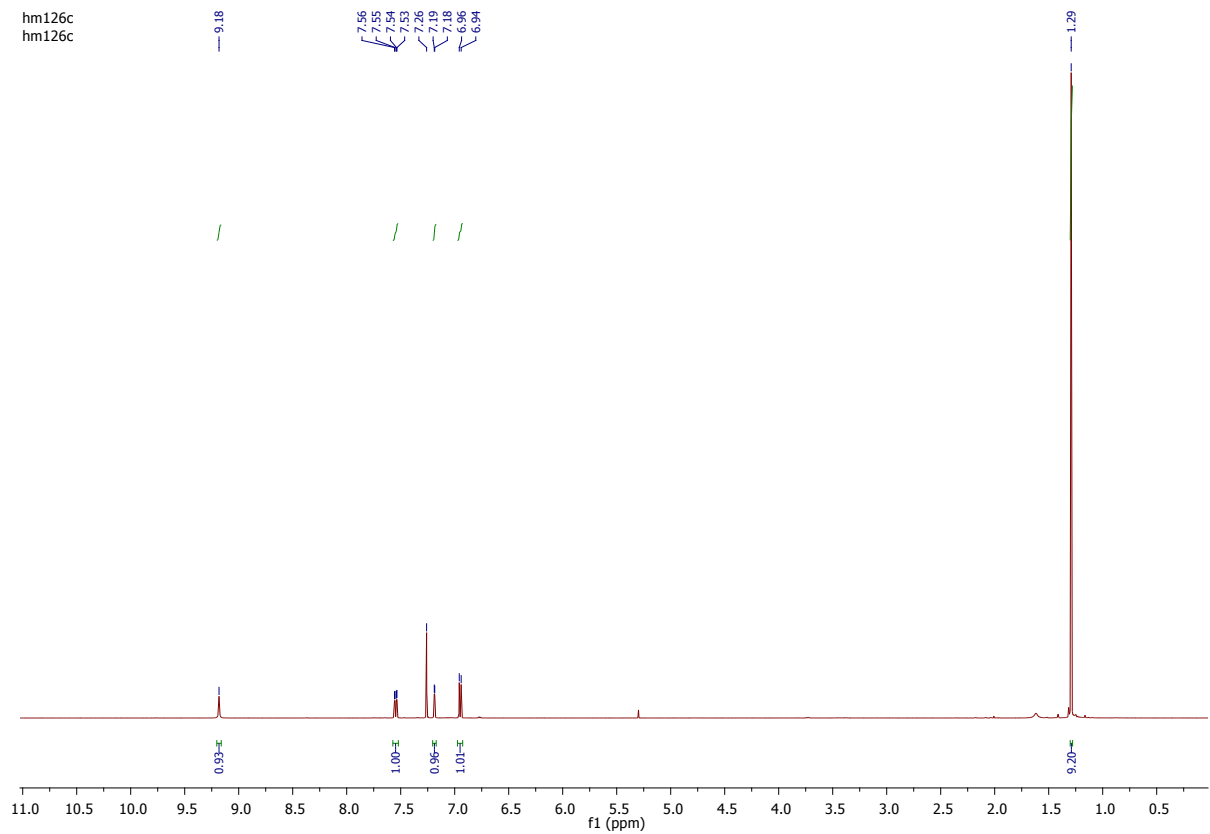

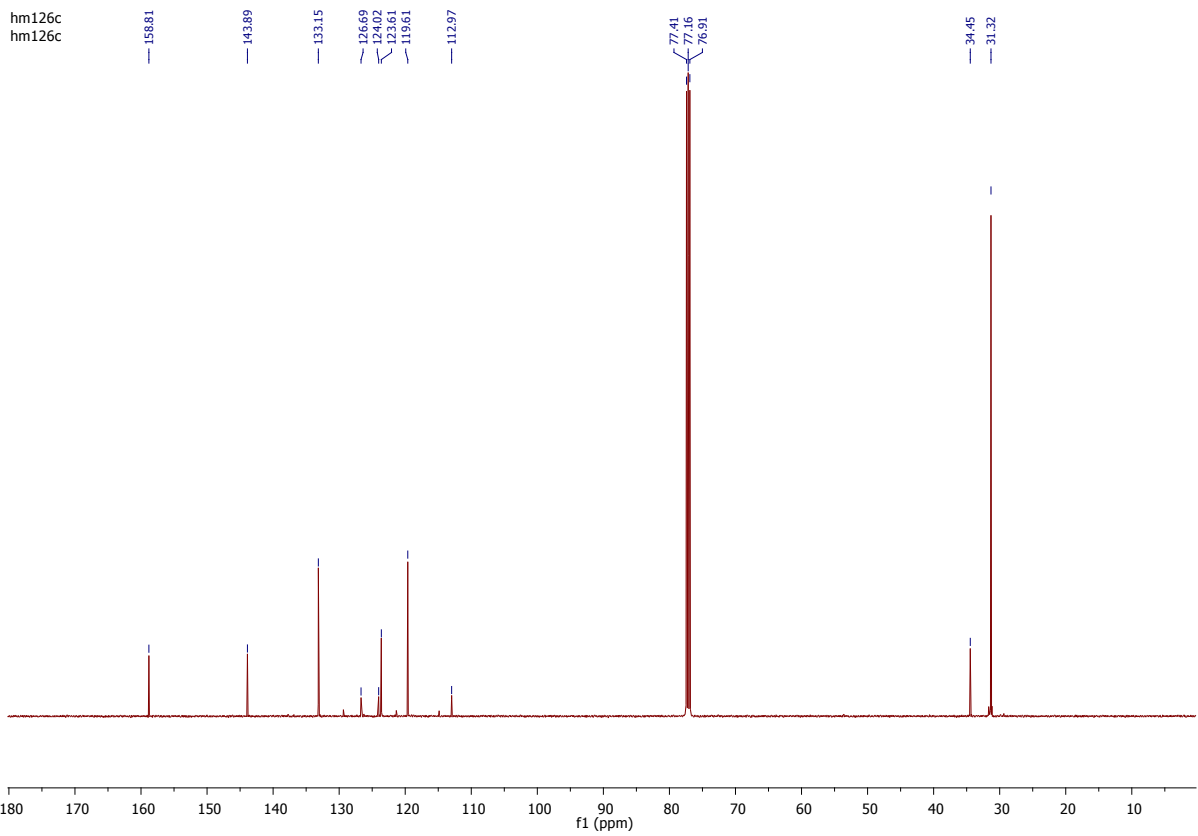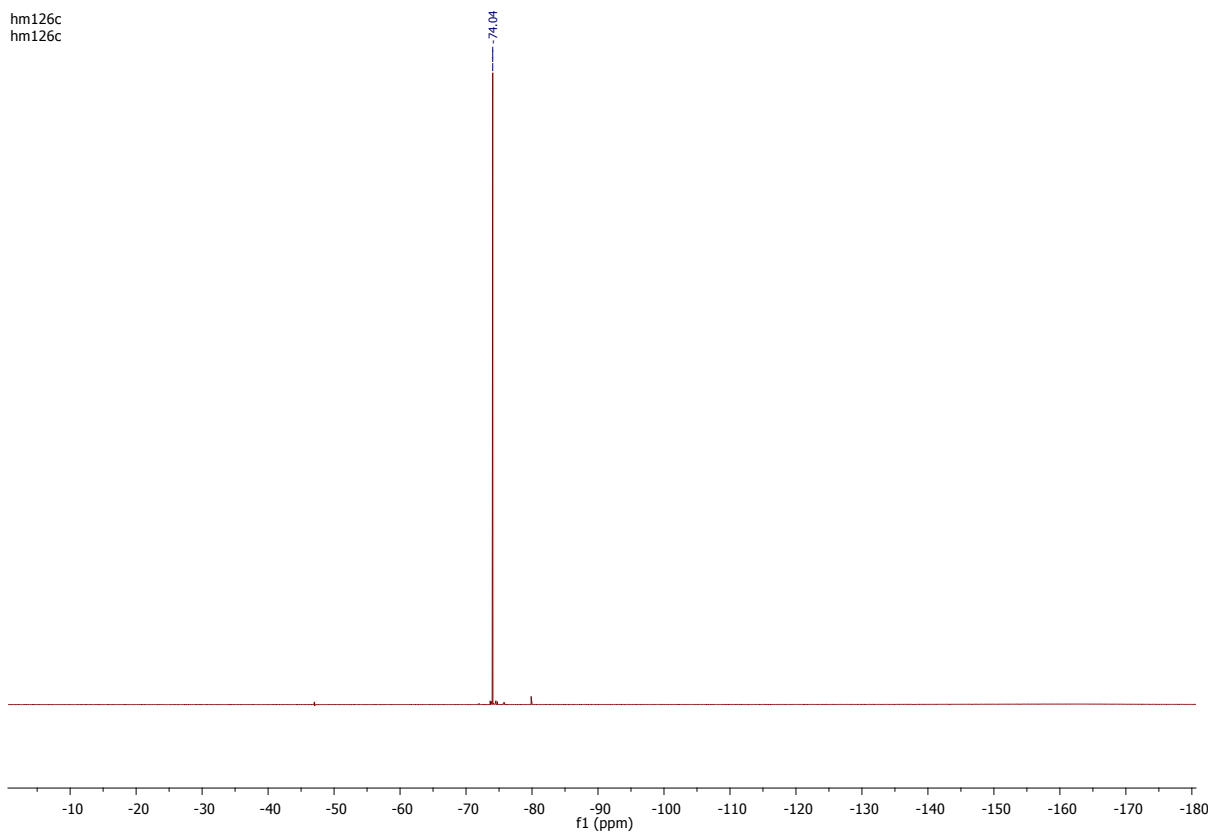

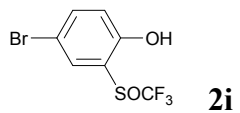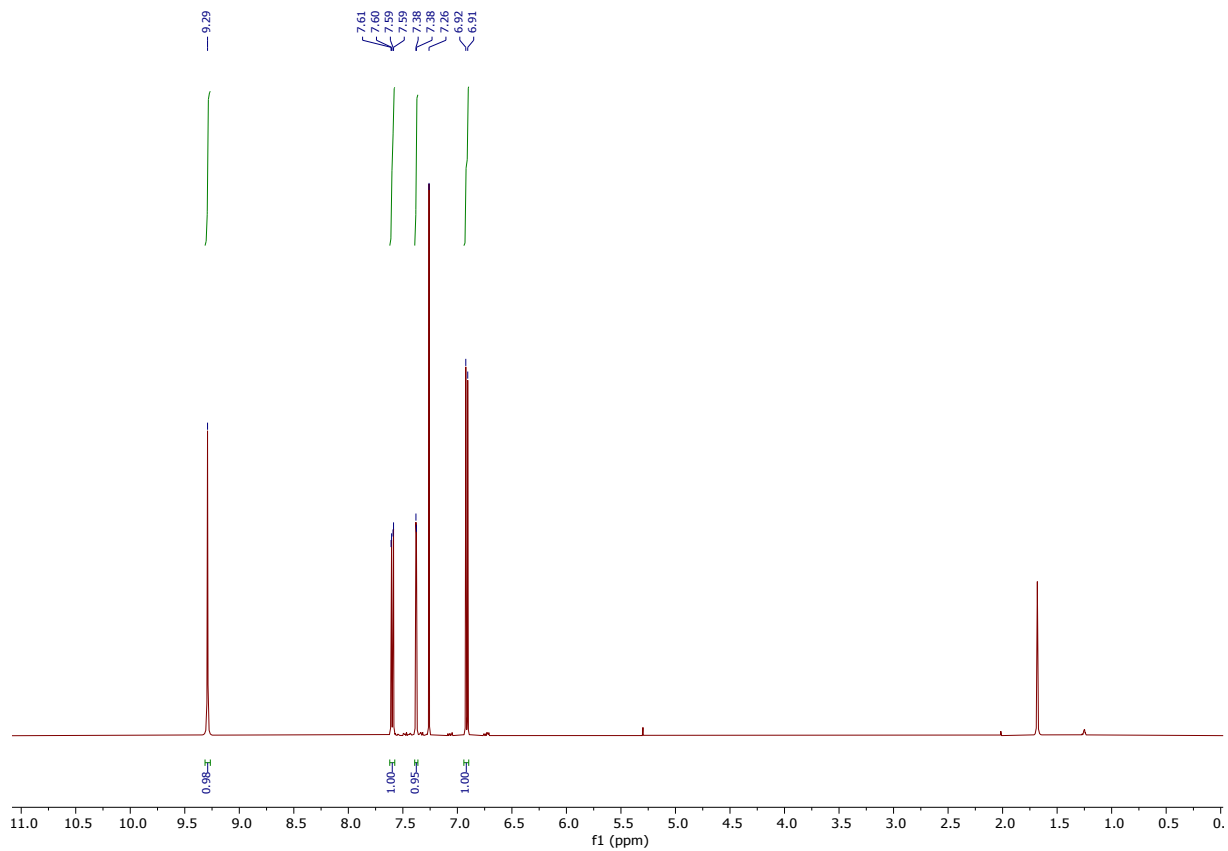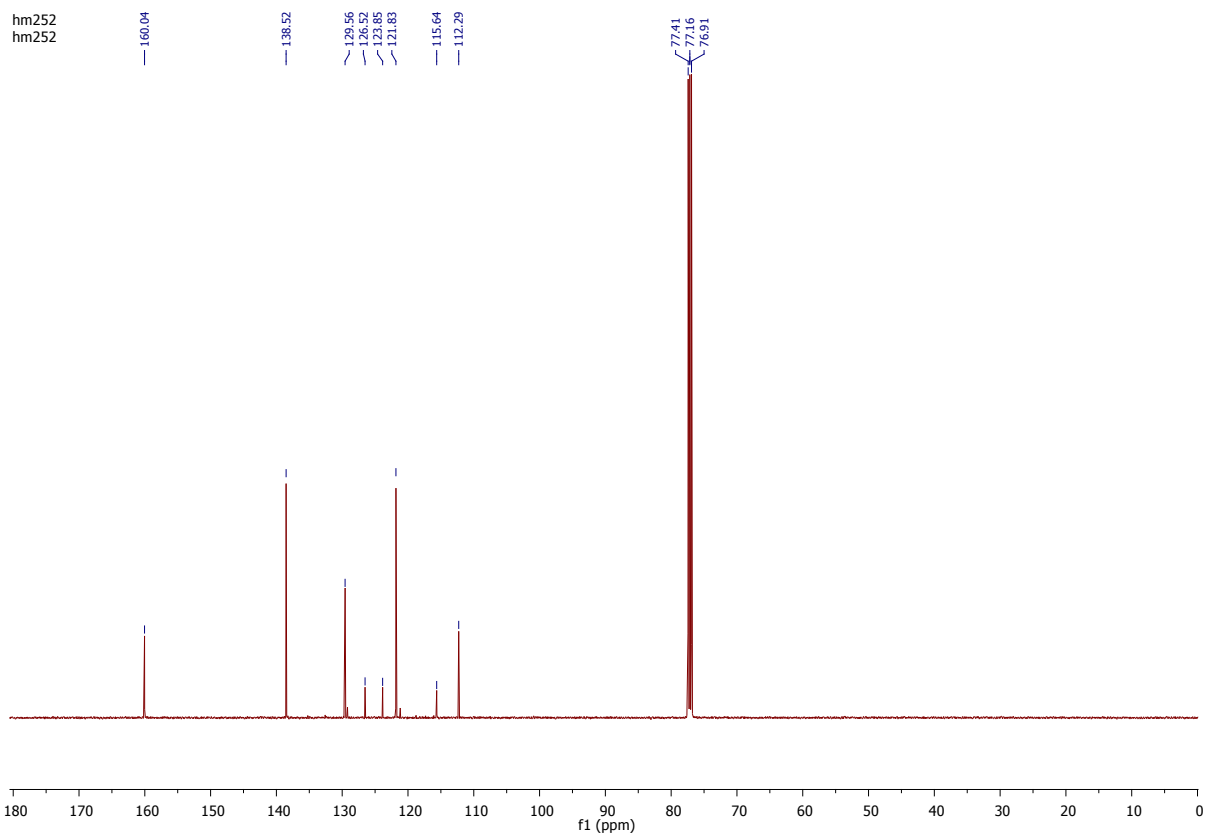

hm252  
hm252

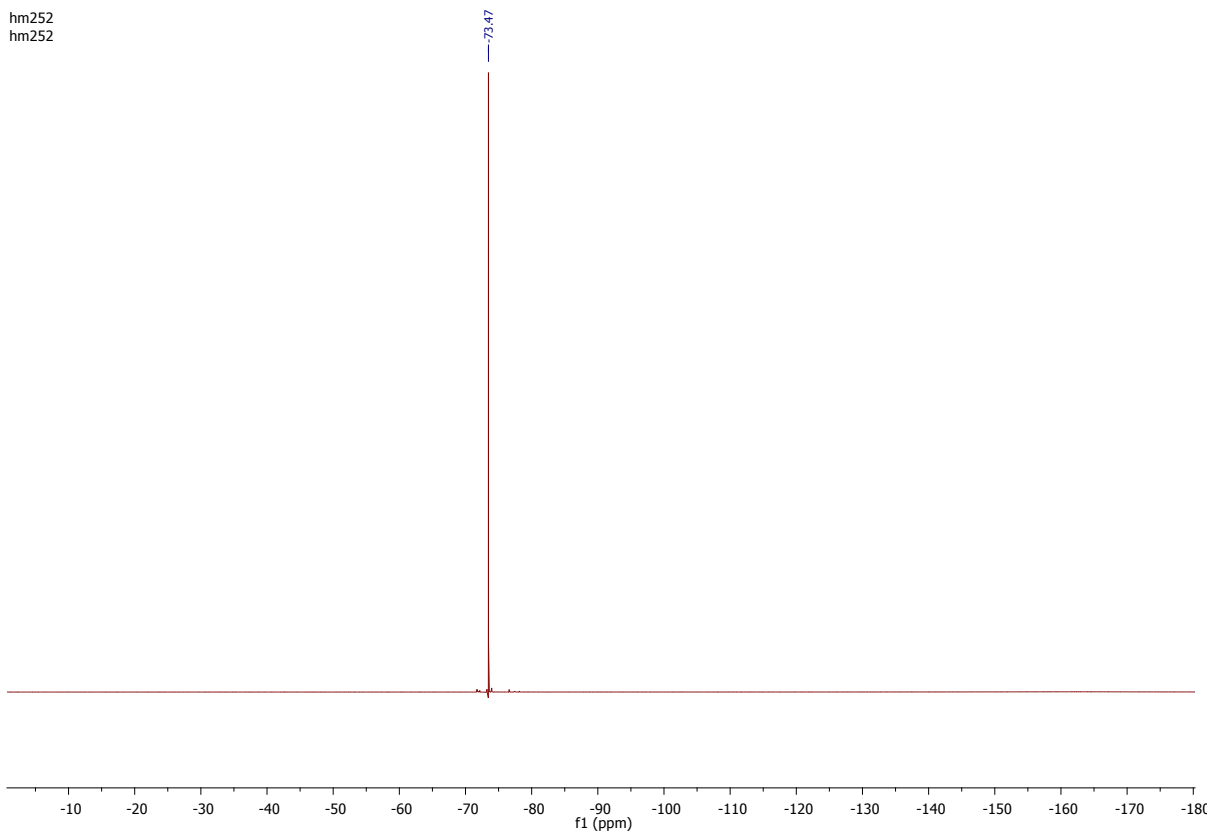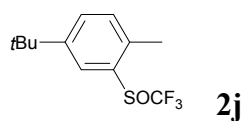

hm240  
hm240-kol

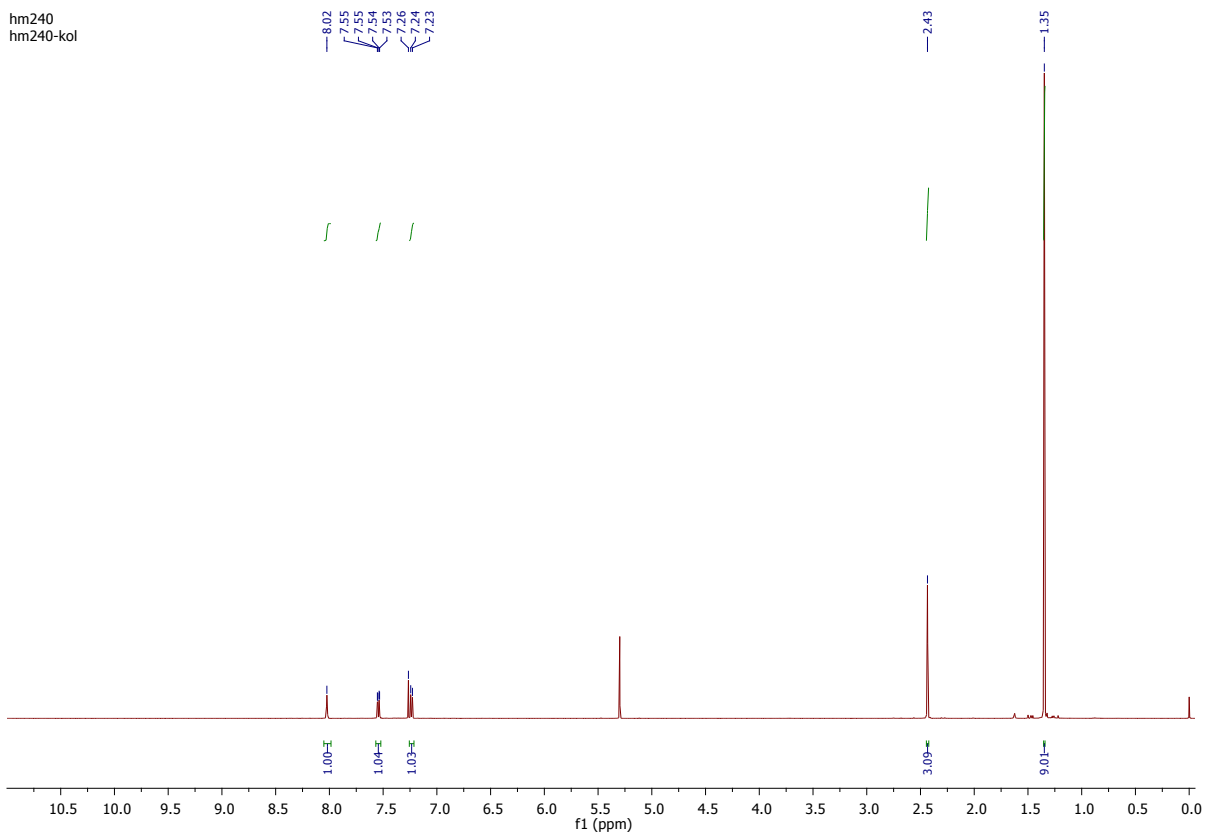

hm240  
hm240-kol

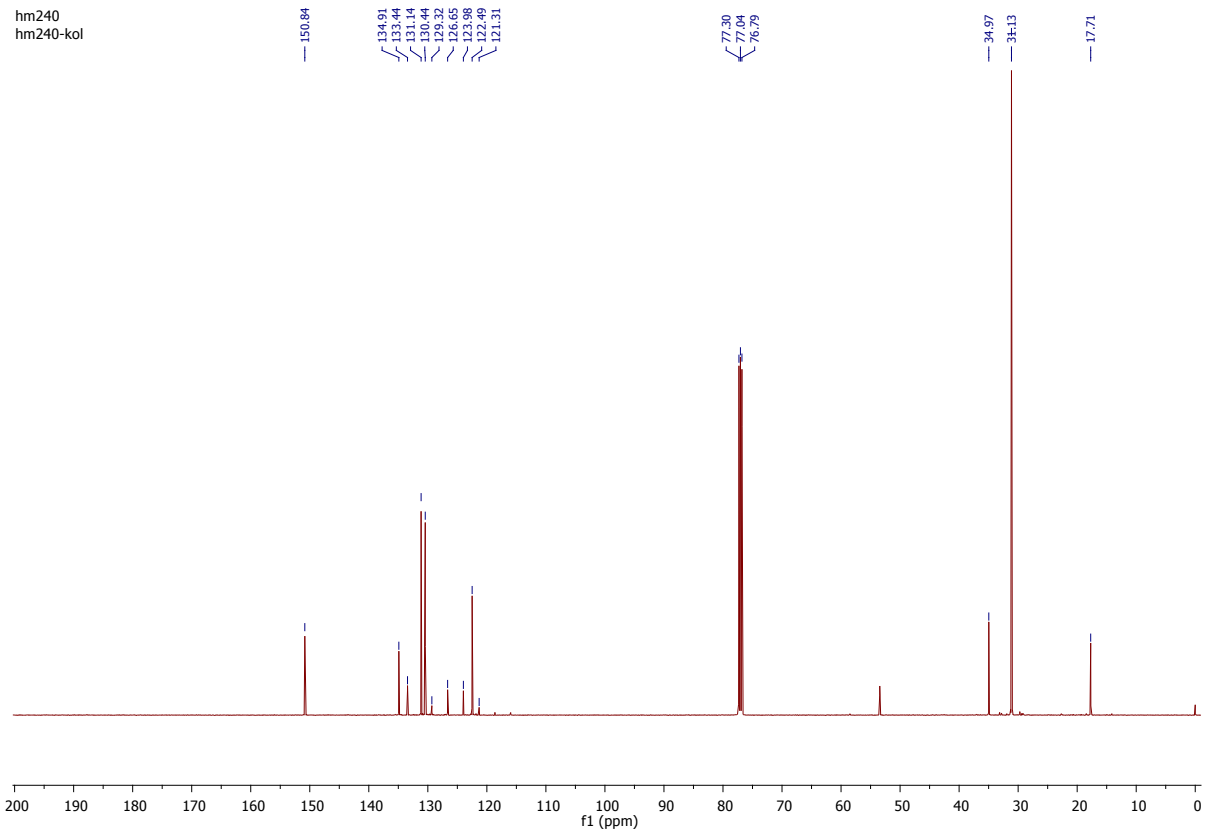

hm240  
hm240-kol

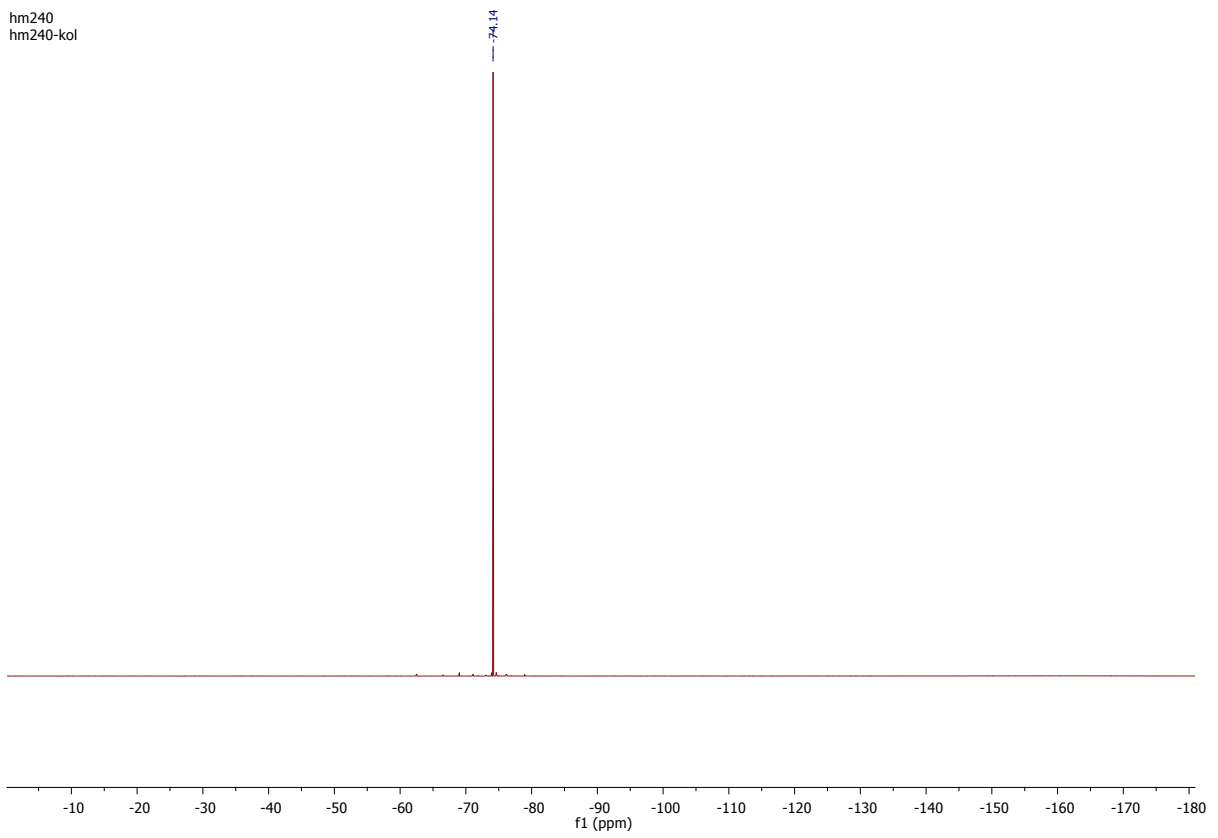

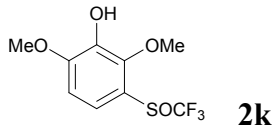

hm228  
hm228

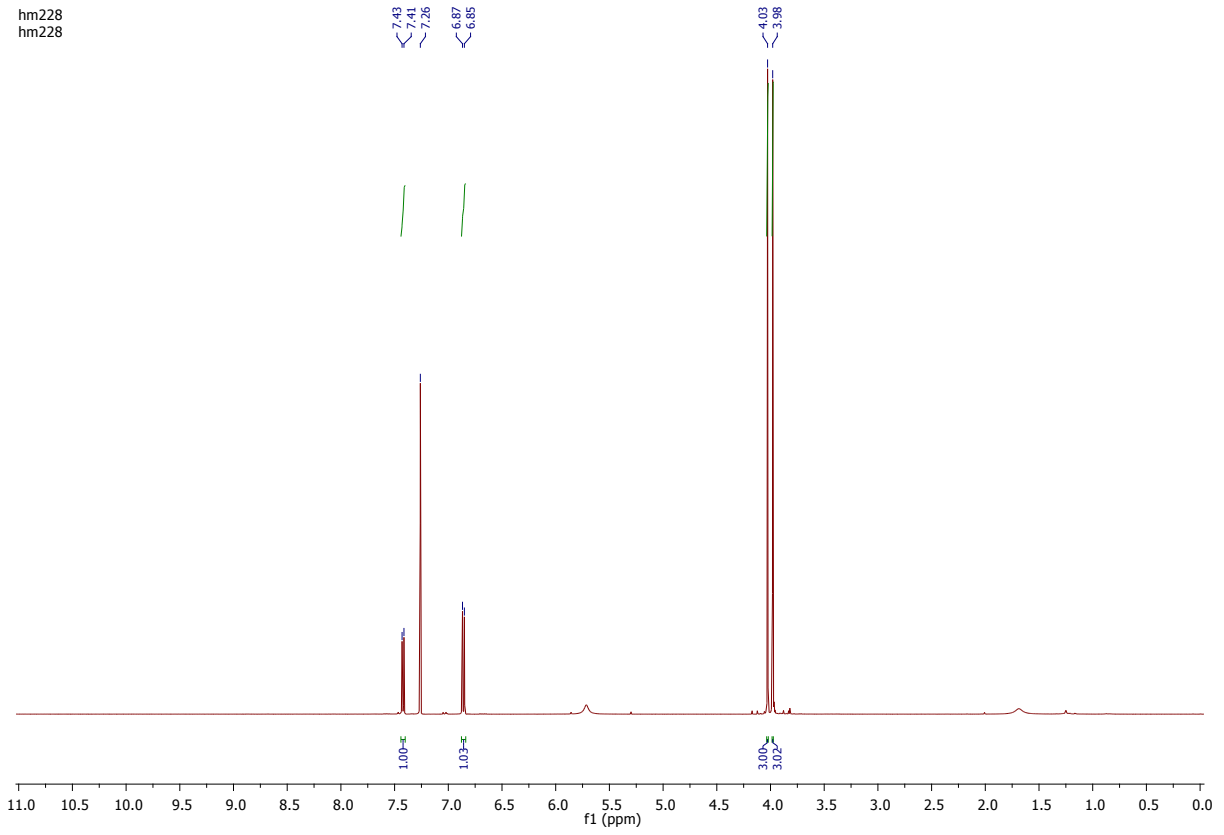

hm228  
hm228

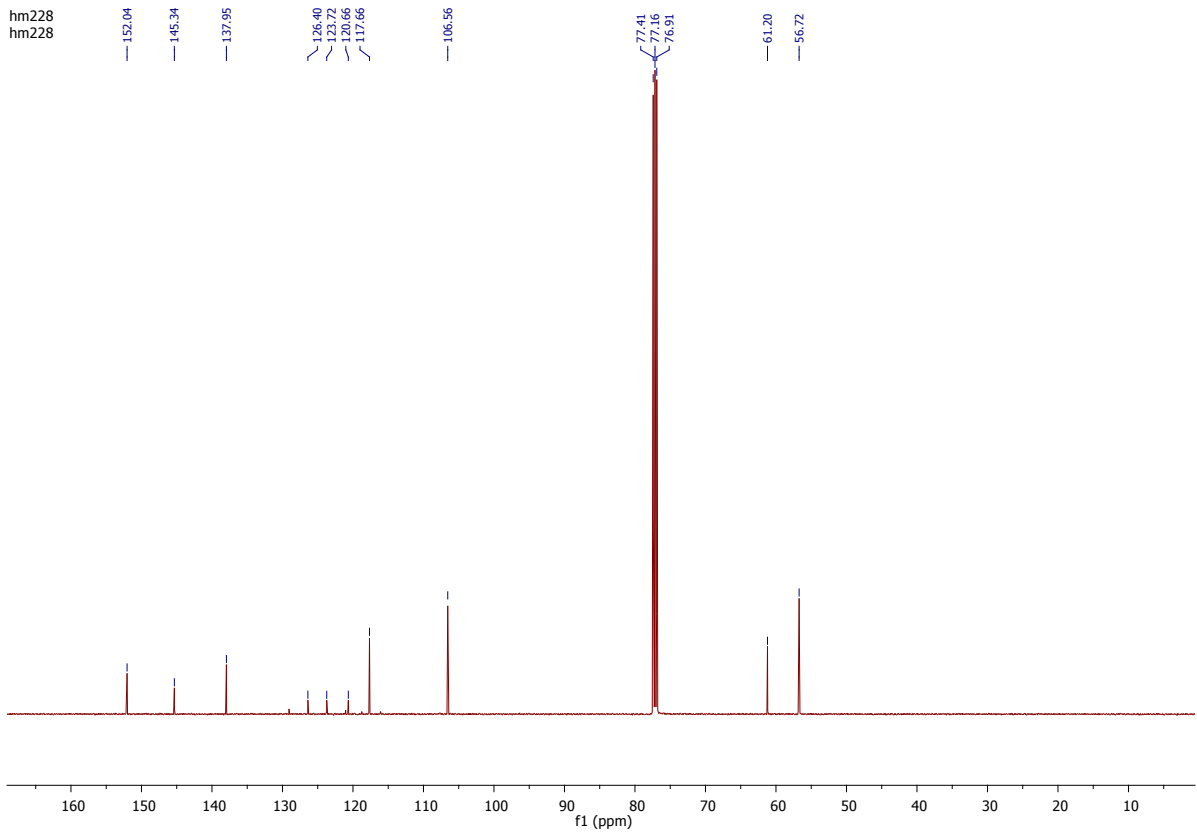

hm228  
hm228

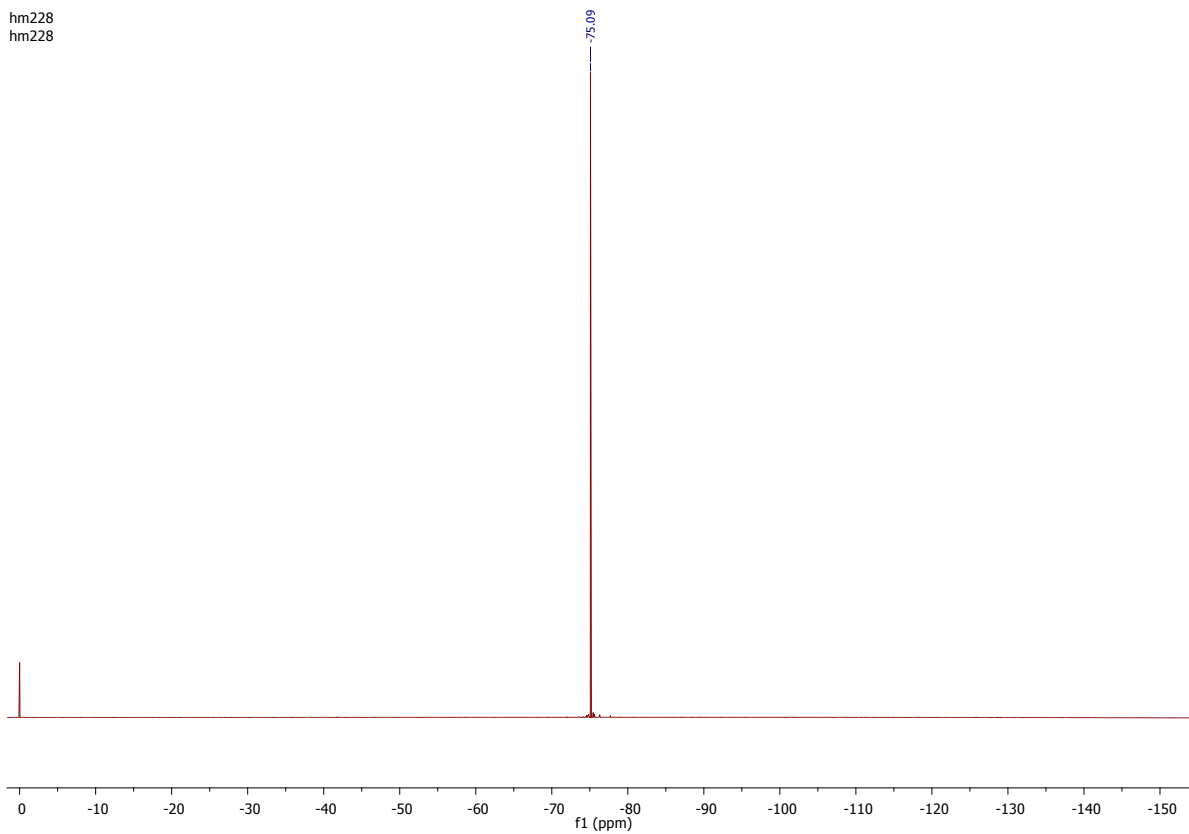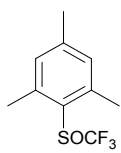

**21**

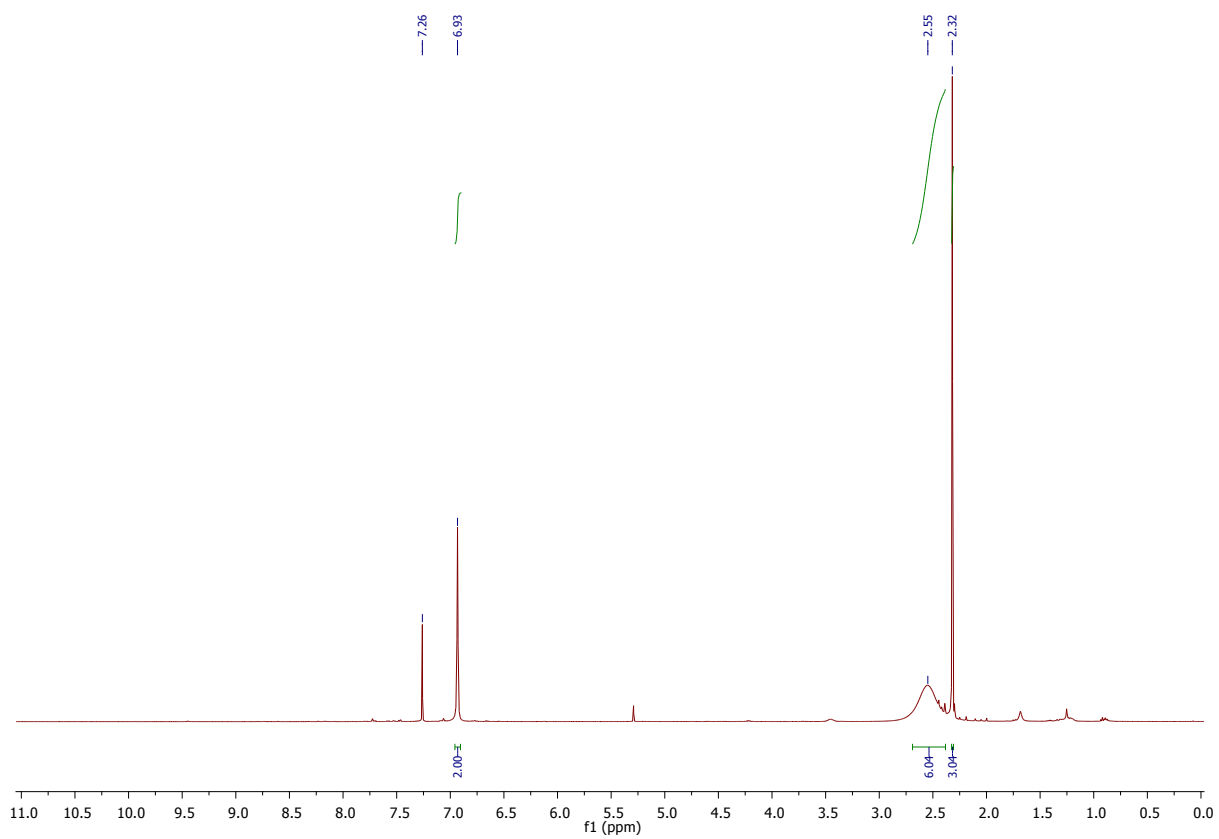

hm254  
hm254

143.77

130.67  
127.88  
126.63  
126.30  
122.61

77.41  
77.16  
76.91

21.30  
19.38

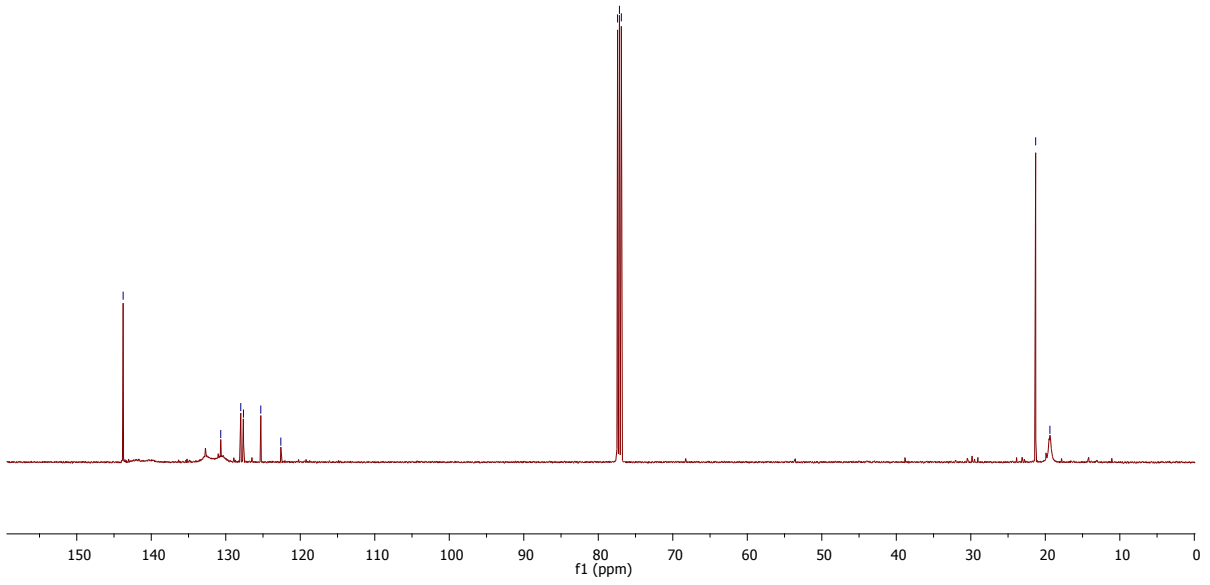

hm254  
hm254

70.48

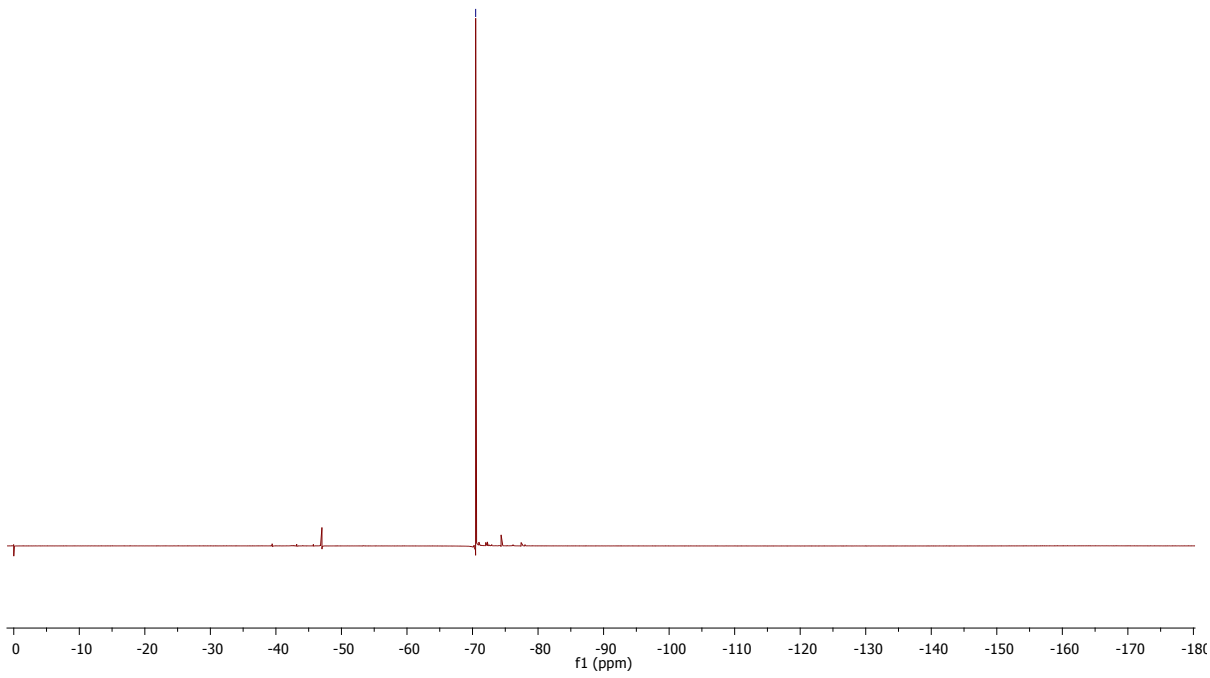



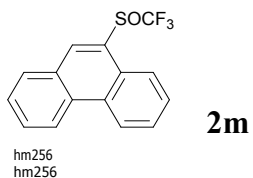

hm256  
hm256

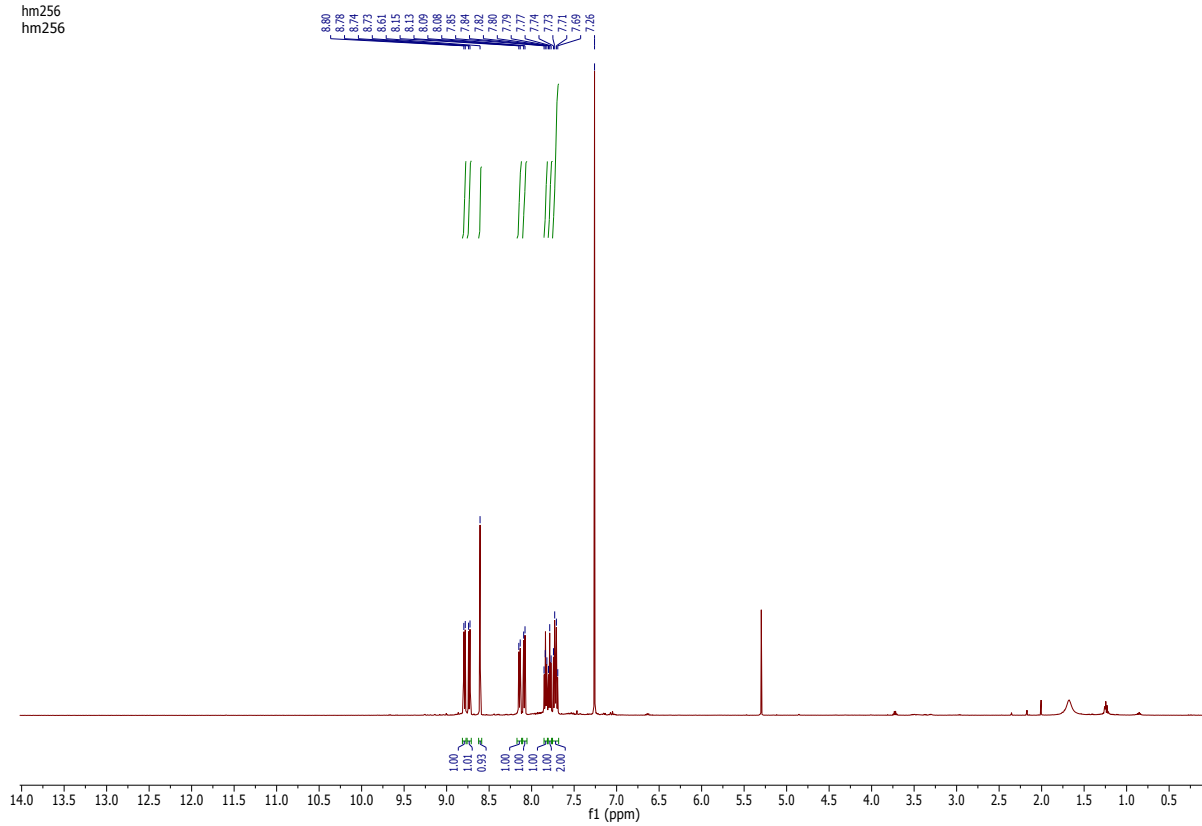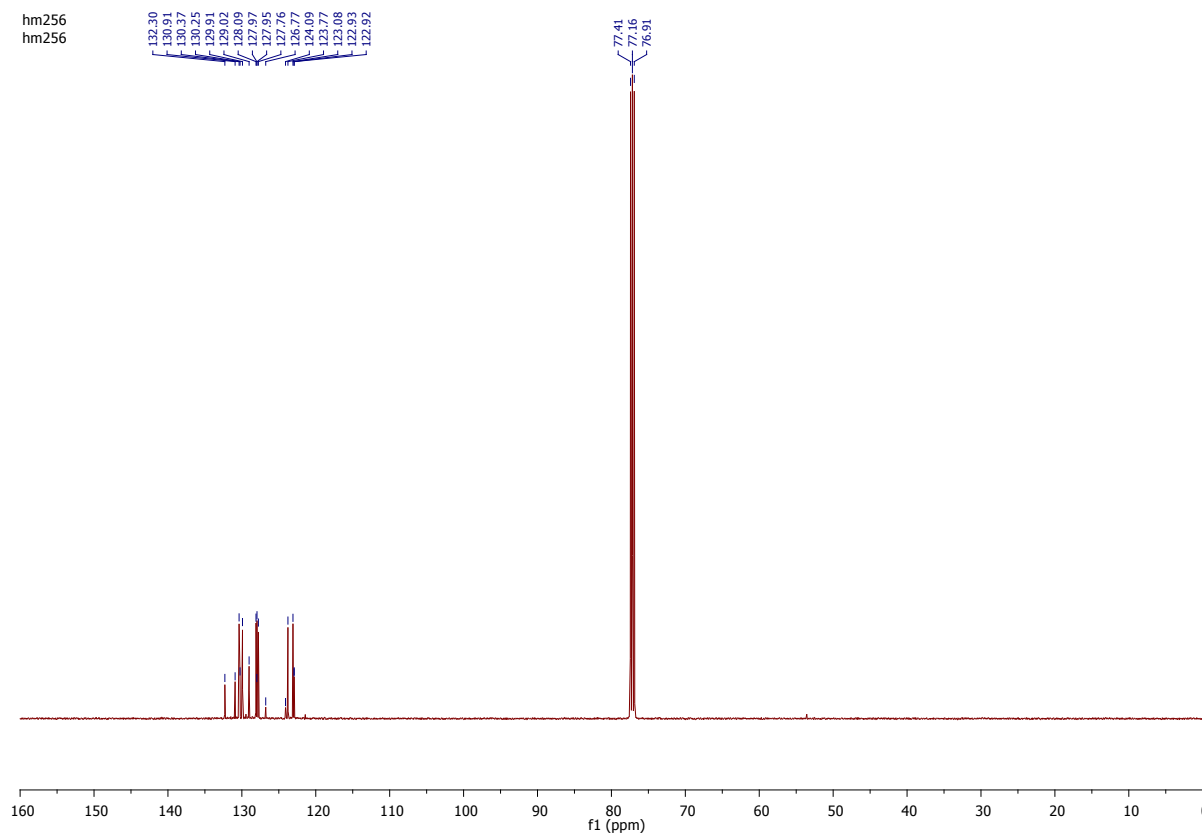

hm256  
hm256

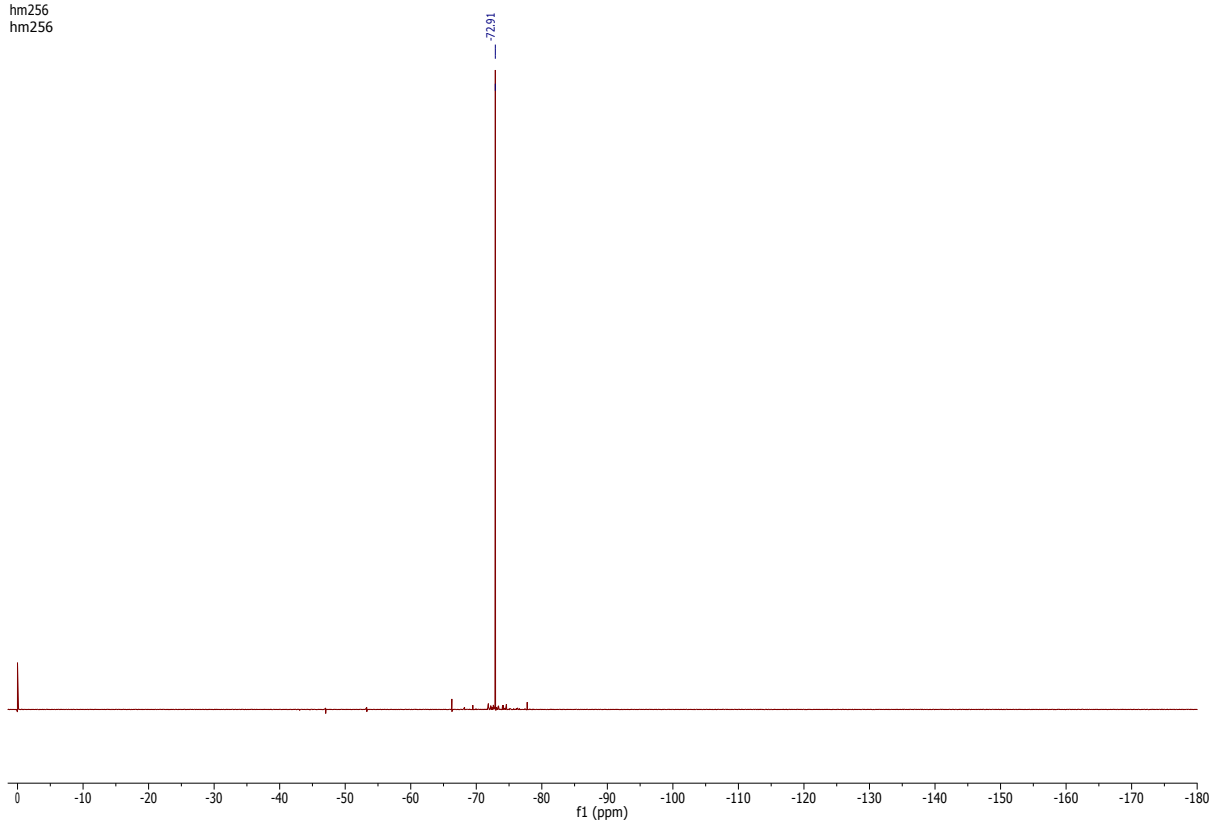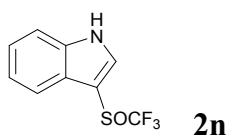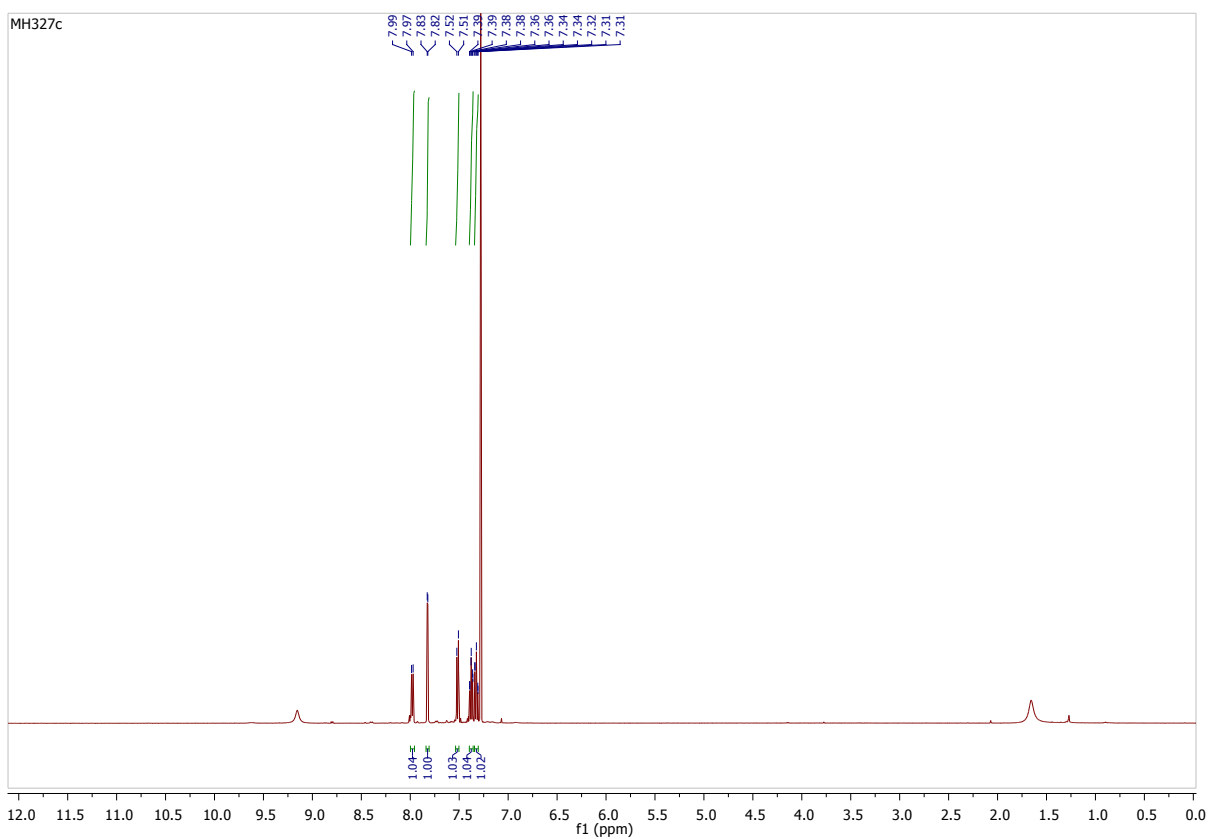

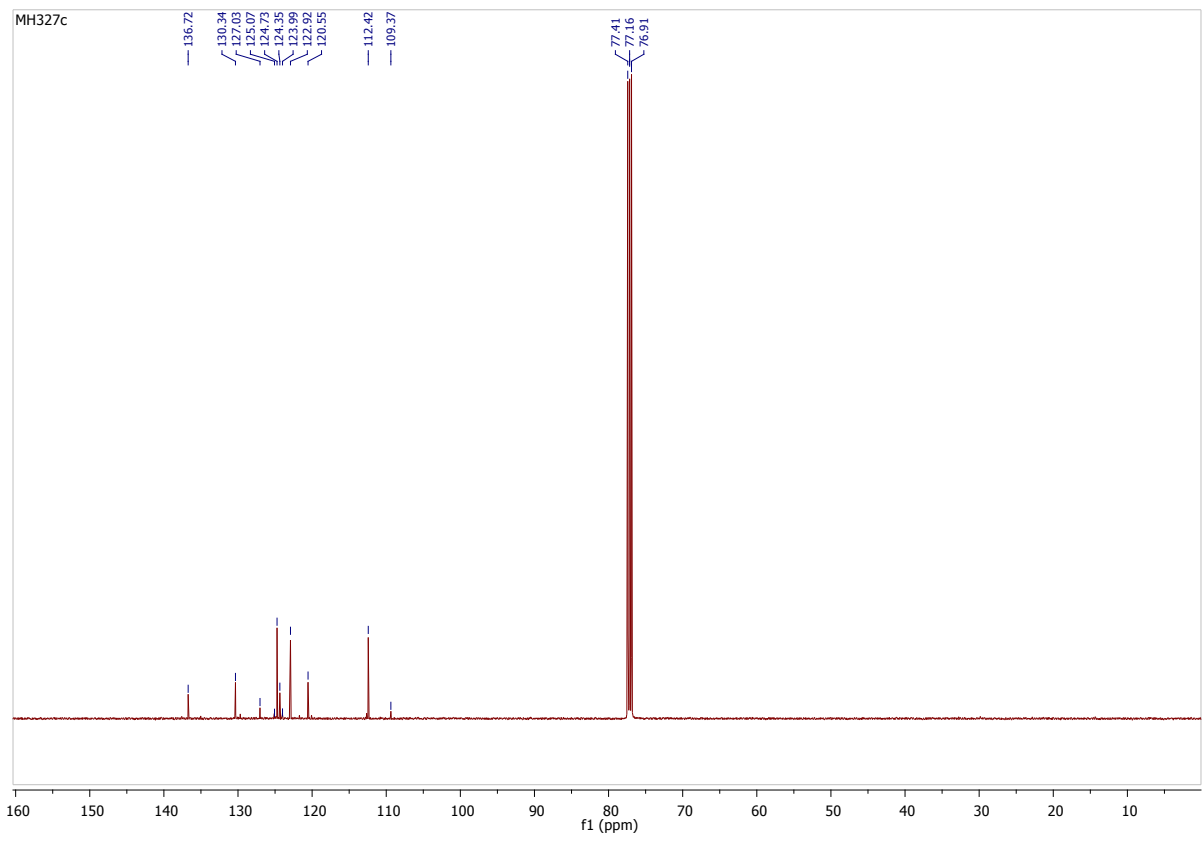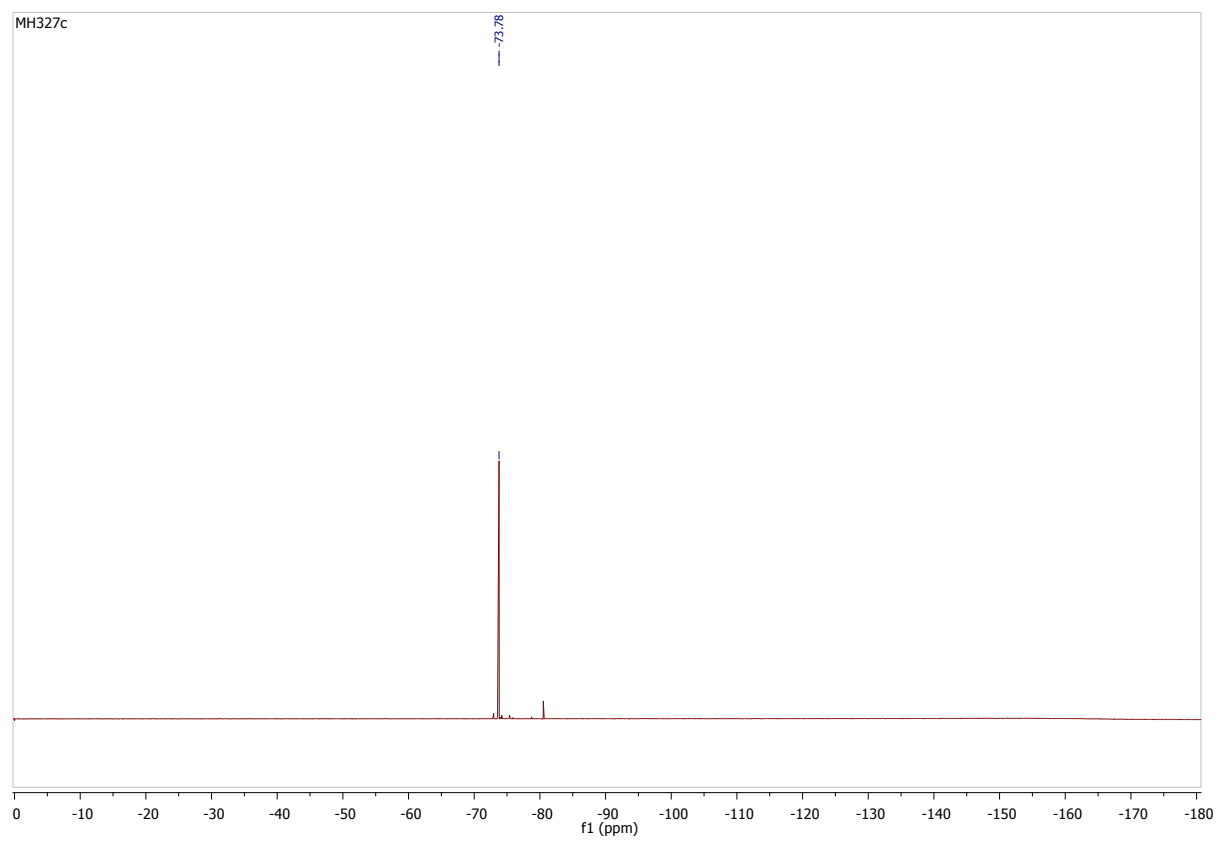

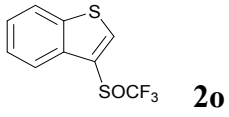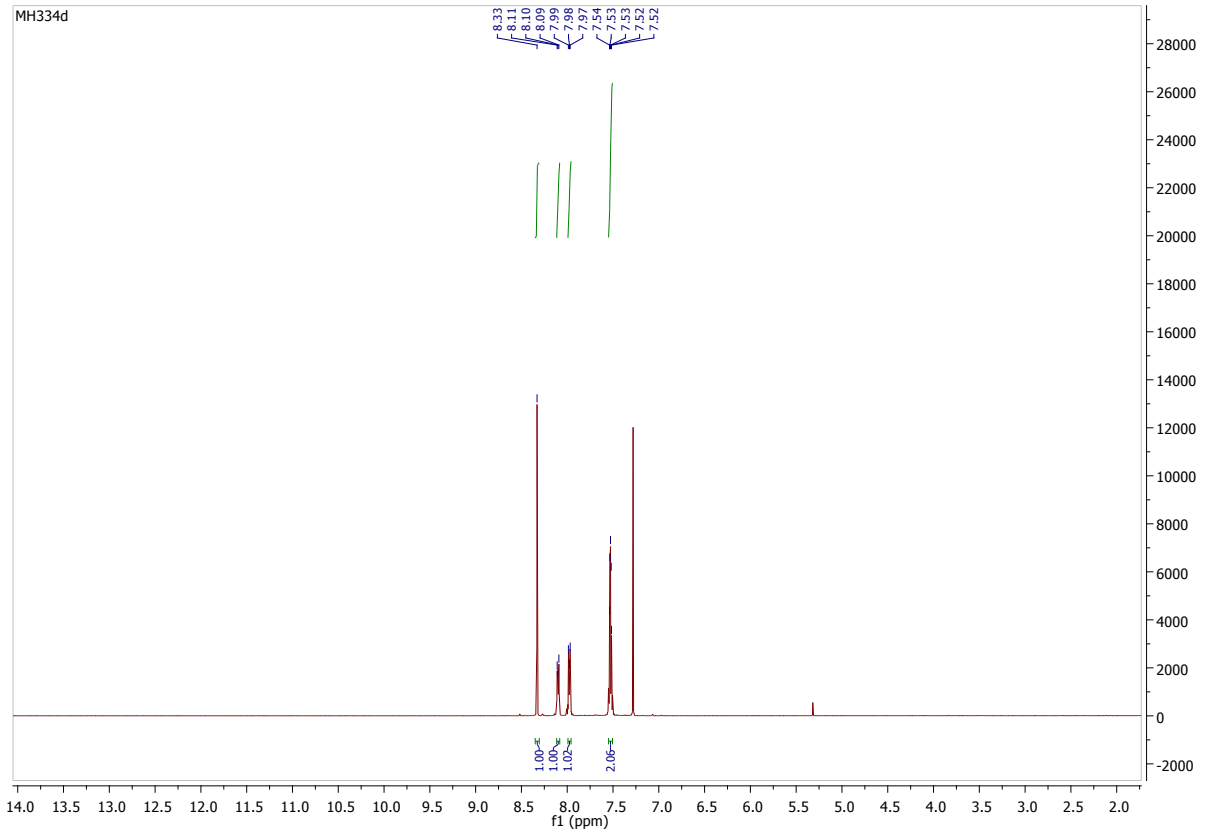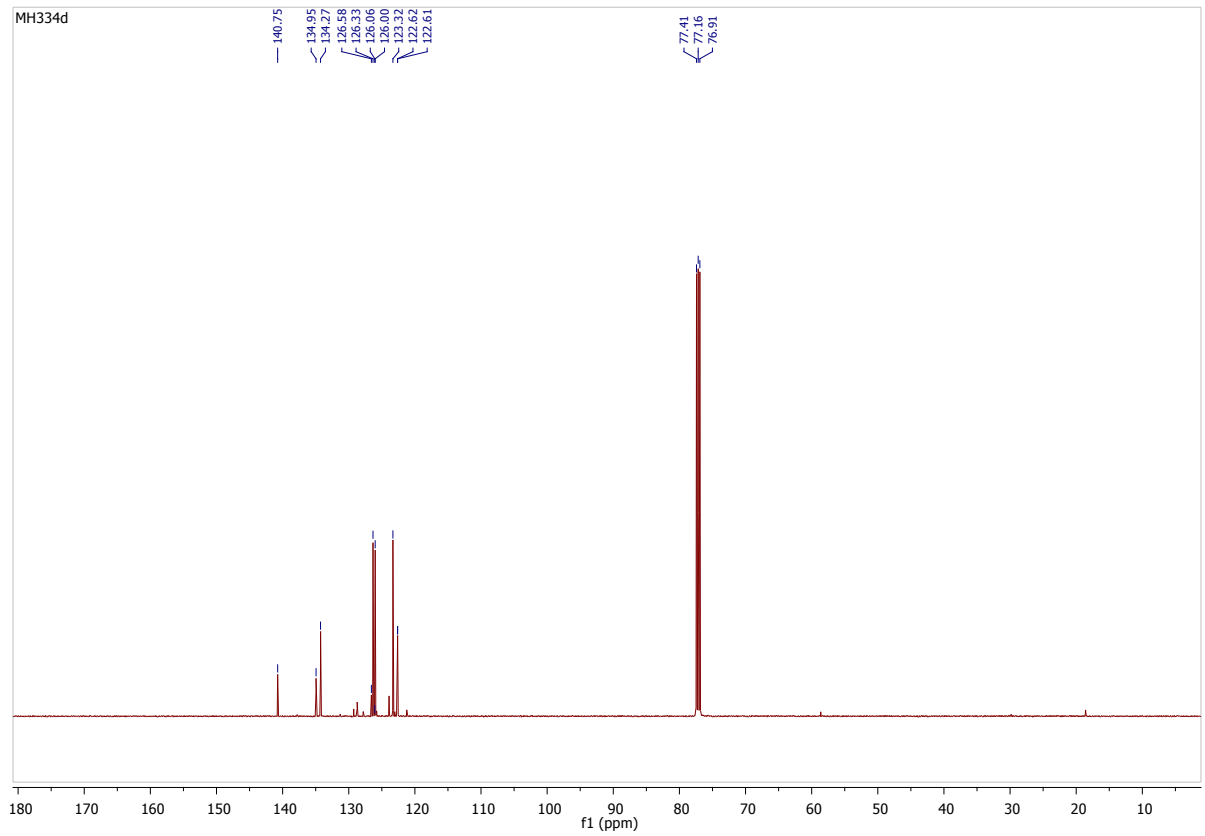

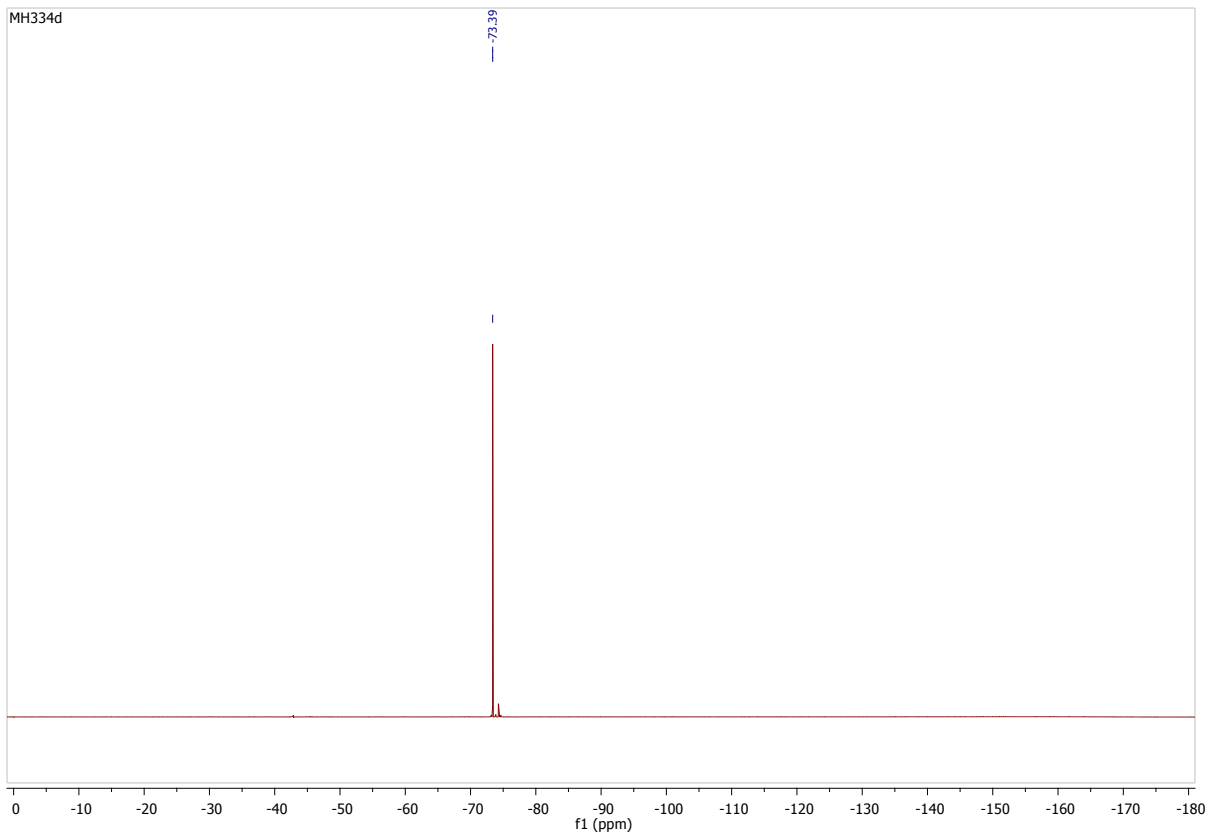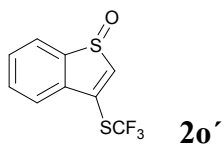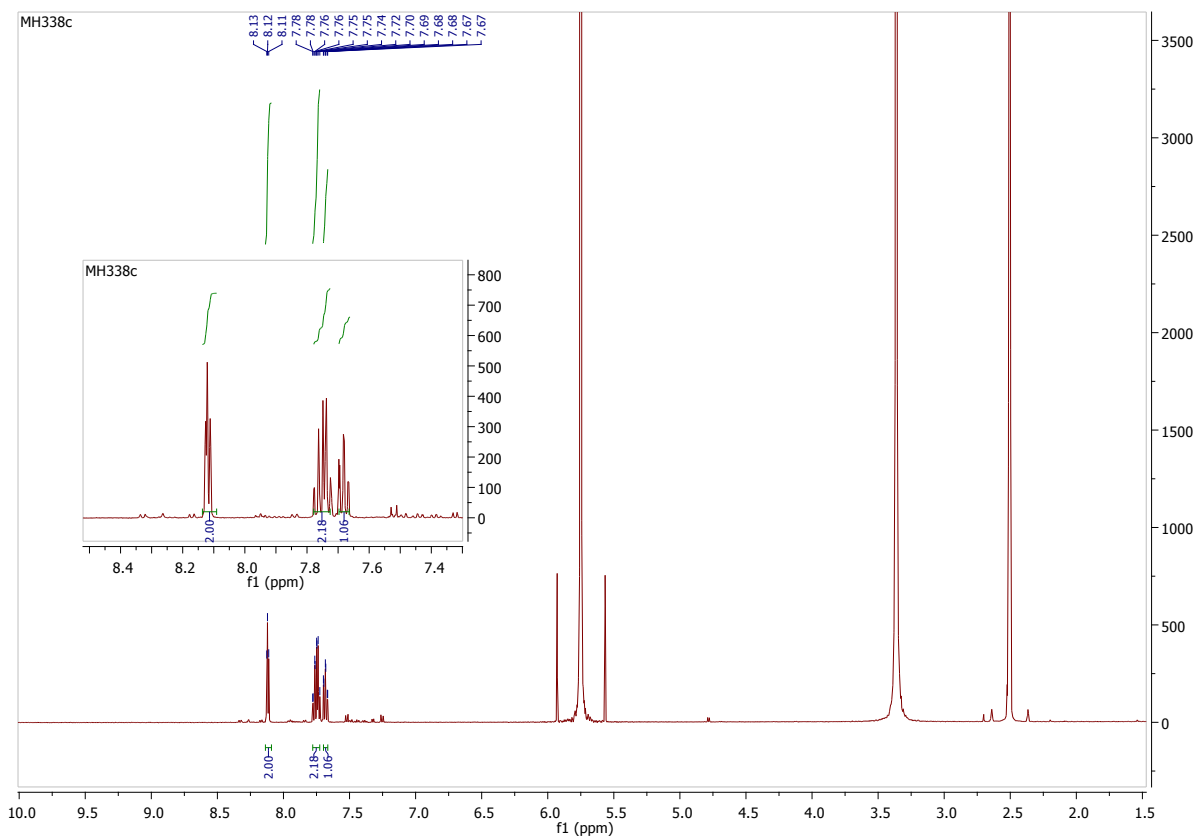

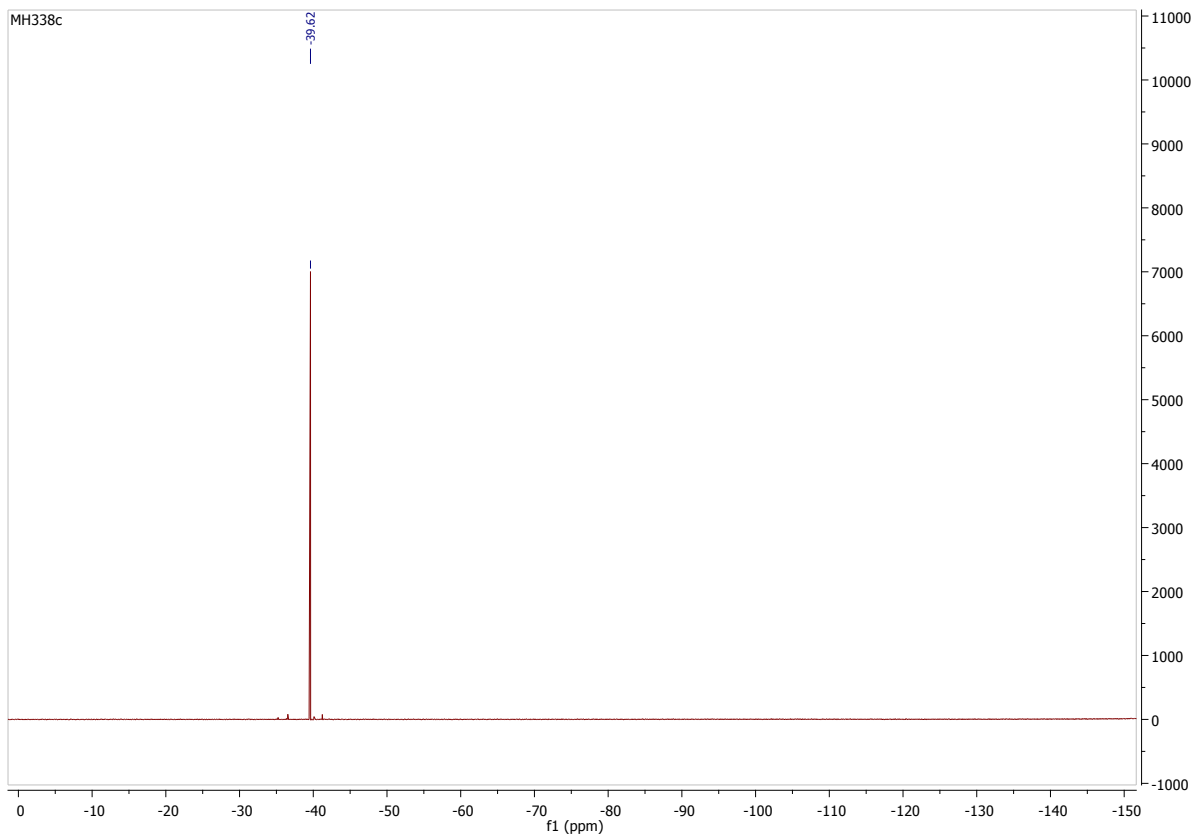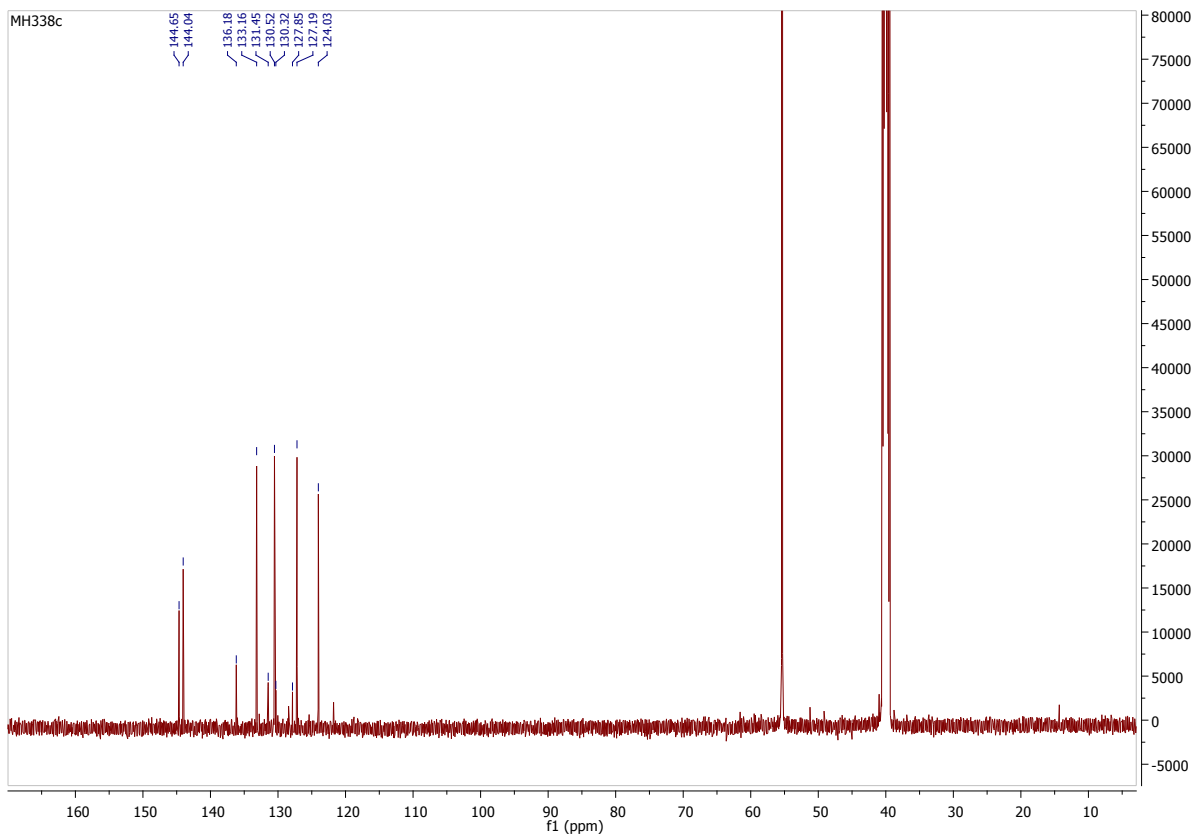

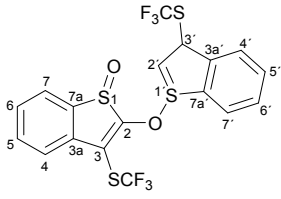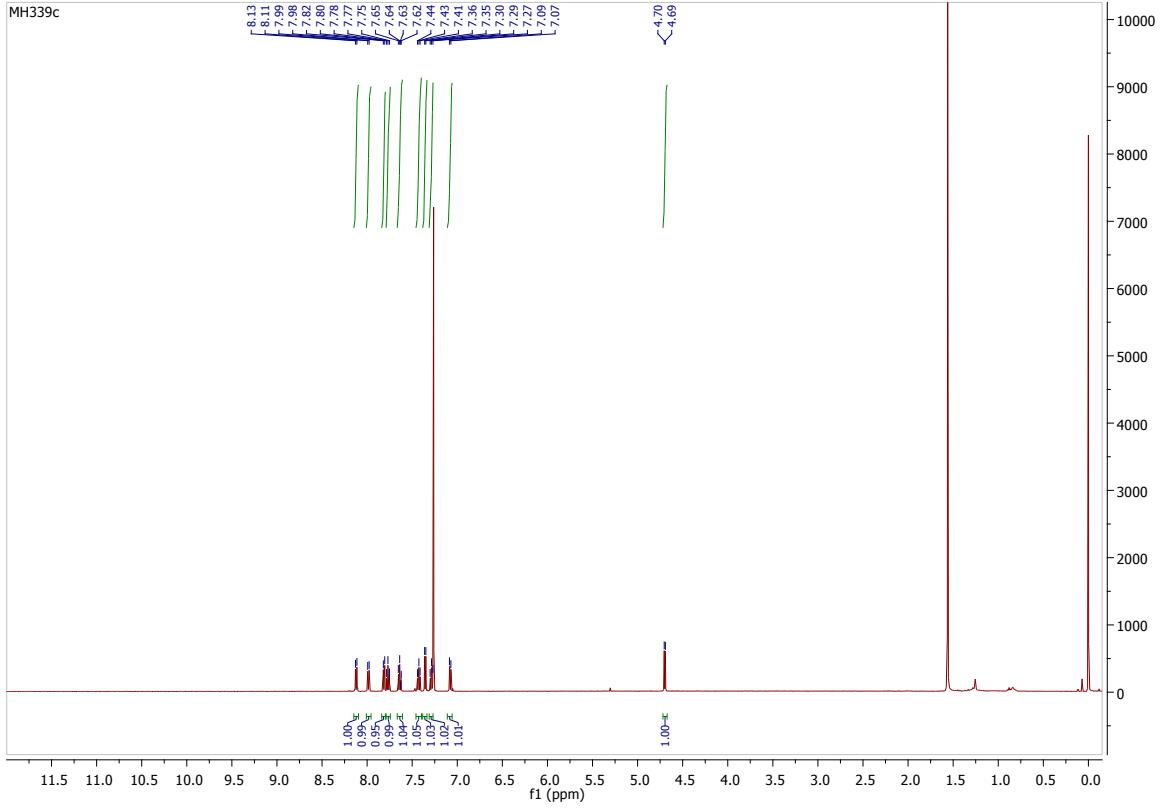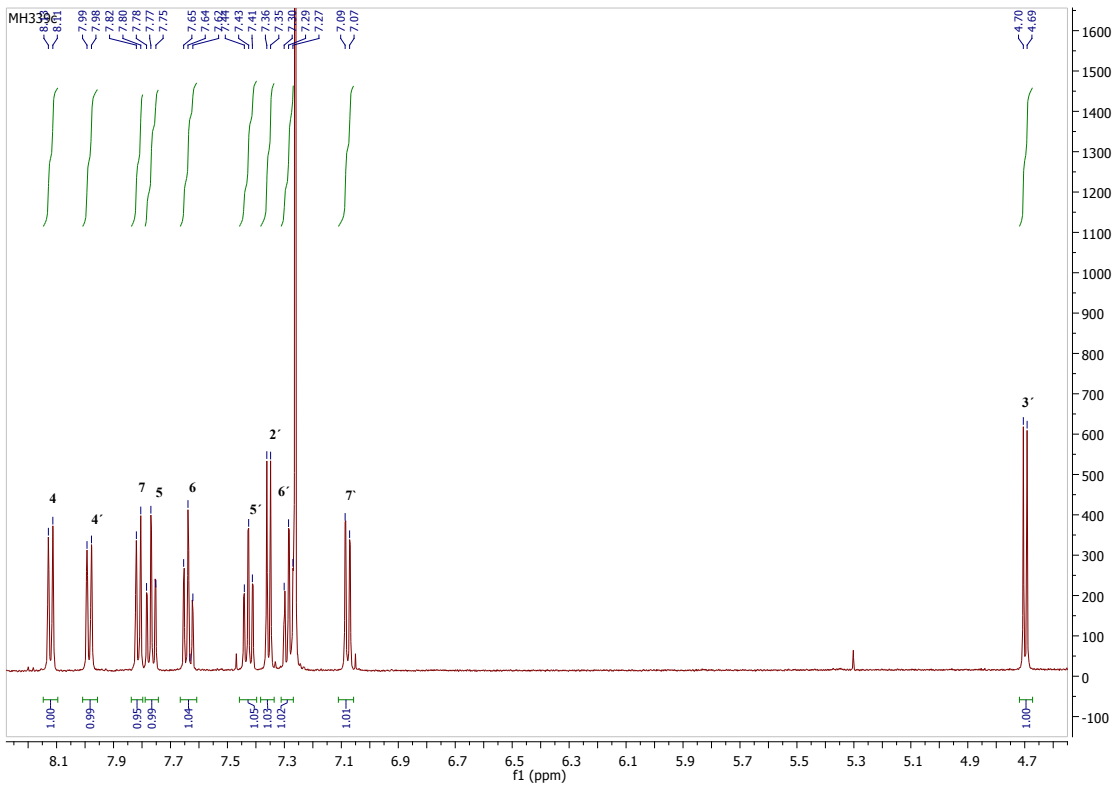

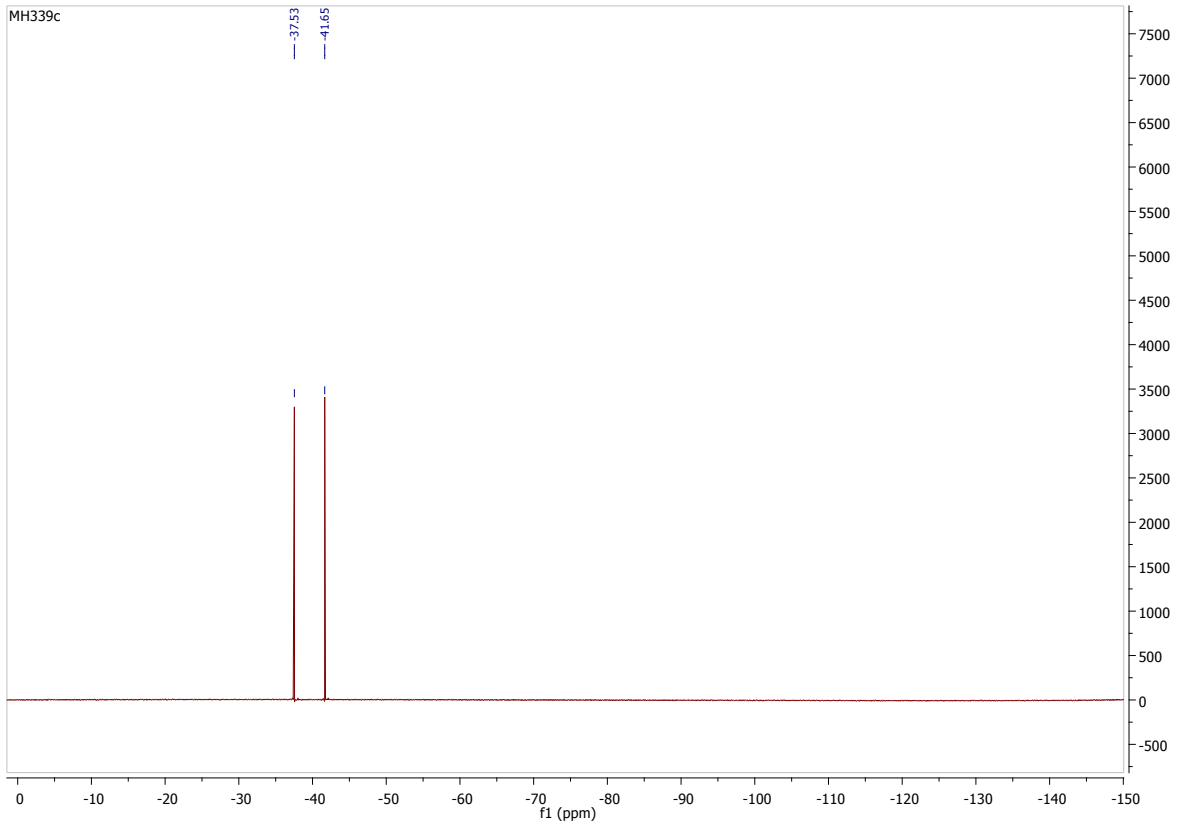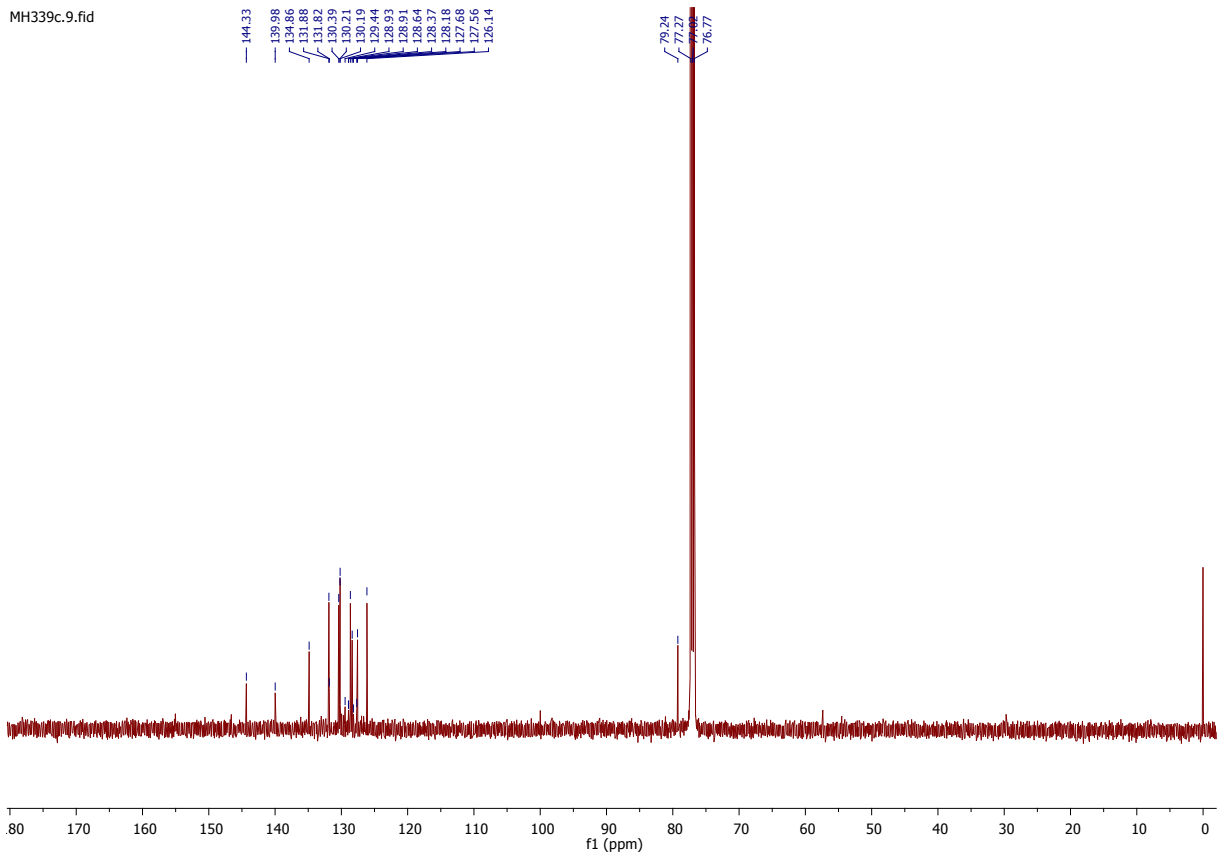



MH339c.9.fid

144.98

139.98

134.86  
131.88  
131.82  
130.21  
130.21  
130.19  
129.44  
128.93  
128.91  
128.64  
128.64  
128.16  
127.68  
127.56  
126.14

79.24

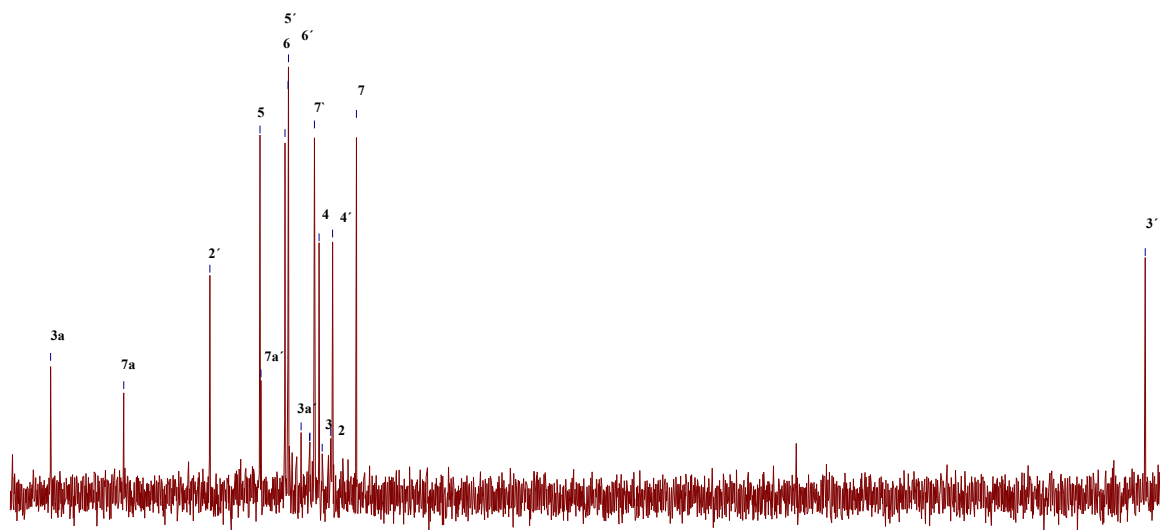

146 142 138 134 130 126 122 118 114 110 106 102 98 96 94 92 90 88 86 84 82 80  
f1 (ppm)

MH339c.7.ser

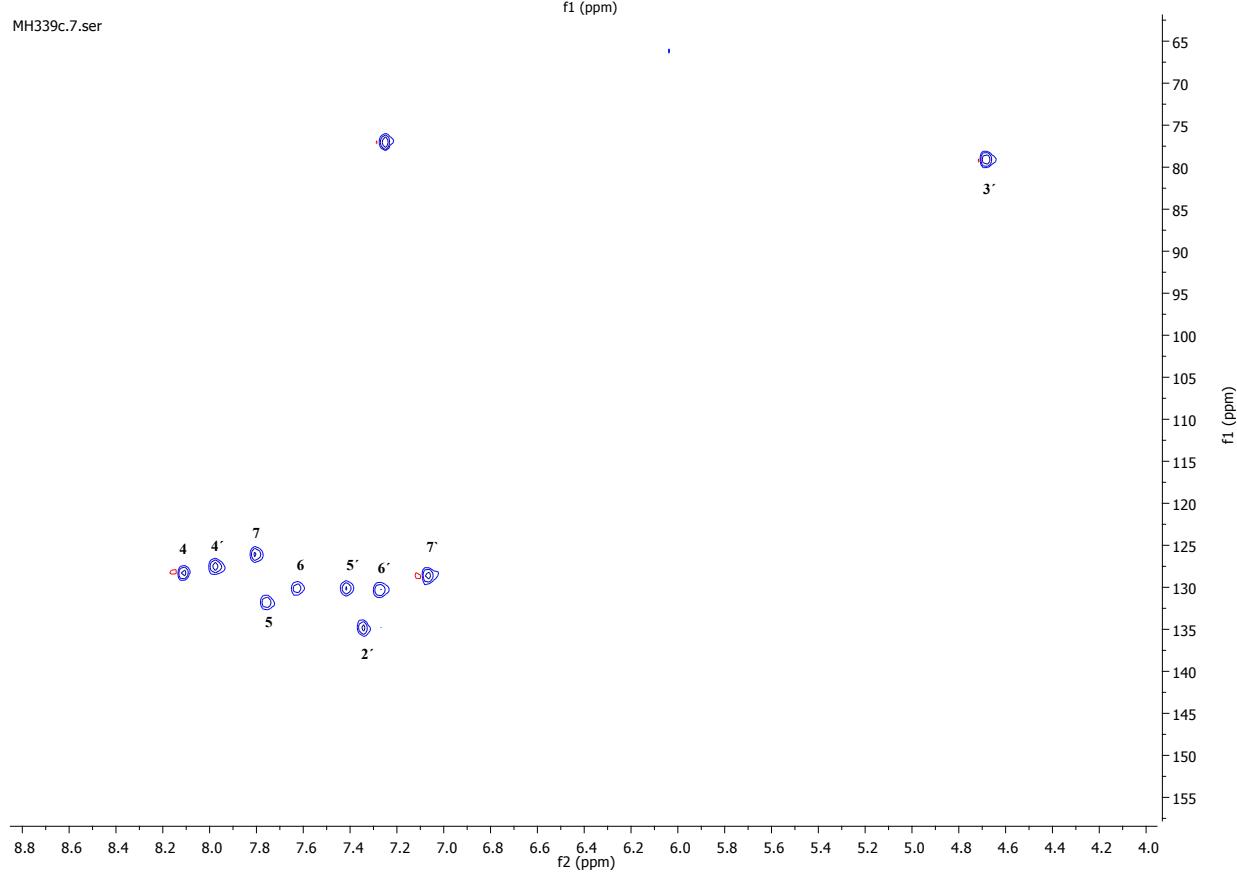

MH339c.4.ser

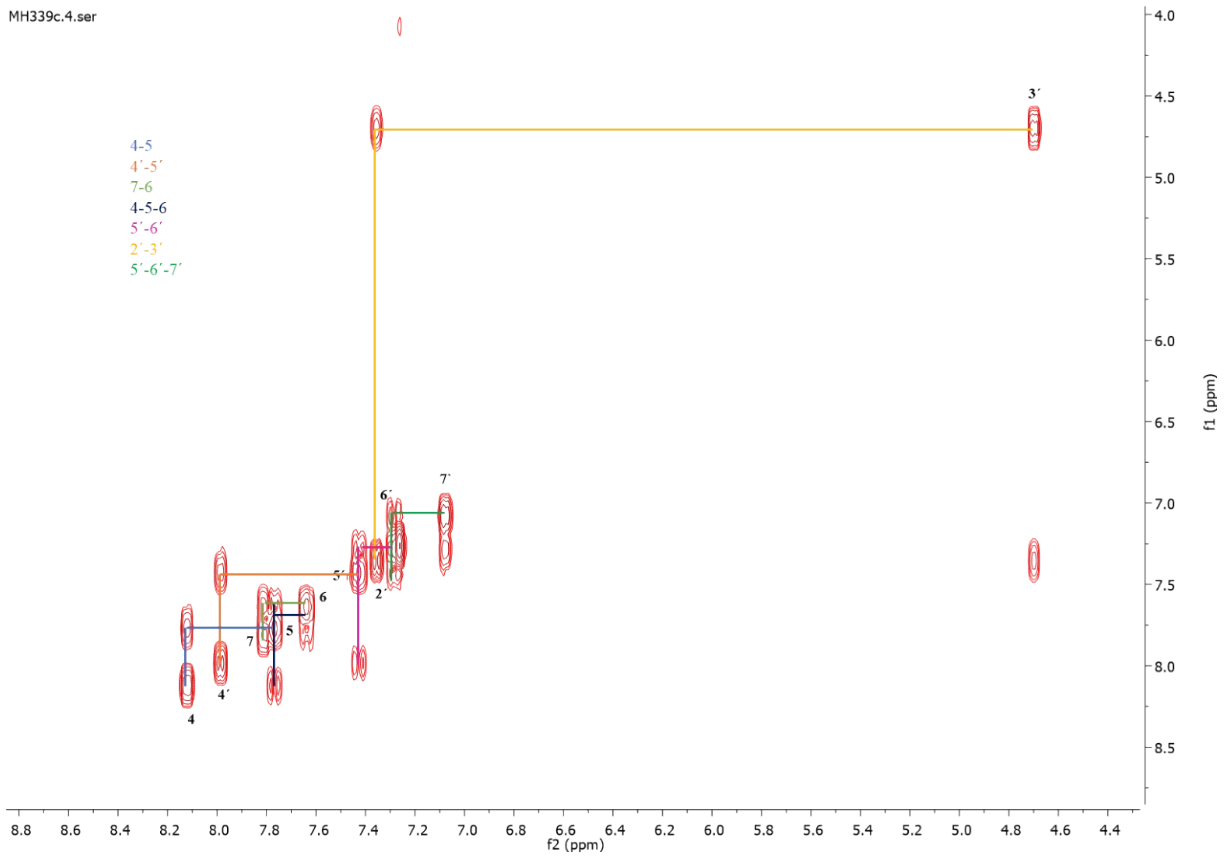

MH339c.11.ser

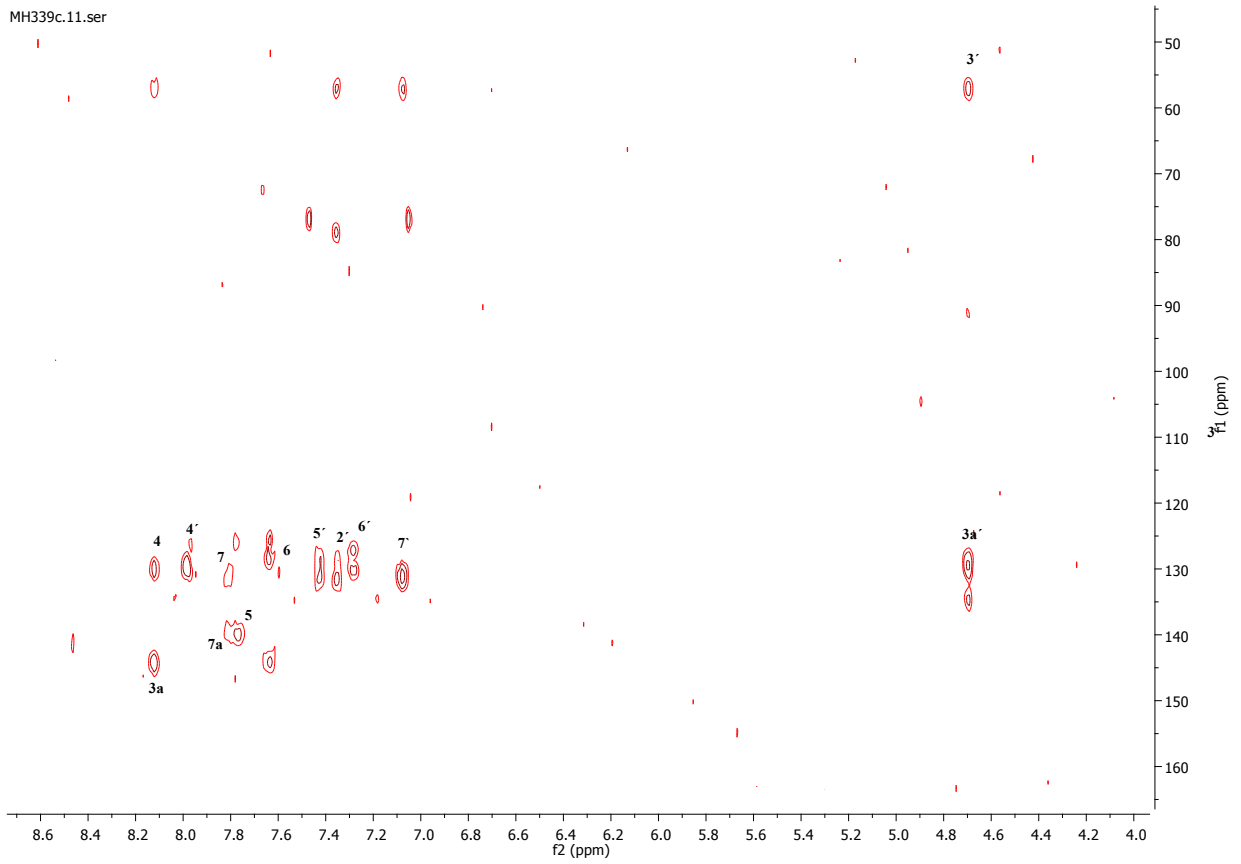

## References

- [1] R.-Y. Tang, P. Zhong, Q.-L. Lin, *J. Fluorine Chem.* **2007**, *128*, 636-640.
- [2] X. Lin, G. Wang, H. Li, Y. Huang, W. He, D. Ye, K.-W. Huang, Y. Yuan, Z. Weng, *Tetrahedron* **2013**, *69*, 2628-2632.
- [3] X. Chen, M. Tordeux, J.-R. Desmurs, C. Wakselman, *J. Fluorine Chem.* **2003**, *123*, 51-56.
- [4] K. Kamata, M. Kotani, K. Yamaguchi, S. Hikichi, N. Mizuno, *Chemistry – A European Journal* **2007**, *13*, 639-648.
